# Supplementary material
Source: bioRxiv or medRxiv preprint supplement (https://medrxiv.org/highwire/filestream/79372/field_highwire_adjunct_files/0/2020.05.01.20087106-1.pdf)
Supplement: Supplementary file [file 2020.05.01.20087106-1.pdf]

## **Supplementary Information**

**Supplementary Methods 1.** Processing and DNA extraction from tumor, peripheral blood mononuclear cells, and plasma samples

**Supplementary Methods 2.** Amplicon sequencing of primary tumor

**Supplementary Methods 3.** Identification of Somatic Mutation

**Supplementary Methods 4.** Amplicon sequencing of *TP53* gene in plasma DNA samples

**Supplementary Methods 5.** dPCR analysis

**Supplementary Table S1.** Clinicopathological characteristics of study patients

**Supplementary Table S2.** Target genes in the specifically designed SCC panel

**Supplementary Table S3.** Primary tumor mutations detected by sequencing analysis using the SCC panel

**Supplementary Table S4.** Treatment and outcomes of ESCC patients

**Supplementary Table S5.** Univariate analysis of overall survival for 34 ESCC patients

**Supplementary Table S6.** dPCR-evaluated mutations duplicatedly detected in multiple cases

**Supplementary Figure S1.** Flow chart of patient outcomes

**Supplementary Figure S2.** Blood sample collection processes

**Supplementary Figure S3.** ctDNA detection by digital PCR

**Supplementary Figure S4.** Variant allele frequencies of mutated genes in primary tumors

**Supplementary Figure S5.** Primary tumor-specific mutations and ctDNA in pretreatment plasma

**Supplementary Figure S6.** Correlation between VAFs measured by NGS and dPCR

**Supplementary Figure S7.** *NFE2L2* mutations in primary tumors and chemotherapeutic response

**Supplementary Figure S8.** Case presentations

**Supplementary References**

This supplementary material provides additional information about this study that was not included in the main text.

### **Supplementary Methods 1. Sample processing and DNA extraction from tumor, peripheral blood mononuclear cells, and plasma samples**

Endoscopically acquired pretreatment primary tumor tissue and corresponding serial blood samples were obtained from all enrolled patients. In principle, the timing of imaging examinations, blood collection for ctDNA and serum tumor markers including squamous cell carcinoma antigen (SCC), carcinoembryonic antigen (CEA), and cytokeratin 19 fragments (CYFRA 21-1) were all intended to be matched.

Tumor tissues were stored at  $-80\text{ }^{\circ}\text{C}$  until DNA extraction. Serial whole blood samples were collected into Cell-Free DNA Blood Collection Tubes (BCT<sup>®</sup>) (Streck, La Vista, NE) and stored at room temperature until plasma collection. To collect plasma samples, BCT tubes were centrifuged at  $1800 \times g$  for 20 min at room temperature using a swing-out rotor (KUBOTA, Tokyo, Japan). The plasma layer was transferred to a new 15 ml collection tube, and centrifuged at room temperature at  $1800 \times g$  for 20 min to remove any residual cellular debris. The supernatant was transferred again to a new cryotube and frozen at  $-80\text{ }^{\circ}\text{C}$  until DNA extraction ([supplementary Figure S2](#), top).

Peripheral blood mononuclear cells (PBMCs) were collected from the buffy coat layer after centrifugation of pretreatment whole blood samples in BCT tubes and were transferred into a BD Vacutainer<sup>®</sup> CPT<sup>™</sup> Cell Preparation Tube (CPT) ([supplementary](#)

Figure S2, middle). According to this procedure, PBMCs can be isolated beyond the two-hour time window after blood collection in CPT, which avoids cytolytic release of cellular DNA from nucleated cells into the plasma (supplementary Figure S2, middle and bottom). Wollison et al. demonstrated by whole exome sequence and copy number microarray analyses that fixative in the BCT did not impact PBMC DNA quality [1]. In their sample collection procedure, plasma was stored after centrifugation of collected blood in BCT followed by DNA extraction from PBMC isolated from the remaining blood using a Gentra Puregene Blood Kit (Qiagen, Hilden, Germany). According to the kit protocol, several hours are required after centrifugation and removal of plasma to complete PBMC DNA extraction. Our combinatory method using both BCT and CPT for long-term preservation enables extraction of high-quality DNA from both plasma and PBMC after storage of up to seven days at room temperature. In this study, all plasma and PBMC samples were isolated within seven days of blood collection. Plasma DNA was extracted from 4-5 ml frozen plasma samples using a QIAamp<sup>®</sup> Circulating Nucleic Acid Kit according to the manufacturer's instructions (Qiagen, Hilden, Germany). Extracted DNA was eluted in 70-100 µl Qiagen Buffer AVE and stored at -20 °C until analysis. Tumor and PBMC DNA were isolated using a QIAamp<sup>®</sup> DNA Mini Kit (Qiagen, Hilden, Germany) and stored at -20 °C until analysis.

## **Supplementary Methods 2. Amplicon sequencing of primary tumors**

For mutation screening of esophageal squamous cell cancer (ESCC) samples, a pair of tumor tissue samples and corresponding PBMCs was subjected to amplicon sequencing using the Ion PGM™ system according to the manufacturer's protocol (Thermo Fisher Scientific, Waltham, MA). Samples were sequenced using a specifically-designed SCC panel targeting 31 genes that have been reported to be frequently altered in ESCC and head and neck squamous cell carcinomas ([supplementary Table S2](#)) [2-8]. The SCC panel covers 617 exons of 31 genes and exon/intron boundaries with 1,194 amplicons. The entire length of the panel sequence is 220.57 kb, and the average amplicon size is 202 bp. Approximately 20 ng DNA per sample was used to prepare barcoded libraries with IonXpress barcoded adapters and an Ion AmpliSeq Library Kit 2.0 (Thermo Fisher Scientific). Ten individual barcoded libraries (100 pM each) were pooled and clonally amplified through emulsion PCR using a One Touch Instrument and the Ion PGM Template OT2 200 kit (Thermo Fisher Scientific). Finally, sequencing was performed on a PGM 316 chip using an Ion PGM 200 Sequencing Kit v2 according to the manufacturer's instructions (200 bp read length, Thermo Fisher Scientific). In this sequence analysis from primary ESCC tumor and PBMC DNA, the average base

coverage depth was 2,864 and the average percent reads on target was 91.8%.

### **Supplementary Methods 3. Identification of somatic mutations**

Genome Reference Consortium Human Build 37 (GRCh37/hg19) was used as a reference.

Alignment to the GRCh37/hg19 genome and sequencing read counting were performed

in Torrent Suite version 5.0 (Thermo Fisher Scientific). Somatic mutations, including

single-nucleotide variants, insertions, and deletions were detected using a variant call

algorithm in tumor- and matched-PBMC samples from the Ion Reporter software 5.0

tumor-normal workflow (Thermo Fisher Scientific), in which germline variants were

subtracted from the tumor variants as previously described [9]. All identified single-

nucleotide variants (SNVs), insertions, and deletions (INDELs) were visually inspected

using Integrative Genomics Viewer software to filter out possible strand-specific errors,

such as a mutation detected in only the forward or reverse DNA strand. The dbSNP

database was used to exclude single nucleotide polymorphisms (SNPs) from the called

variants. The following criteria were used as cutoffs: (i) total coverage >200, (ii) variant

coverage >6, and (iii) variant frequency >2%. Mutations were called if they occurred in

<0.1% of reads in the normal control (minor allele frequency) and were absent from

dbSNP as well as the 1000 Genomes Project database.

#### **Supplementary Methods 4. Amplicon sequencing of *TP53* gene in plasma DNA samples**

For mutation screening, plasma DNA samples from 28 patients with Stage IB or higher disease were subjected to amplicon sequencing using an Ion AmpliSeq™ *TP53* Panel according to the manufacturer's protocol (Thermo Fisher Scientific). This 1,280 bp panel has 24 amplicons that cover all coding exons of the *TP53* gene and produces an average amplicon size of 106 bp.

#### **Supplementary Methods 5. dPCR analysis**

PCR reactions were prepared with 7.5 µl QuantStudio3D Digital PCR master mix (Thermo Fisher Scientific), 1.5 µL primer/probe mix for each mutation (adjusted to a final concentration of 900 nM of forward and reverse primers and 250 nM for wild type and mutant probes) and plasma or tumor DNA (3-20 ng) in a total volume of 15 µl. PCR products were loaded onto a QuantStudio 3D Digital PCR Chip (Thermo Fisher Scientific) and amplified using the ProFlex 2x Flat PCR System (Thermo Fisher Scientific). The annealing and extension temperatures were set at 56 °C or 60 °C, and PCR was run for 39 cycles. After PCR amplification, chips were read on a QuantStudio

3D Digital PCR Instrument (Thermo Fisher Scientific), and a secondary analysis was performed with QuantStudio 3D Analysis Suit Cloud software (Thermo Fisher Scientific). For further quality control, the boundaries of FAM, VIC, and undetermined events can be manually defined.

After confirmation of sufficiently separate reactions of both wild type and mutant alleles in tumor DNA, plasma DNA was evaluated by dPCR ([supplementary Figure S3A](#)). Plasma samples having more than two positive reactions (i.e., dots) for mutant DNA were defined as ctDNA-positive samples. If only one positive reaction for mutant DNA was detected, samples meeting the following criteria were considered as ctDNA-positive: (i) more than one positive reaction for mutant DNA could be repeatedly detected upon retesting the same sample; (ii) more than one positive reaction for the same mutant DNA was detected in samples collected at similar time points; (iii) more than one positive reaction for another mutant DNA was detected in the same sample ([supplementary Figure S3B](#)). The VAF values were calculated as the fraction of mutant/(mutant + wild) divided by the number of partitions in which either the mutant or wild-type sequence was detected [10]. If no mutant partitions were detected, the case DNA was regarded as "negative".



### Supplementary References

1. Wollison BM, Thai E, McKinney A et al. Blood collection in cell-stabilizing tubes does not impact germline DNA quality for pediatric patients. *PLoS One* 2017; 12: e0188835.
2. Gao YB, Chen ZL, Li JG et al. Genetic landscape of esophageal squamous cell carcinoma. *Nat Genet* 2014; 46: 1097-1102.
3. Lin DC, Hao JJ, Nagata Y et al. Genomic and molecular characterization of esophageal squamous cell carcinoma. *Nat Genet* 2014; 46: 467-473.
4. Song Y, Li L, Ou Y et al. Identification of genomic alterations in oesophageal squamous cell cancer. *Nature* 2014; 509: 91-95.
5. Sawada G, Niida A, Uchi R et al. Genomic landscape of esophageal squamous cell carcinoma in a japanese population. *Gastroenterology* 2016; 150: 1171-1182.
6. Agrawal N, Frederick MJ, Pickering CR et al. Exome sequencing of head and neck squamous cell carcinoma reveals inactivating mutations in NOTCH1. *Science* 2011; 333: 1154-1157.
7. Stransky N, Egloff AM, Tward AD et al. The mutational landscape of head and neck squamous cell carcinoma. *Science* 2011; 333: 1157-1160.
8. Pickering CR, Zhang J, Yoo SY et al. Integrative genomic characterization of

oral squamous cell carcinoma identifies frequent somatic drivers. *Cancer Discov* 2013; 3: 770-781.

9. Nakagaki T, Tamura M, Kobashi K et al. Profiling cancer-related gene mutations in oral squamous cell carcinoma from Japanese patients by targeted amplicon sequencing. *Oncotarget* 2017; 8: 59113-59122.

10. Huggett JF, Foy CA, Benes V et al. The digital MIQE guidelines: Minimum information for publication of quantitative digital PCR experiments. *Clin Chem* 2013; 59: 892-902.

**Supplementary Table S1. Clinicopathological characteristics of study patients**

| Patient ID | Age | Gender | Locus <sup>a</sup> | UICC stage <sup>b</sup> | TNM <sup>b</sup> | pretreatment tumor volume (cm <sup>3</sup> ) |
|------------|-----|--------|--------------------|-------------------------|------------------|----------------------------------------------|
| EC_1       | 67  | Male   | Ut                 | IIIA                    | T1bN2M0          | 0.8                                          |
| EC_2       | 66  | Male   | LtAeG              | IIIC                    | T4bN1M0          | 521.8                                        |
| EC_3       | 69  | Male   | LtAe               | IV                      | T3N2M1           | 142.8                                        |
| EC_4       | 65  | Male   | CeUt               | IIIC                    | T4bN1M0          | 16.2                                         |
| EC_5       | 60  | Female | Ae                 | IA                      | T1bN0M0          | 1.1                                          |
| EC_6       | 56  | Male   | Ut                 | IIA                     | T3N0M0           | 6.6                                          |
| EC_7       | 62  | Female | MtUt               | IIIA                    | T3N1M0           | 15.6                                         |
| EC_8       | 67  | Male   | MtUtLt             | IIIC                    | T4bN2M0          | 78.9                                         |
| EC_9       | 81  | Male   | MtLtAe             | IIIB                    | T3N2M0           | 25.8                                         |
| EC_10      | 71  | Female | Mt                 | IIIC                    | T4bN1M0          | 32.9                                         |
| EC_11      | 71  | Female | MtUtLt             | IV                      | T3N3M1           | 247.4                                        |
| EC_12      | 76  | Male   | Mt                 | IA                      | T1bN0M0          | 0.1                                          |
| EC_13      | 81  | Male   | Lt                 | IV                      | T3N1M1           | 21.9                                         |
| EC_14      | 65  | Male   | UtMt               | IIIC                    | T4bN2M0          | 59.5                                         |
| EC_15      | 78  | Male   | MtLt               | IV                      | T4bN2M1          | 79.7                                         |
| EC_16      | 55  | Female | Lt                 | IIIB                    | T3N2M0           | 17.3                                         |
| EC_17      | 75  | Female | Ae                 | IIIA                    | T3N1M0           | 12.6                                         |
| EC_18      | 78  | Male   | Lt                 | IV                      | T1bN2M1          | 14.2                                         |
| EC_19      | 70  | Male   | LtAe               | IIIC                    | T4bN1M0          | 64.1                                         |
| EC_20      | 57  | Male   | Ae                 | IIIA                    | T3N1M0           | 68.7                                         |
| EC_21      | 48  | Male   | Lt                 | IIA                     | T3N0M0           | 22.6                                         |
| EC_22      | 75  | Male   | Mt                 | IIB                     | T2N1M0           | 3.8                                          |
| EC_23      | 77  | Male   | Mt                 | IA                      | T1bN0M0          | 0.5                                          |
| EC_24      | 53  | Male   | UtMt               | IIIC                    | T4bN0M0          | 35.3                                         |
| EC_25      | 74  | Male   | Lt                 | IIIA                    | T3N1M0           | 9.4                                          |
| EC_26      | 63  | Male   | Mt                 | IIIC                    | T4bN1M0          | 37.5                                         |
| EC_27      | 68  | Male   | Mt                 | IA                      | T1aN0M0          | 1.3                                          |
| EC_28      | 78  | Male   | Mt                 | IA                      | T1bN0M0          | 0.2                                          |
| EC_29      | 65  | Male   | Mt                 | IIIC                    | T4bN2M0          | 30.9                                         |
| EC_30      | 65  | Male   | LtMt               | IIIB                    | T3N2M0           | 81.6                                         |
| EC_31      | 77  | Male   | Ut                 | IA                      | T1aN0M0          | 0.2                                          |
| EC_32      | 66  | Female | LtMt               | IIIC                    | T4aN1M0          | 44.9                                         |
| EC_33      | 80  | Male   | Ut                 | IIIC                    | T4bN1M0          | 24.9                                         |
| EC_34      | 73  | Male   | Lt                 | IA                      | T1bN0M0          | 1.8                                          |
| EC_35      | 64  | Male   | Mt                 | IIIC                    | T4bN3M0          | 56.6                                         |
| EC_36      | 64  | Male   | Ut                 | IB                      | T2N0M0           | 4.5                                          |

<sup>a</sup> Anatomical regions of the esophagus: Ce, Cervical esophagus; Ut, Upper thoracic esophagus; Mt, Middle thoracic esophagus; Lt, Lower thoracic esophagus; Ae, Abdominal esophagus (Japanese Classification of Esophageal Cancer, 11th edition)

<sup>b</sup> TNM classification, 7th edition

**Supplementary Table S2. Target genes in the specifically designed SCC panel**

|               |               |               |               |               |
|---------------|---------------|---------------|---------------|---------------|
| <i>AJUBA</i>  | <i>CASP8</i>  | <i>CCND1</i>  | <i>CDKN2A</i> | <i>CREBBP</i> |
| <i>EGFR</i>   | <i>EP300</i>  | <i>FAT1</i>   | <i>FAT2</i>   | <i>FBXW7</i>  |
| <i>FGFR1</i>  | <i>HRAS</i>   | <i>KDM6A</i>  | <i>KEAP1</i>  | <i>KMT2C</i>  |
| <i>KMT2D</i>  | <i>NFE2L2</i> | <i>NOTCH1</i> | <i>NOTCH2</i> | <i>NOTCH3</i> |
| <i>NSD1</i>   | <i>PIK3CA</i> | <i>PTEN</i>   | <i>RB1</i>    | <i>SOX2</i>   |
| <i>TET2</i>   | <i>TGFBR2</i> | <i>TP53</i>   | <i>TP63</i>   | <i>YAP1</i>   |
| <i>ZNF750</i> |               |               |               |               |

Supplementary Table S3. Primary tumor mutations detected by sequencing analysis using the SCC panel

| Case ID        | Chromosomal location | gene          | Variant type        | Base change             | Amino acid change | Total allele | Normal allele | Variant allele | VAF <sup>a</sup> (%) | dPCR <sup>b</sup> |
|----------------|----------------------|---------------|---------------------|-------------------------|-------------------|--------------|---------------|----------------|----------------------|-------------------|
| EC_1           | chr4:153249422       | <i>FBXW7</i>  | missense            | c.1356A>T               | p.Glu452Asp       | 1743         | 1430          | 313            | 18.0                 |                   |
|                | chr16:3781366        | <i>CREBBP</i> | missense            | c.4999T>C               | p.Phe1667Leu      | 909          | 880           | 29             | 3.2                  |                   |
|                | chr17:7578394        | <i>TP53</i>   | missense            | c.536A>G                | p.His179Arg       | 1989         | 1500          | 489            | 24.6                 | Yes               |
|                | chr17:80789877       | <i>ZNF750</i> | frameshiftDeletion  | c.453_453delT           | p.Ala152fs        | 1994         | 1394          | 600            | 30.1                 | Yes               |
|                | chr19:15299961       | <i>NOTCH3</i> | missense            | c.1217G>A               | p.Gly406Asp       | 1495         | 1319          | 176            | 11.8                 |                   |
|                | chr17:7576845        | <i>TP53</i>   | intron              | c.993+8G>T              |                   | 1997         | 1678          | 319            | 16.0                 |                   |
|                | chr2:178095689       | <i>NFE2L2</i> | missense            | c.1642A>G               | p.Lys548Glu       | 911          | 881           | 30             | 3.3                  |                   |
|                | chr2:178095693       | <i>NFE2L2</i> | missense            | c.1638T>G               | p.Asn546Lys       | 902          | 862           | 40             | 4.4                  |                   |
|                | chr7:55238875        | <i>EGFR</i>   | missense            | c.1888G>A               | p.Gly630Arg       | 1377         | 1339          | 38             | 2.8                  |                   |
|                | chr7:151945007       | <i>KMT2C</i>  | missense            | c.2512G>A               | p.Gly838Ser       | 1233         | 1151          | 82             | 6.7                  |                   |
|                | chr7:151962265       | <i>KMT2C</i>  | missense            | c.1042G>A               | p.Asp348Asn       | 1278         | 1228          | 50             | 3.9                  |                   |
|                | chr12:49426896       | <i>KMT2D</i>  | missense            | c.11592C>G              | p.His3864Gln      | 2000         | 1889          | 111            | 5.6                  |                   |
|                | chr12:49445055       | <i>KMT2D</i>  | missense            | c.2411T>C               | p.Leu804Ser       | 983          | 919           | 64             | 6.5                  |                   |
| chr16:3779323  | <i>CREBBP</i>        | missense      | c.5725C>A           | p.Pro1909Thr            | 1999              | 1929         | 70            | 3.5            |                      |                   |
| EC_2           | chr4:187549359       | <i>FAT1</i>   | missense            | c.4759C>G               | p.Leu1587Val      | 2000         | 1232          | 768            | 38.4                 |                   |
|                | chr8:38279361        | <i>FGFR1</i>  | missense            | c.1128C>G               | p.Asn376Lys       | 1995         | 1082          | 913            | 45.8                 | Yes               |
|                | chr17:7578235        | <i>TP53</i>   | missense            | c.614A>G                | p.Tyr205Cys       | 1999         | 1242          | 757            | 37.9                 | Yes               |
|                | chr17:7578271        | <i>TP53</i>   | missense            | c.578A>G                | p.His193Arg       | 2000         | 1713          | 287            | 14.4                 | Yes               |
|                | chr3:178927381       | <i>PIK3CA</i> | spliceite           | c.1146-2A>G             |                   | 1999         | 1,643         | 356            | 17.8                 |                   |
|                | chr7:151945007       | <i>KMT2C</i>  | missense            | c.2512G>A               | p.Gly838Ser       | 1999         | 1913          | 86             | 4.3                  |                   |
| EC_3           | chr2:178098799       | <i>NFE2L2</i> | missense            | c.246A>T                | p.Glu82Asp        | 1131         | 665           | 466            | 41.2                 | Yes               |
|                | chr4:187629603       | <i>FAT1</i>   | missense            | c.1379C>A               | p.Pro460His       | 1984         | 1911          | 73             | 3.7                  |                   |
|                | chr7:151859911       | <i>KMT2C</i>  | missense            | c.10751G>T              | p.Gly3584Val      | 1876         | 1775          | 101            | 5.4                  |                   |
|                | chr7:151921670       | <i>KMT2C</i>  | missense            | c.3008G>A               | p.Arg1003Lys      | 1237         | 1162          | 75             | 6.1                  |                   |
|                | chr17:7578431        | <i>TP53</i>   | nonsense            | c.499C>T                | p.Gln167Ter       | 277          | 118           | 159            | 57.4                 | Yes               |
|                | chr4:106155506       | <i>TET2</i>   | missense            | c.407G>A                | p.Ser136Asn       | 745          | 710           | 35             | 4.7                  |                   |
|                | chr7:55219001        | <i>EGFR</i>   | missense            | c.574C>T                | p.Pro192Ser       | 1994         | 1842          | 152            | 7.6                  |                   |
|                | chr7:151970856       | <i>KMT2C</i>  | missense            | c.946A>T                | p.Thr316Ser       | 1591         | 1459          | 132            | 8.3                  |                   |
|                | chr12:49426896       | <i>KMT2D</i>  | missense            | c.11592C>G              | p.His3864Gln      | 1999         | 1925          | 74             | 3.7                  |                   |
|                | chr12:49445055       | <i>KMT2D</i>  | missense            | c.2411T>C               | p.Leu804Ser       | 1126         | 1049          | 77             | 6.8                  |                   |
| chr16:3779323  | <i>CREBBP</i>        | missense      | c.5725C>A           | p.Pro1909Thr            | 1996              | 1878         | 118           | 5.9            |                      |                   |
| EC_4           | chr2:178098799       | <i>NFE2L2</i> | missense            | c.246A>T                | p.Glu82Asp        | 1322         | 875           | 447            | 33.8                 | Yes               |
|                | chr13:48916851       | <i>RB1</i>    | spliceite           | c.381+1G>T              |                   | 1546         | 857           | 689            | 44.6                 |                   |
|                | chr5:150924318       | <i>FAT2</i>   | missense            | c.6370G>A               | p.Asp2124Asn      | 2000         | 1925          | 75             | 3.8                  |                   |
|                | chr5:176636829       | <i>NSD1</i>   | missense            | c.1429A>G               | p.Lys477Glu       | 1999         | 1939          | 60             | 3.0                  |                   |
|                | chr7:151860616       | <i>KMT2C</i>  | missense            | c.10046C>T              | p.Pro3349Leu      | 1186         | 1130          | 56             | 4.7                  |                   |
|                | chr12:49426644       | <i>KMT2D</i>  | missense            | c.11843_11844delTTinsAA | p.Leu3948Gln      | 623          | 598           | 25             | 4.0                  |                   |
|                | chr17:7578190        | <i>TP53</i>   | missense            | c.659A>G                | p.Tyr220Cys       | 1996         | 633           | 1363           | 68.3                 | Yes               |
|                | chr1:120465015       | <i>NOTCH2</i> | missense            | c.5057T>C               | p.Val1686Ala      | 2000         | 1930          | 70             | 3.5                  |                   |
|                | chr7:151945007       | <i>KMT2C</i>  | missense            | c.2512G>A               | p.Gly838Ser       | 779          | 719           | 60             | 7.7                  |                   |
|                | chr12:49445055       | <i>KMT2D</i>  | missense            | c.2411T>C               | p.Leu804Ser       | 660          | 619           | 41             | 6.2                  |                   |
| EC_5           | chr9:139418261       | <i>NOTCH1</i> | missense            | c.311A>C                | p.Asn104Thr       | 2000         | 1923          | 77             | 3.9                  |                   |
|                | chr16:3778807        | <i>CREBBP</i> | nonsense            | c.6241C>T               | p.Gln2081Ter      | 1295         | 1172          | 123            | 9.5                  |                   |
|                | chr16:3786715        | <i>CREBBP</i> | missense            | c.4496T>C               | p.Leu1499Pro      | 2000         | 1801          | 199            | 10.0                 |                   |
|                | chr16:3807844        | <i>CREBBP</i> | missense            | c.3575T>G               | p.Val1192Gly      | 1992         | 1906          | 86             | 4.3                  |                   |
|                | chr16:3828817        | <i>CREBBP</i> | missense            | c.1825G>A               | p.Val609Ile       | 1812         | 1652          | 160            | 8.8                  |                   |
|                | chr17:7578212        | <i>TP53</i>   | nonsense            | c.637C>T                | p.Arg213Ter       | 1993         | 1704          | 289            | 14.5                 | Yes               |
| chr19:15298716 | <i>NOTCH3</i>        | missense      | c.1582G>T           | p.Gly528Cys             | 1997              | 1797         | 200           | 10.0           |                      |                   |
| EC_6           | chr7:151927023       | <i>KMT2C</i>  | nonsense            | c.2961C>G               | p.Tyr987Ter       | 220          | 205           | 15             | 6.8                  |                   |
|                | chr7:151945256       | <i>KMT2C</i>  | nonsense            | c.2263C>T               | p.Gln755Ter       | 1999         | 1924          | 75             | 3.8                  |                   |
|                | chr12:49445055       | <i>KMT2D</i>  | missense            | c.2411T>C               | p.Leu804Ser       | 397          | 371           | 26             | 6.5                  |                   |
|                | chr14:23451144       | <i>AJUBA</i>  | frameshiftInsertion | c.331_332insGC          | p.Leu111fs        | 1995         | 1316          | 679            | 34.0                 | Yes               |
|                | chr16:3779323        | <i>CREBBP</i> | missense            | c.5725C>A               | p.Pro1909Thr      | 1999         | 1942          | 57             | 2.9                  |                   |
| EC_7           | chr17:7578190        | <i>TP53</i>   | missense            | c.659A>G                | p.Tyr220Cys       | 1997         | 1115          | 882            | 44.2                 | Yes               |
|                | chr19:10602620       | <i>KEAP1</i>  | missense            | c.958C>T                | p.Arg320Trp       | 1999         | 1892          | 107            | 5.4                  |                   |
|                | chr7:151945007       | <i>KMT2C</i>  | missense            | c.2512G>A               | p.Gly838Ser       | 1854         | 1699          | 155            | 8.4                  |                   |
|                | chr17:7577500        | <i>TP53</i>   | frameshiftDeletion  | c.780_780delC           | p.Ser260fs        | 1990         | 1407          | 583            | 29.3                 | Yes               |
| chr19:15292506 | <i>NOTCH3</i>        | nonsense      | c.2673C>A           | p.Cys891Ter             | 845               | 625          | 220           | 26.0           | Yes                  |                   |
| EC_8           | chr4:187629772       | <i>FAT1</i>   | missense            | c.1210A>G               | p.Ser404Gly       | 1994         | 1920          | 74             | 3.7                  |                   |
|                | chr7:151945256       | <i>KMT2C</i>  | nonsense            | c.2263C>T               | p.Gln755Ter       | 1997         | 1903          | 94             | 4.7                  |                   |
|                | chr16:3842089        | <i>CREBBP</i> | missense            | c.1223A>G               | p.His408Arg       | 1137         | 974           | 163            | 14.3                 |                   |
|                | chr17:7578235        | <i>TP53</i>   | missense            | c.614A>G                | p.Tyr205Cys       | 1999         | 1473          | 526            | 26.3                 | Yes               |
|                | chr22:41565575       | <i>EP300</i>  | missense            | c.4241A>G               | p.Tyr1414Cys      | 1232         | 928           | 304            | 24.7                 |                   |
| EC_9           | chr3:181431028       | <i>SOX2</i>   | missense            | c.880A>G                | p.Met294Val       | 369          | 355           | 14             | 3.8                  |                   |
|                | chr3:189604293       | <i>TP63</i>   | missense            | c.1460G>A               | p.Arg487His       | 1983         | 1726          | 257            | 13.0                 |                   |
|                | chr4:187629772       | <i>FAT1</i>   | missense            | c.1210A>G               | p.Ser404Gly       | 1997         | 1925          | 72             | 3.6                  |                   |
|                | chr9:139412278       | <i>NOTCH1</i> | missense            | c.1367G>A               | p.Cys456Tyr       | 1999         | 1917          | 82             | 4.1                  |                   |
|                | chr12:49445055       | <i>KMT2D</i>  | missense            | c.2411T>C               | p.Leu804Ser       | 463          | 425           | 38             | 8.2                  |                   |
|                | chr14:23451000       | <i>AJUBA</i>  | frameshiftInsertion | c.475_476insA           | p.Ser159fs        | 1989         | 1424          | 565            | 28.4                 | Yes               |
| EC_10          | chr16:3779323        | <i>CREBBP</i> | missense            | c.5725C>A               | p.Pro1909Thr      | 1999         | 1936          | 63             | 3.2                  |                   |
|                | chr17:7578455        | <i>TP53</i>   | missense            | c.475G>C                | p.Ala159Pro       | 202          | 159           | 43             | 21.3                 | Yes               |
|                | chr1:120471716       | <i>NOTCH2</i> | nonsense            | c.3775G>T               | p.Glu1259Ter      | 1991         | 1804          | 187            | 9.4                  |                   |
|                | chr5:150907682       | <i>FAT2</i>   | missense            | c.10039G>A              | p.Asp3347Asn      | 1991         | 1610          | 381            | 19.1                 | Yes               |
|                | chr9:139413049       | <i>NOTCH1</i> | missense            | c.1093C>T               | p.Arg365Cys       | 2000         | 1959          | 41             | 2.1                  |                   |
|                | chr14:23450825       | <i>AJUBA</i>  | frameshiftInsertion | c.650_651insCA          | p.Gln217fs        | 1991         | 1204          | 787            | 39.5                 | Yes               |
|                | chr16:3779323        | <i>CREBBP</i> | missense            | c.5725C>A               | p.Pro1909Thr      | 1921         | 1858          | 63             | 3.3                  |                   |

|       |                |               |                     |                                     |              |      |      |      |      |                  |
|-------|----------------|---------------|---------------------|-------------------------------------|--------------|------|------|------|------|------------------|
|       | chr16:3807844  | <i>CREBBP</i> | missense            | c.3575T>G                           | p.Val1192Gly | 1994 | 1922 | 72   | 3.6  |                  |
|       | chr17:7578370  | <i>TP53</i>   | spliceite           | c.559+1C>T                          |              | 1999 | 1378 | 621  | 31.1 | Yes              |
| EC_11 | chr17:7577556  | <i>TP53</i>   | missense            | c.725G>T                            | p.Cys242Phe  | 1988 | 1343 | 645  | 32.4 | Yes              |
|       | chr7:151945007 | <i>KMT2C</i>  | missense            | c.2512G>A                           | p.Gly838Ser  | 2000 | 1876 | 124  | 6.2  |                  |
|       | chr7:151970856 | <i>KMT2C</i>  | missense            | c.946A>T                            | p.Thr316Ser  | 1998 | 1837 | 161  | 8.1  |                  |
|       | chr12:49445055 | <i>KMT2D</i>  | missense            | c.2411T>C                           | p.Leu804Ser  | 848  | 790  | 58   | 6.8  |                  |
|       | chr2:178098965 | <i>NFE2L2</i> | missense            | c.80A>G                             | p.Asp27Gly   | 1994 | 1381 | 613  | 30.7 |                  |
| EC_12 | chr17:7577530  | <i>TP53</i>   | frameshiftDeletion  | c.750_750delC                       | p.Ile251fs   | 1995 | 1951 | 44   | 2.2  |                  |
|       | chr17:7577574  | <i>TP53</i>   | missense            | c.707A>G                            | p.Tyr236Cys  | 1999 | 809  | 1190 | 59.5 | Yes              |
|       | chr3:181431028 | <i>SOX2</i>   | missense            | c.880A>G                            | p.Met294Val  | 209  | 200  | 9    | 4.3  |                  |
|       | chr12:49445055 | <i>KMT2D</i>  | missense            | c.2411T>C                           | p.Leu804Ser  | 390  | 356  | 34   | 8.7  |                  |
|       | chr16:3779323  | <i>CREBBP</i> | missense            | c.5725C>A                           | p.Pro1909Thr | 890  | 852  | 38   | 4.3  |                  |
| EC_13 | chr3:181431028 | <i>SOX2</i>   | missense            | c.880A>G                            | p.Met294Val  | 260  | 252  | 8    | 3.1  |                  |
|       | chr17:7579358  | <i>TP53</i>   | missense            | c.329G>T                            | p.Arg110Leu  | 1766 | 1447 | 319  | 18.1 | Yes              |
|       | chr17:80788479 | <i>ZNF750</i> | lnonsense           | c.1711C>T                           | p.Arg571Ter  | 1673 | 1357 | 316  | 18.9 |                  |
|       | chr7:151945007 | <i>KMT2C</i>  | missense            | c.2512G>A                           | p.Gly838Ser  | 1614 | 1505 | 109  | 6.8  |                  |
|       | chr12:49445055 | <i>KMT2D</i>  | missense            | c.2411T>C                           | p.Leu804Ser  | 224  | 212  | 12   | 5.4  |                  |
|       | chr16:3807844  | <i>CREBBP</i> | missense            | c.3575T>G                           | p.Val1192Gly | 1993 | 1939 | 54   | 2.7  |                  |
| EC_14 | chr2:178095691 | <i>NFE2L2</i> | missense            | c.1640A>G                           | p.Asp547Gly  | 1999 | 1341 | 658  | 32.9 |                  |
|       | chr2:178098809 | <i>NFE2L2</i> | missense            | c.236A>C                            | p.Glu79Ala   | 1995 | 1352 | 643  | 32.2 |                  |
|       | chr14:23447575 | <i>AJUBA</i>  | frameshiftInsertion | c.1085_1086insTGGACAGCTCTACCACACCCA | p.Gln362fs   | 1975 | 795  | 1180 | 59.7 |                  |
|       | chr16:3777761  | <i>CREBBP</i> | missense            | c.7285_7287delGACinsACG             | p.Asp2429Thr | 1995 | 1931 | 64   | 3.2  |                  |
|       | chr17:7578550  | <i>TP53</i>   | missense            | c.380C>T                            | p.Ser127Phe  | 209  | 68   | 141  | 67.5 | Yes              |
|       | chr12:49434075 | <i>KMT2D</i>  | missense            | c.7478G>T                           | p.Gly2493Val | 1049 | 1013 | 36   | 3.4  |                  |
| EC_15 | chr17:7577120  | <i>TP53</i>   | missense            | c.818G>A                            | p.Arg273His  | 1170 | 461  | 708  | 60.5 | Yes              |
|       | chr14:23450675 | <i>AJUBA</i>  | frameshiftInsertion | c.800_801insTA                      | p.Gly268fs   | 1766 | 697  | 974  | 55.2 | Yes              |
|       | chr9:21971035  | <i>CDKN2A</i> | frameshiftDeletion  | c.310_322delCTGGACGTGCGCG           | p.Leu104fs   | 1857 | 1040 | 817  | 44.0 | Yes              |
|       | chr2:178098815 | <i>NFE2L2</i> | missense            | c.230A>T                            | p.Asp77Val   | 1277 | 1239 | 38   | 3.0  |                  |
|       | chr4:106157845 | <i>TET2</i>   | nonsense            | c.2746C>T                           | p.Gln916Ter  | 1241 | 1116 | 125  | 10.1 |                  |
|       | chr9:139401755 | <i>NOTCH1</i> | frameshiftDeletion  | c.3633_3644+1delCCCTGAGTGCCC        | p.Arg1211fs  | 1791 | 823  | 42   | 2.3  |                  |
| EC_16 | chr17:7578271  | <i>TP53</i>   | missense            | c.578A>T                            | p.His193Leu  | 1998 | 551  | 1447 | 72.4 | Yes              |
|       | chr2:178098806 | <i>NFE2L2</i> | missense            | c.239C>A                            | p.Thr80Lys   | 1735 | 789  | 946  | 54.5 | Yes              |
|       | chr4:153247289 | <i>FBXW7</i>  | missense            | c.1513C>G                           | p.Arg505Gly  | 1255 | 1229 | 26   | 2.1  |                  |
|       | chr7:151945256 | <i>KMT2C</i>  | nonsense            | c.2263C>T                           | p.Gln755Ter  | 1998 | 1814 | 184  | 9.2  |                  |
|       | chr10:89692985 | <i>PTEN</i>   | missense            | c.469G>A                            | p.Glu157Lys  | 547  | 511  | 36   | 6.6  |                  |
|       | chr12:49445055 | <i>KMT2D</i>  | missense            | c.2411T>C                           | p.Leu804Ser  | 269  | 253  | 16   | 5.9  |                  |
|       | chr16:3807844  | <i>CREBBP</i> | missense            | c.3575T>G                           | p.Val1192Gly | 1969 | 1875 | 94   | 4.8  |                  |
| EC_17 | chr17:7577551  | <i>TP53</i>   | missense            | c.730G>A                            | p.Gly244Ser  | 2000 | 1815 | 185  | 9.3  | Yes <sup>d</sup> |
|       | chr7:151945007 | <i>KMT2C</i>  | missense            | c.2512G>A                           | p.Gly838Ser  | 1999 | 1828 | 171  | 8.6  |                  |
|       | chr12:49445055 | <i>KMT2D</i>  | missense            | c.2411T>C                           | p.Leu804Ser  | 984  | 935  | 49   | 5.0  |                  |
|       | chr12:49426669 | <i>KMT2D</i>  | missense            | c.11819T>A                          | p.Leu3940His | 372  | 357  | 15   | 4.0  |                  |
|       | chr16:3807844  | <i>CREBBP</i> | missense            | c.3575T>G                           | p.Val1192Gly | 1989 | 1924 | 65   | 3.3  |                  |
| EC_18 | chr17:7578235  | <i>TP53</i>   | missense            | c.614A>G                            | p.Tyr205Cys  | 2000 | 1719 | 281  | 14.1 | Yes              |
|       | chr9:139413094 | <i>NOTCH1</i> | missense            | c.1048T>C                           | p.Cys350Arg  | 1996 | 1886 | 110  | 5.5  |                  |
|       | chr9:139391555 | <i>NOTCH1</i> | missense            | c.6636C>A                           | p.Asp2212Glu | 1999 | 1408 | 591  | 29.6 | Yes              |
|       | chr7:151945228 | <i>KMT2C</i>  | missense            | c.2291C>T                           | p.Ser764Phe  | 2000 | 1812 | 188  | 9.4  |                  |
| EC_19 | chr1:120539833 | <i>NOTCH2</i> | missense            | c.538G>A                            | p.Glu180Lys  | 1999 | 1870 | 362  | 18.1 |                  |
|       | chr2:178098799 | <i>NFE2L2</i> | missense            | c.246A>T                            | p.Glu82Asp   | 1990 | 1521 | 469  | 23.6 | Yes              |
|       | chr7:151900060 | <i>KMT2C</i>  | missense            | c.4051A>G                           | p.Arg1351Gly | 1974 | 376  | 129  | 6.5  |                  |
|       | chr9:139412303 | <i>NOTCH1</i> | nonsense            | c.1342C>T                           | p.Arg448Ter  | 1989 | 1400 | 589  | 29.6 | Yes              |
| EC_20 | chr17:7578526  | <i>TP53</i>   | frameshiftInsertion | c.399_400insCAAGATG                 | p.Phe134fs   | 207  | 127  | 80   | 38.6 | Yes              |
|       | chr12:49445046 | <i>KMT2D</i>  | missense            | c.2420C>G                           | p.Ser807Cys  | 391  | 173  | 74   | 18.9 |                  |
|       | chr12:49445055 | <i>KMT2D</i>  | missense            | c.2411T>C                           | p.Leu804Ser  | 1136 | 1073 | 63   | 5.5  |                  |
| EC_21 | chr17:7578190  | <i>TP53</i>   | missense            | c.659A>G                            | p.Tyr220Cys  | 1471 | 1025 | 446  | 30.3 | Yes              |
|       | chr9:21974786  | <i>CDKN2A</i> | frameshiftDeletion  | c.40delG                            | p.Asp14fs    | 132  | 109  | 23   | 17.4 | Yes <sup>c</sup> |
|       | chr9:139412297 | <i>NOTCH1</i> | missense            | c.1348G>A                           | p.Glu450Lys  | 2000 | 1859 | 141  | 7.1  |                  |
|       | chr17:7577099  | <i>TP53</i>   | missense            | c.839G>C                            | p.Arg280Thr  | 1999 | 1829 | 170  | 8.5  | Yes <sup>d</sup> |
|       | chr4:187538943 | <i>FAT1</i>   | nonsense            | c.8797C>T                           | p.Gln2933Ter | 1999 | 1927 | 72   | 3.6  |                  |
|       | chr4:187560876 | <i>FAT1</i>   | missense            | c.3641_3642delA/GinsTA              | p.Glu1214Val | 1999 | 1936 | 63   | 3.2  |                  |
|       | chr7:151945256 | <i>KMT2C</i>  | nonsense            | c.2263C>T                           | p.Gln755Ter  | 1999 | 1875 | 124  | 6.2  |                  |
|       | chr12:49445055 | <i>KMT2D</i>  | missense            | c.2411T>C                           | p.Leu804Ser  | 936  | 894  | 42   | 4.5  |                  |
| EC_22 | chr17:7579473  | <i>TP53</i>   | missense            | c.214C>G                            | p.Pro72Ala   | 1999 | 1930 | 69   | 3.5  |                  |
|       | chr17:7578403  | <i>TP53</i>   | missense            | c.527G>A                            | p.Cys176Tyr  | 1997 | 1418 | 579  | 29.0 | Yes              |
|       | chr7:151927023 | <i>KMT2C</i>  | nonsense            | c.2961C>G                           | p.Tyr987Ter  | 207  | 189  | 18   | 8.7  |                  |
|       | chr7:151927067 | <i>KMT2C</i>  | missense            | c.2917A>G                           | p.Arg973Gly  | 223  | 204  | 19   | 8.5  |                  |
|       | chr7:151945256 | <i>KMT2C</i>  | nonsense            | c.2263C>T                           | p.Gln755Ter  | 2000 | 1845 | 155  | 7.8  |                  |
|       | chr12:49426669 | <i>KMT2D</i>  | missense            | c.11819T>A                          | p.Leu3940His | 355  | 336  | 19   | 5.4  |                  |
|       | chr12:49445055 | <i>KMT2D</i>  | missense            | c.2411T>C                           | p.Leu804Ser  | 622  | 580  | 42   | 6.8  |                  |
| EC_23 | chr17:7579473  | <i>TP53</i>   | missense            | c.214C>G                            | p.Pro72Ala   | 2000 | 1876 | 124  | 6.2  |                  |
|       | chr2:202131352 | <i>CASP8</i>  | missense            | c.320T>G                            | p.Leu107Arg  | 1988 | 1374 | 614  | 30.9 |                  |
|       | chr2:178098960 | <i>NFE2L2</i> | missense            | c.85G>A                             | p.Asp29Asn   | 1981 | 1327 | 654  | 33.0 |                  |
|       | chr17:7577129  | <i>TP53</i>   | missense            | c.809T>G                            | p.Phe270Cys  | 1998 | 1329 | 669  | 33.5 | Yes              |
|       | chr17:7577534  | <i>TP53</i>   | missense            | c.747G>T                            | p.Arg249Ser  | 1999 | 1377 | 622  | 31.1 |                  |
| EC_24 | chr7:151945007 | <i>KMT2C</i>  | missense            | c.2512G>A                           | p.Gly838Ser  | 1457 | 1364 | 93   | 6.4  |                  |
|       | chr17:7579389  | <i>TP53</i>   | nonsense            | c.298C>T                            | p.Gln100Ter  | 1119 | 507  | 612  | 54.7 | Yes              |
|       | chr1:120464356 | <i>NOTCH2</i> | missense            | c.5290C>A                           | p.Pro1764Thr | 441  | 406  | 35   | 7.9  |                  |
|       | chr7:55219001  | <i>EGFR</i>   | missense            | c.574C>T                            | p.Pro192Ser  | 762  | 709  | 53   | 7.0  |                  |
|       | chr5:150905399 | <i>FAT2</i>   | missense            | c.10436C>A                          | p.Pro3479Gln | 521  | 486  | 35   | 6.7  |                  |
|       | chr12:49445055 | <i>KMT2D</i>  | missense            | c.2411T>C                           | p.Leu804Ser  | 226  | 211  | 15   | 6.6  |                  |
|       | chr4:187628886 | <i>FAT1</i>   | missense            | c.2096T>A                           | p.Val699Glu  | 550  | 529  | 21   | 3.8  |                  |
|       | chr9:139396800 | <i>NOTCH1</i> | missense            | c.5308C>T                           | p.Pro1770Ser | 224  | 216  | 8    | 3.6  |                  |

|       |                |        |                     |                                       |                             |      |      |      |      |                  |
|-------|----------------|--------|---------------------|---------------------------------------|-----------------------------|------|------|------|------|------------------|
|       | chr2:202139654 | CASP8  | missense            | c.815G>A                              | p.Arg272Lys                 | 227  | 219  | 8    | 3.5  |                  |
|       | chr2:202137660 | CASP8  | nonsense            | c.767C>A                              | p.Ser256Ter                 | 475  | 459  | 16   | 3.4  |                  |
|       | chr22:41548280 | EP300  | missense            | c.3068T>A                             | p.Ile1023Lys                | 390  | 378  | 12   | 3.1  |                  |
|       | chr4:106158099 | TET2   | missense            | c.3000C>A                             | p.Asn1000Lys                | 1416 | 1382 | 34   | 2.4  |                  |
|       | chr4:106156736 | TET2   | missense            | c.1637A>C                             | p.Lys546Thr                 | 294  | 287  | 7    | 2.4  |                  |
|       | chr4:153244137 | FBXW7  | missense            | c.2020C>T                             | p.Arg674Trp                 | 317  | 305  | 12   | 3.8  |                  |
|       | chr4:187509910 | FAT1   | missense            | c.13603A>T                            | p.Met4535Leu                | 1630 | 1578 | 52   | 3.2  |                  |
|       | chr5:150922608 | FAT2   | missense            | c.8080C>G                             | p.Pro2694Ala                | 214  | 207  | 7    | 3.3  |                  |
|       | chr5:176636829 | NSD1   | missense            | c.1429A>G                             | p.Lys477Glu                 | 1277 | 1248 | 29   | 2.3  |                  |
| EC_25 | chr7:151836843 | KMT2C  | missense            | c.14377A>C                            | p.Lys4793Gln                | 386  | 367  | 19   | 4.9  |                  |
|       | chr7:151860431 | KMT2C  | missense            | c.10231C>G                            | p.Gln3411Glu                | 233  | 223  | 10   | 4.3  |                  |
|       | chr7:151962265 | KMT2C  | missense            | c.1042G>A                             | p.Asp348Asn                 | 690  | 672  | 18   | 2.6  |                  |
|       | chr9:139412281 | NOTCH1 | missense            | c.1364A>G                             | p.Glu455Val                 | 949  | 911  | 38   | 4.0  |                  |
|       | chr9:139412609 | NOTCH1 | missense            | c.1235A>T                             | p.Asp412Val                 | 1350 | 1309 | 41   | 3.0  |                  |
|       | chr12:49445055 | KMT2D  | missense            | c.2411T>C                             | p.Leu804Ser                 | 223  | 214  | 9    | 4.0  |                  |
|       | chr17:7577545  | TP53   | missense            | c.736A>T                              | p.Met246Leu                 | 1999 | 1935 | 64   | 3.2  | Yes <sup>d</sup> |
|       | chr1:120464356 | NOTCH2 | missense            | c.5290C>A                             | p.Pro1764Thr                | 322  | 297  | 25   | 7.8  |                  |
|       | chr3:189349366 | TP63   | missense            | c.62G>C                               | p.Arg21Pro                  | 468  | 452  | 16   | 3.4  |                  |
|       | chr4:187560876 | FAT1   | missense            | c.3641_3642delAGinsTA                 | p.Glu1214Val                | 281  | 270  | 11   | 3.9  |                  |
|       | chr4:187628886 | FAT1   | missense            | c.2096T>A                             | p.Val699Glu                 | 644  | 614  | 30   | 4.7  |                  |
|       | chr5:150924318 | FAT2   | missense            | c.6370G>A                             | p.Asp2124Asn                | 627  | 611  | 16   | 2.6  |                  |
|       | chr5:176636829 | NSD1   | missense            | c.1429A>G                             | p.Lys477Glu                 | 800  | 752  | 48   | 6.0  |                  |
|       | chr7:55238875  | EGFR   | missense            | c.1888G>A                             | p.Gly630Arg                 | 319  | 308  | 11   | 3.4  |                  |
|       | chr7:151860616 | KMT2C  | missense            | c.10046C>T                            | p.Pro3349Leu                | 259  | 244  | 15   | 5.8  |                  |
| EC_26 | chr7:151879637 | KMT2C  | missense            | c.5308A>G                             | p.Thr1770Ala                | 222  | 216  | 6    | 2.7  |                  |
|       | chr7:151945256 | KMT2C  | nonsense            | c.2263C>T                             | p.Gln755Ter                 | 1003 | 940  | 63   | 6.3  |                  |
|       | chr7:151962265 | KMT2C  | missense            | c.1042G>A                             | p.Asp348Asn                 | 473  | 457  | 16   | 3.4  |                  |
|       | chr9:139412278 | NOTCH1 | missense            | c.1367G>A                             | p.Cys456Tyr                 | 1209 | 1150 | 59   | 4.9  |                  |
|       | chr9:139412326 | NOTCH1 | missense            | c.1319G>T                             | p.Cys440Phe                 | 1277 | 1225 | 52   | 4.1  |                  |
|       | chr9:139412676 | NOTCH1 | missense            | c.1168A>G                             | p.Asn390Asp                 | 1607 | 1514 | 93   | 5.8  |                  |
|       | chr9:139412690 | NOTCH1 | missense            | c.1154C>A                             | p.Ser385Tyr                 | 1575 | 1481 | 94   | 6.0  |                  |
|       | chr9:139418261 | NOTCH1 | missense            | c.311A>C                              | p.Asn104Thr                 | 1254 | 1195 | 59   | 4.7  |                  |
|       | chr11:69466021 | CCND1  | missense            | c.859C>G                              | p.Pro287Thr                 | 836  | 805  | 31   | 3.7  |                  |
|       | chr16:3781885  | CREBBP | missense            | c.4782C>G                             | p.Asn1594Lys                | 432  | 423  | 9    | 2.1  |                  |
|       | chr17:7577094  | TP53   | missense            | c.844C>T                              | p.Arg282Trp                 | 283  | 277  | 6    | 2.1  | Yes <sup>d</sup> |
|       | chrX:44929089  | KDM6A  | missense            | c.2189C>A                             | p.Thr730Lys                 | 715  | 694  | 21   | 2.9  |                  |
| EC_28 | chr1:120479954 | NOTCH2 | missense            | c.3473G>A                             | p.Cys1158Tyr                | 858  | 534  | 324  | 37.8 |                  |
|       | chr2:178098949 | NFE2L2 | In-frameDeletion    | c.69_95delTTGGAGGCAAGATATAGATCTTGGAGT | p.Trp24_Val32del            | 374  | 204  | 170  | 45.5 |                  |
|       | chr11:69456241 | CCND1  | missense            | c.160C>T                              | p.Pro54Ser                  | 1210 | 917  | 293  | 24.2 |                  |
|       | chr17:7577551  | TP53   | missense            | c.730G>A                              | p.Gly244Ser                 | 1367 | 414  | 949  | 69.4 | Yes              |
| EC_29 | chr17:7577104  | TP53   | missense            | c.832C>A                              | p.Pro278Ser                 | 1447 | 1203 | 241  | 16.7 | Yes              |
|       | chr17:80789818 | ZNF750 | frameshiftDeletion  | c.512delA                             | p.Lys171fs                  | 1989 | 1538 | 451  | 22.7 |                  |
|       | chr17:7577094  | TP53   | missense            | c.844C>T                              | p.Arg282Trp                 | 989  | 588  | 401  | 40.5 | Yes              |
| EC_30 | chr17:7578256  | TP53   | missense            | c.578A>G                              | p.His193Arg                 | 1959 | 1241 | 707  | 36.1 | Yes              |
|       | chrX:44938585  | KDM6A  | nonsense            | c.3133G>T                             | p.Glu1045Ter                | 590  | 56   | 534  | 90.5 |                  |
| EC_31 | chr4:153244184 | FBXW7  | missense            | c.1973G>A                             | p.Arg658Gln                 | 864  | 585  | 279  | 32.3 |                  |
|       | chr17:7577498  | TP53   | splicesite          | c.782+1G>A                            |                             | 1999 | 1063 | 936  | 46.8 | Yes              |
|       | chr4:187629395 | FAT1   | frameshiftDeletion  | c.1586delT                            | p.Leu529fs                  | 1347 | 1121 | 226  | 16.8 |                  |
|       | chr4:187630547 | FAT1   | missense            | c.435G>C                              | p.Leu145Phe                 | 1430 | 1023 | 407  | 28.5 |                  |
|       | chr7:151842343 | KMT2C  | missense            | c.14069G>A                            | p.Arg4690Gln                | 1068 | 835  | 233  | 21.8 |                  |
|       | chr9:21971036  | CDKN2A | missense            | c.322G>C                              | p.Asp108His                 | 866  | 537  | 329  | 38.0 |                  |
|       | chr17:7577518  | TP53   | missense missense   | c.760_763delATCAinsTTCT               | p.Ile254_Ile255delinsPhePhe | 1984 | 1532 | 446  | 22.5 | Yes              |
|       | chr17:7579315  | TP53   | frameshiftInsertion | c.371_372insTG                        | p.Thr125fs                  | 1971 | 1512 | 459  | 23.3 | Yes              |
|       | chr17:80788986 | ZNF750 | nonsense            | c.1345G>T                             | p.Glu449Ter                 | 1355 | 771  | 584  | 43.1 |                  |
|       | chr19:10602845 | KEAP1  | missense            | c.733G>T                              | p.Val245Phe                 | 1999 | 1389 | 610  | 30.5 | Yes              |
| EC_33 | chr17:7578231  | TP53   | missense            | c.614A>G                              | p.Tyr205Cys                 | 1989 | 1865 | 123  | 6.2  | Yes <sup>d</sup> |
|       | chr17:7579356  | TP53   | missense            | c.331C>A                              | p.Leu111Met                 | 1993 | 1846 | 147  | 7.4  | Yes <sup>d</sup> |
|       | chr7:151878992 | KMT2C  | missense            | c.5953T>G                             | p.Ser1985Ala                | 819  | 248  | 571  | 69.7 |                  |
| EC_34 | chr7:151945204 | KMT2C  | missense            | c.2315C>T                             | p.Ser772Leu                 | 1621 | 646  | 975  | 60.1 |                  |
|       | chr17:7578291  | TP53   | splicesite          | c.560-2A>G                            |                             | 2000 | 359  | 1635 | 81.8 | Yes              |
| EC_35 | chr17:7577528  | TP53   | missense            | c.743G>A                              | p.Arg248Gln                 | 1992 | 1831 | 112  | 5.6  | Yes <sup>d</sup> |
|       | chr2:178098959 | NFE2L2 | missense            | c.86A>G                               | p.Asp29Gly                  | 2000 | 1477 | 523  | 26.2 | Yes              |
| EC_36 | chr17:7578190  | TP53   | missense            | c.659A>G                              | p.Tyr220Cys                 | 1560 | 846  | 714  | 45.8 | Yes              |
|       | chr17:7578371  | TP53   | missense            | c.559 G>C                             | p.Gly187Arg                 | 1936 | 1503 | 405  | 20.9 | Yes              |

<sup>a</sup> VAF: Variant allele frequen

<sup>b</sup> plasma DNA was evaluated by digital PCR

<sup>c</sup> This variant was evaluated by digital PCR, although the total allele was <200

<sup>d</sup> These variants were evaluated by digital PCR, although VAF was <10%

**Supplementary Table S4. Treatment and outcomes of ESCC patients**

| Patient ID | First line therapy | Followed treatment with curative intent | Achieved to curative status | Relapse | Relapse site | Outcome           |
|------------|--------------------|-----------------------------------------|-----------------------------|---------|--------------|-------------------|
| EC_1       | surgery            |                                         | yes                         | yes     | lung         | alive with cancer |
| EC_2       | DCF                | surgery                                 | yes                         | no      |              | alive             |
| EC_3       | DCF                |                                         | no                          |         |              | cancer death      |
| EC_4       | DCF                | CRT                                     | no                          |         |              | cancer death      |
| EC_5       | surgery            |                                         | yes                         | no      |              | alive             |
| EC_6       | CF                 | surgery                                 | yes                         | no      | lymph node   | alive             |
| EC_7       | DCF                | CRT                                     | yes                         | no      |              | alive             |
| EC_8       | DCF                |                                         | no                          |         |              | cancer death      |
| EC_9       | DCF                |                                         | no                          |         |              | cancer death      |
| EC_10      | DCF                |                                         | no                          |         |              | cancer death      |
| EC_11      | DCF                |                                         | no                          |         |              | cancer death      |
| EC_12      | surgery            |                                         | yes                         | no      |              | alive             |
| EC_13      | DCF                | CRT                                     | yes                         | no      | lymph node   | alive             |
| EC_14      | DCF                |                                         | no                          |         |              | cancer death      |
| EC_15      | DCF                |                                         | no                          |         |              | cancer death      |
| EC_16      | DCF                | surgery/CRT                             | yes                         | yes     | liver        | cancer death      |
| EC_17      | surgery            |                                         | yes                         | no      |              | alive             |
| EC_18      | DCF                | CRT                                     | yes                         | no      |              | alive             |
| EC_19      | DCF                |                                         | no                          |         |              | cancer death      |
| EC_20      | DCF                | surgery                                 | yes                         | no      |              | alive             |
| EC_21      | DCF                | surgery                                 | yes                         | no      |              | alive             |
| EC_22      | DCF                | surgery                                 | yes                         | no      |              | alive             |
| EC_23      | surgery            |                                         | yes                         | no      |              | alive             |
| EC_24      | DCF                | CRT                                     | No                          |         |              | cancer death      |
| EC_25      | DCF                | surgery                                 | yes                         | no      |              | non-cancer death  |
| EC_26      | DCF                | CRT                                     | no                          |         |              | cancer death      |
| EC_27      | surgery            |                                         | yes                         | no      |              | alive             |
| EC_28      | surgery            |                                         | yes                         | no      |              | alive             |
| EC_29      | DCF                |                                         | no                          |         |              | alive with cancer |
| EC_30      | CF                 | surgery                                 | yes                         | yes     | lymph node   | alive             |
| EC_31      | surgery            |                                         | yes                         | no      |              | alive             |
| EC_32      | DCF                | surgery                                 | yes                         | no      |              | alive             |
| EC_33      | DCF                | CRT                                     | no                          |         |              | cancer death      |
| EC_34      | surgery            |                                         | yes                         | no      |              | alive             |
| EC_35      | DCF                | CRT                                     | no                          |         |              | cancer death      |
| EC_36      | CF                 | surgery                                 | yes                         | no      |              | alive             |

Ce, Cervical esophagus ; Ut, upper thoracic esophagus; Mt, middle thoracic esophagus; Lt, Lower thoracic esophagus; DCF, Docetaxel/Cisplatin/5-FU; CF, Cisplatin/5-FU; CRT, chemoradiotherapy



**Supplementary Table S5. Univariate analysis of overall survival for 34 ESCC patients**

| Factors                                                   | HR   | 95%CI     | P value <sup>a</sup> |
|-----------------------------------------------------------|------|-----------|----------------------|
| Pretreatment status                                       |      |           |                      |
| Age ( $\geq 70$ / $< 70$ )                                | 0.89 | 0.32-2.38 | 0.81                 |
| Gender (Female/Male)                                      | 0.86 | 0.20-2.66 | 0.81                 |
| Locus (Upper and middle/Lower)                            | 0.63 | 0.20-1.74 | 0.38                 |
| Tumor depth (T1-3/T4)                                     | 0.19 | 0.06-0.52 | 0.0013*              |
| Node involvement (N0, N1/N2, N3)                          | 0.27 | 0.10-0.73 | 0.0101*              |
| Tumor volume ( $< 20\text{cm}^3$ / $\geq 20\text{cm}^3$ ) | 0.15 | 0.0-0.47  | 0.0007*              |
| Number of mutation ( $\geq 5$ / $\leq 4$ )                | 0.76 | 0.26-2.04 | 0.59                 |
| Pretreatment ctDNA (Negative/Positive)                    | 0.46 | 0.11-1.43 | 0.19                 |
| <i>NFE2L2</i> status (Wild type/Mutant)                   | 0.69 | 0.25-2.19 | 0.50                 |
| ctDNA dynamics <sup>b</sup>                               |      |           |                      |
| ctDNA decrease at landmark (Yes/No) <sup>a</sup>          | 0.08 | 0.01-0.32 | 0.0001*              |

<sup>a</sup>P values are derived from Kaplan-Meier log-rank test

<sup>b</sup>analysis of 21 patients with positive pre-treatment ctDNA levels

**Supplementary Table S6. dPCR-evaluated mutations duplicatedly detected in I**

| <b>gene</b>   | <b>Base change</b> | <b>Amino acid change</b> | <b>Cases</b> |       |       |       |
|---------------|--------------------|--------------------------|--------------|-------|-------|-------|
| <i>TP53</i>   | c.578A>G           | p.His193Arg              | EC_2         | EC_30 |       |       |
|               | c.578A>T*          | p.His193Leu              | EC_16        |       |       |       |
|               | c.614A>G           | p.Tyr205Cys              | EC_2         | EC_8  | EC_18 | EC_33 |
|               | c.659A>G           | p.Tyr220Cys              | EC_4         | EC_6  | EC_21 | EC_36 |
|               | c.730G>A           | p.Gly244Ser              | EC_17        | EC_28 |       |       |
|               | c.844C>T           | p.Arg282Trp              | EC_26        | EC_30 |       |       |
| <i>NFE2L2</i> | c.246A>T           | p.Glu82Asp               | EC_3         | EC_4  | EC_19 |       |

dPCR, digital PCR

\*different base change at the same genome position; Forward, reverse primers, and probe for wild type alleles were shared for dPCR analyses

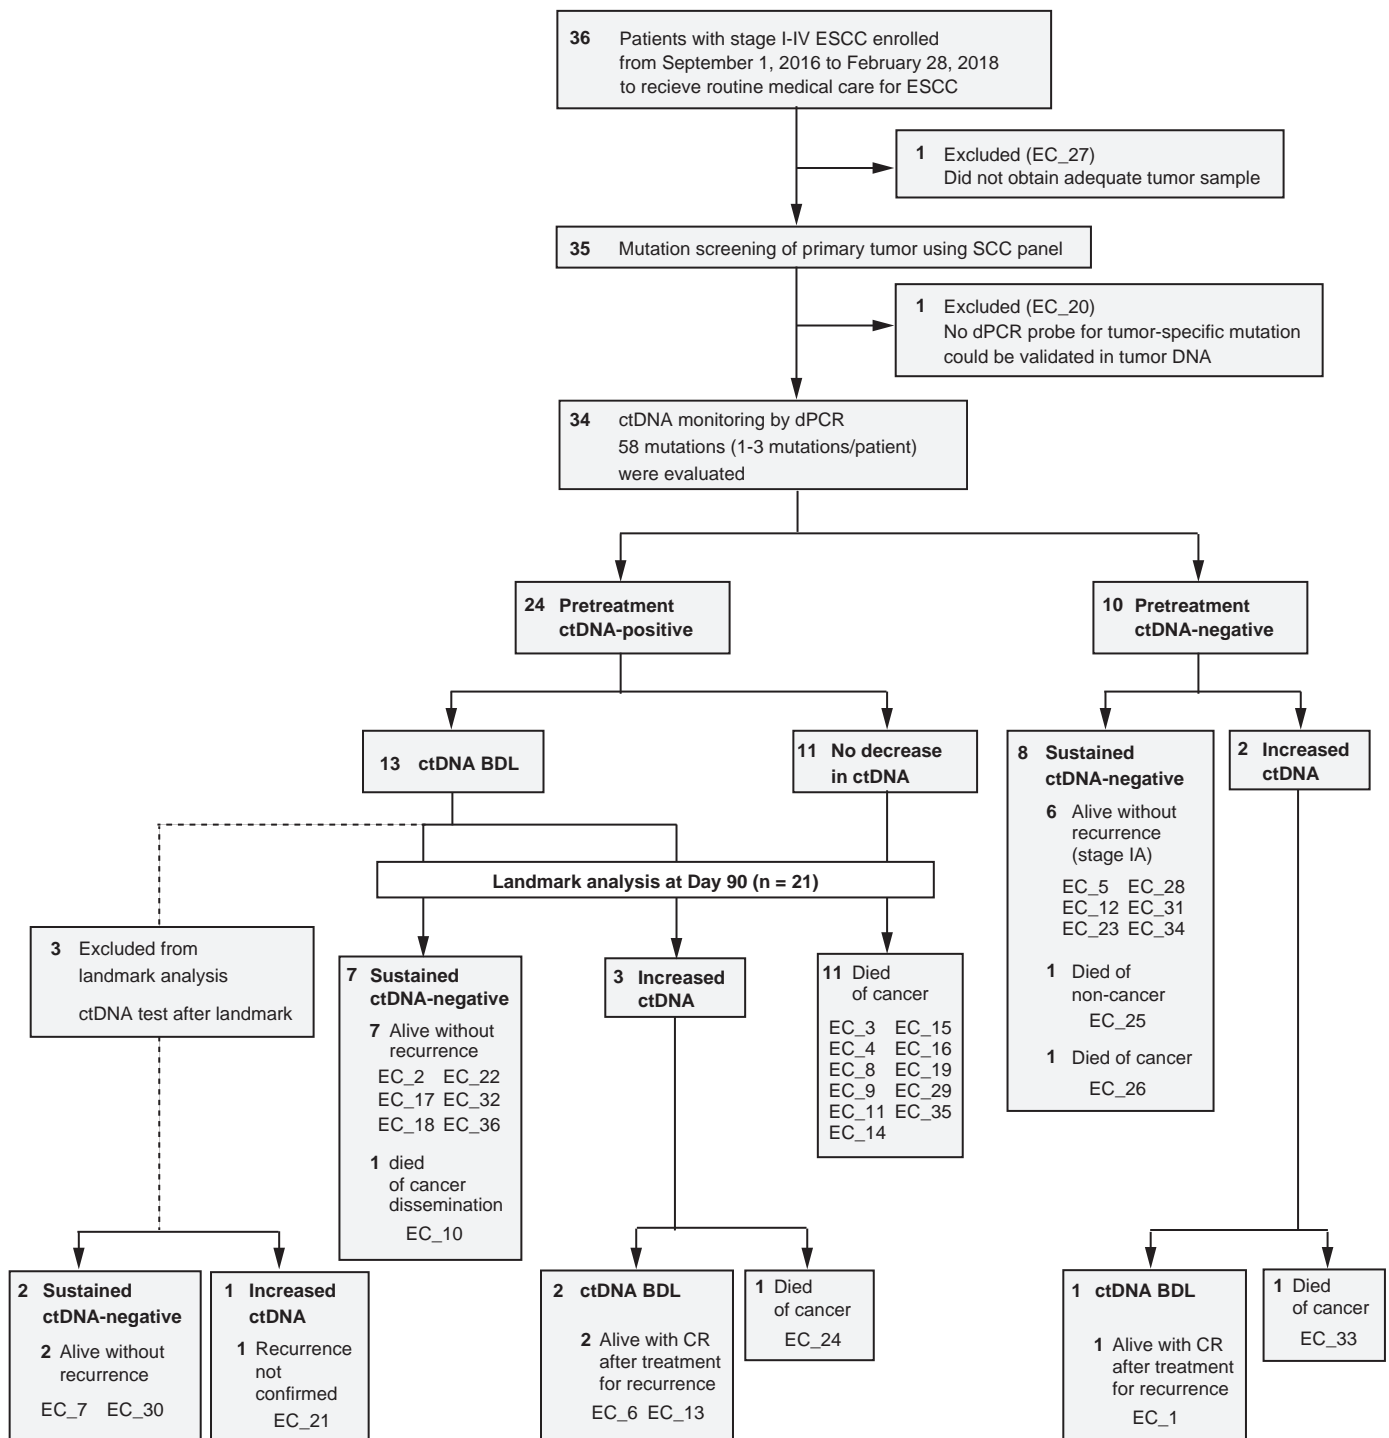

**Supplementary Figure S1. Flow chart of patient outcomes**

BDL, below detection limit; ctDNA, circulating tumor DNA; dPCR, digital PCR; ESCC, esophageal squamous cell carcinoma; SCC panel, squamous cell cancer panel.

## BCT

preserve up to 9 days  
at room temp

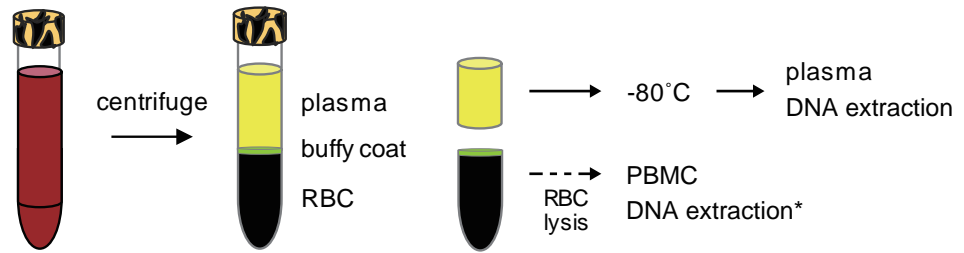

## BCT-CPT

preserve up to 9 days  
at room temp

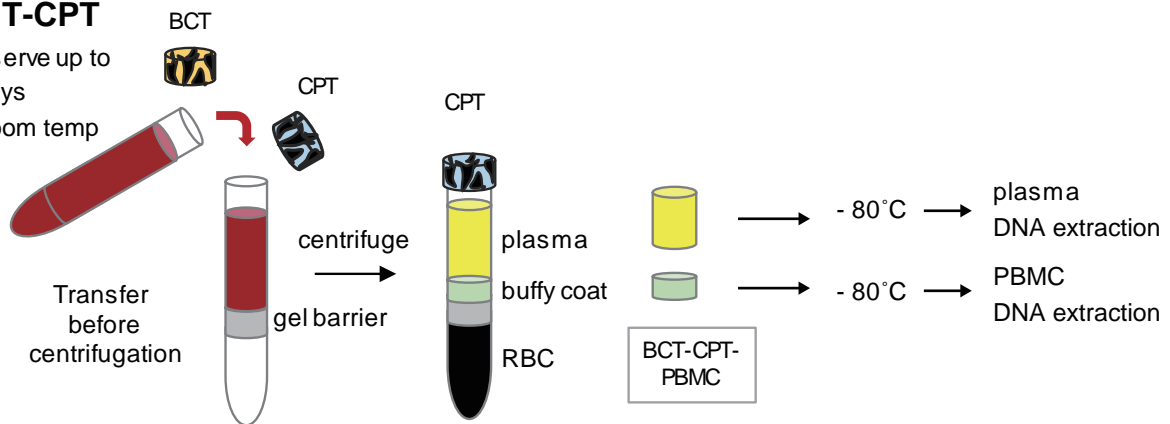

## CPT

centrifuge  
within 2 hrs of  
blood collection  
at room temp

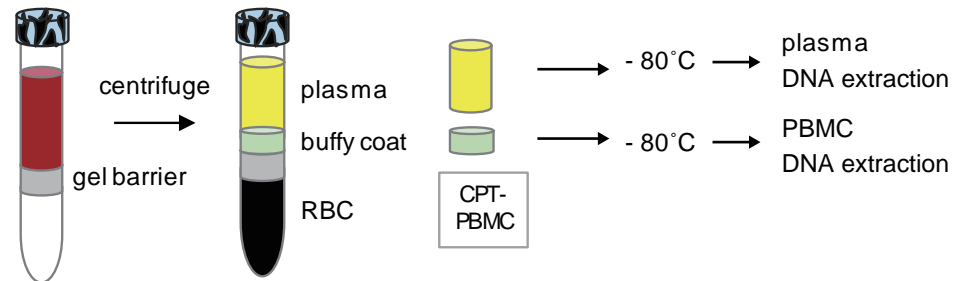

### Supplementary Figure S2. Blood sample collection processes

Bottom: BCT tube. Top: CPT tube. Middle: combinatory tube method. CPT, Cell Preparation Tubes. BCT, Cell-Free DNA Blood Collection Tubes. RBC, red blood cell. PBMC, peripheral blood mononuclear cell. Asterisk, PBMC DNA can be extracted from remaining blood mixed with RBC and white blood cells using a Gentra Puregene Blood Kit (Qiagen, Hilden, Germany).

**A**

EC\_8

*TP53* c.614A>G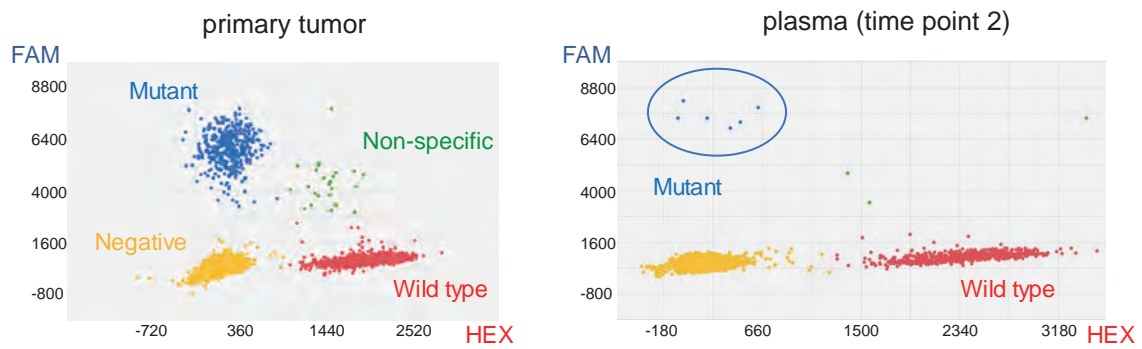**B**

EC\_21

*TP53* c.659A>G  
plasma (time point 5)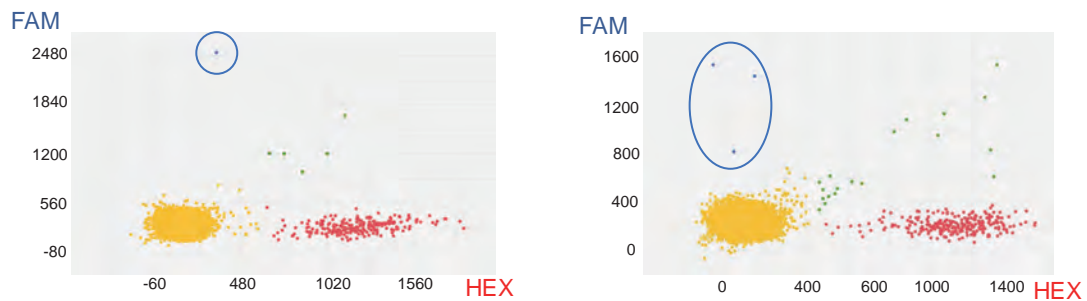

EC\_1

*TP53* c.536A>G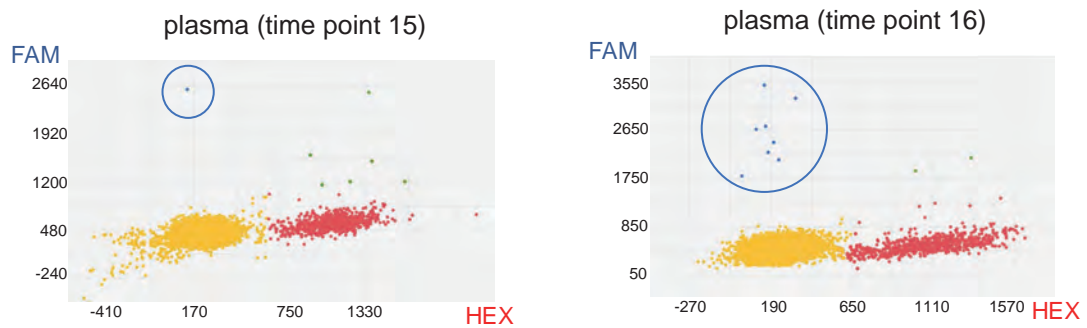

EC\_6

plasma (time point 1)

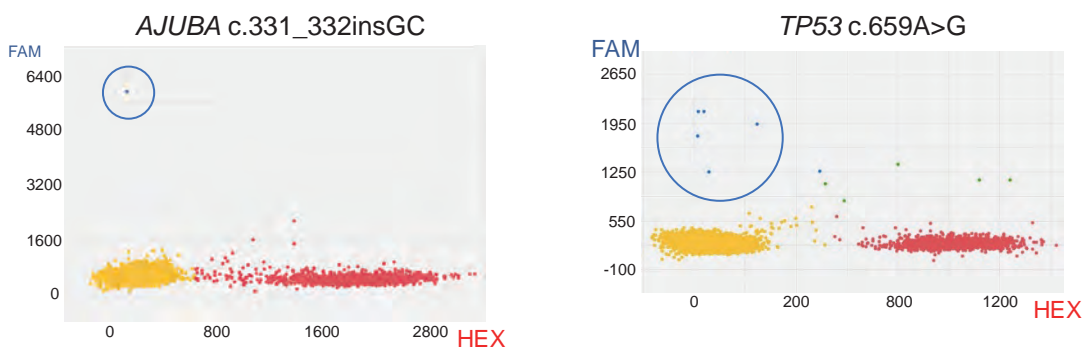**Supplementary Figure S3. ctDNA detection by digital PCR**

(A) dPCR analysis in primary tumor and plasma samples. A specifically designed primer/probe set for the tumor-specific mutation *TP53* c.614A>G was validated using primary tumor DNA (left). After validation, ctDNA was counted in plasma DNA samples (right). (B) Criteria of positive-ctDNA determination. See eMethods 6. FAM, carboxyfluorescein.

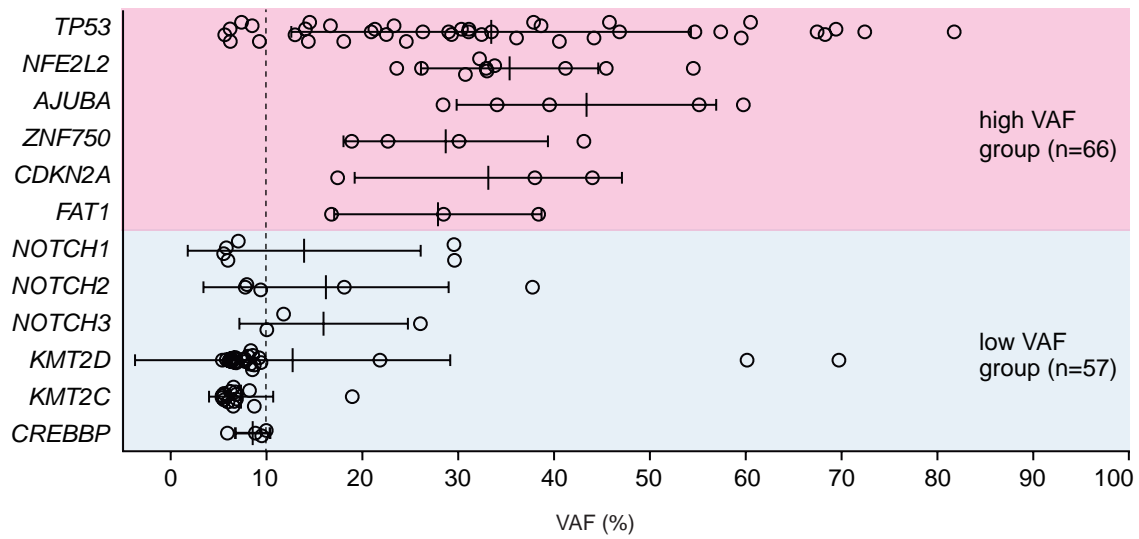

**Supplementary Figure S4. Variant allele frequencies of mutated genes in primary tumors**

VAF of genes that were mutated in 3 or more cases are shown. Average VAFs of 6 genes including *TP53*, *NFE2L2*, *AJUBA*, *ZNF750*, *CDKN2A*, and *FAT1* were >20% ( $33.9 \pm 35.7$ ), while those for the remaining 6 genes including *NOTCH* family genes as well as *KMT2C*, *KMT2D*, and *CREBBP* were <20% ( $11.6 \pm 24.6$ ).

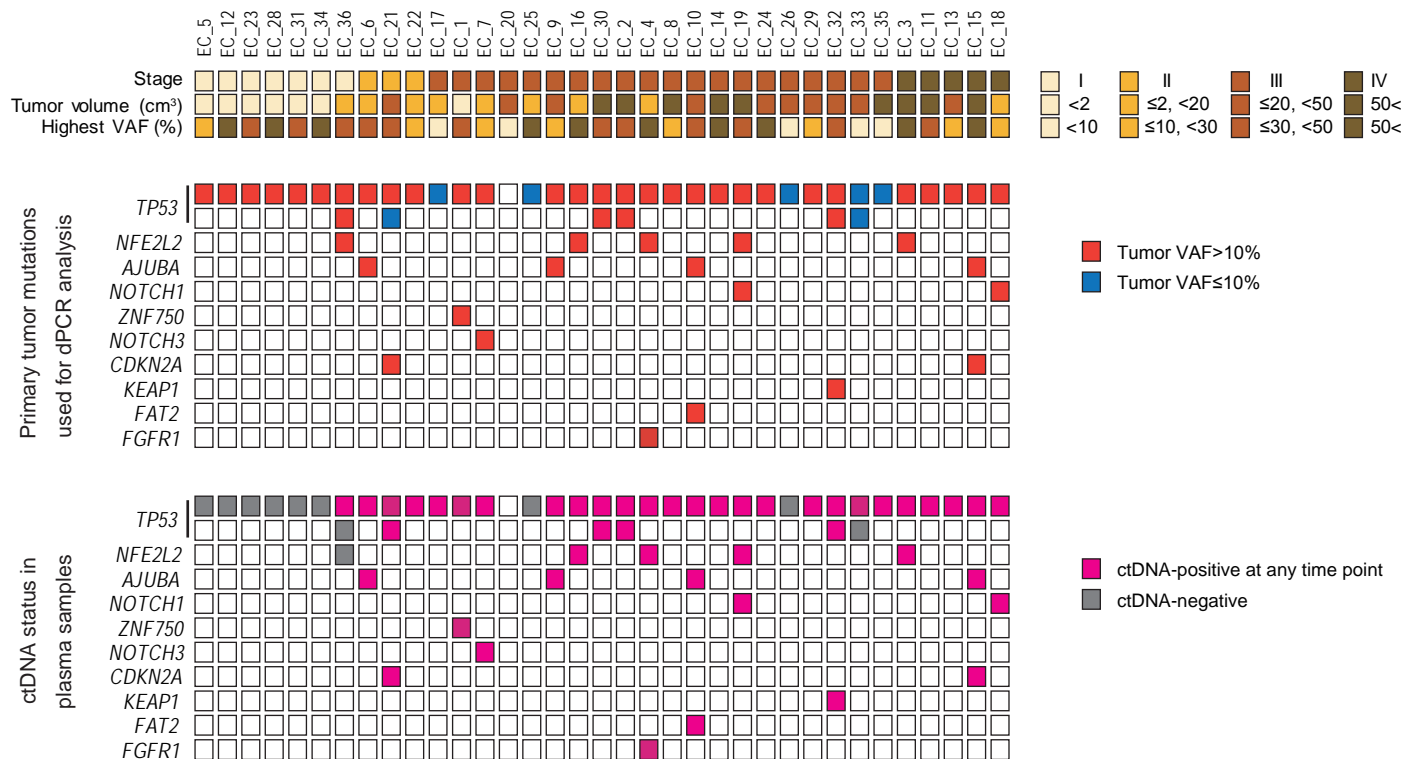

### Supplementary Figure S5. Primary tumor-specific mutations and ctDNA in pretreatment plasma

TNM stage, tumor volume, and highest VAF of primary tumor mutation are shown in the top panel. Tumor-specific mutations validated by specifically-designed probes/primers for tumor DNA are colored in the middle panel. Red boxes, primary tumor VAF  $\geq 10\%$  by NGS analysis; blue boxes, primary tumor VAF  $< 10\%$  by NGS analysis. ctDNA status by dPCR of each mutation is shown in the bottom panel. Red boxes, ctDNA positive; gray boxes, ctDNA negative. ctDNA, circulating tumor DNA; dPCR, digital PCR; VAF, variant allele frequency.

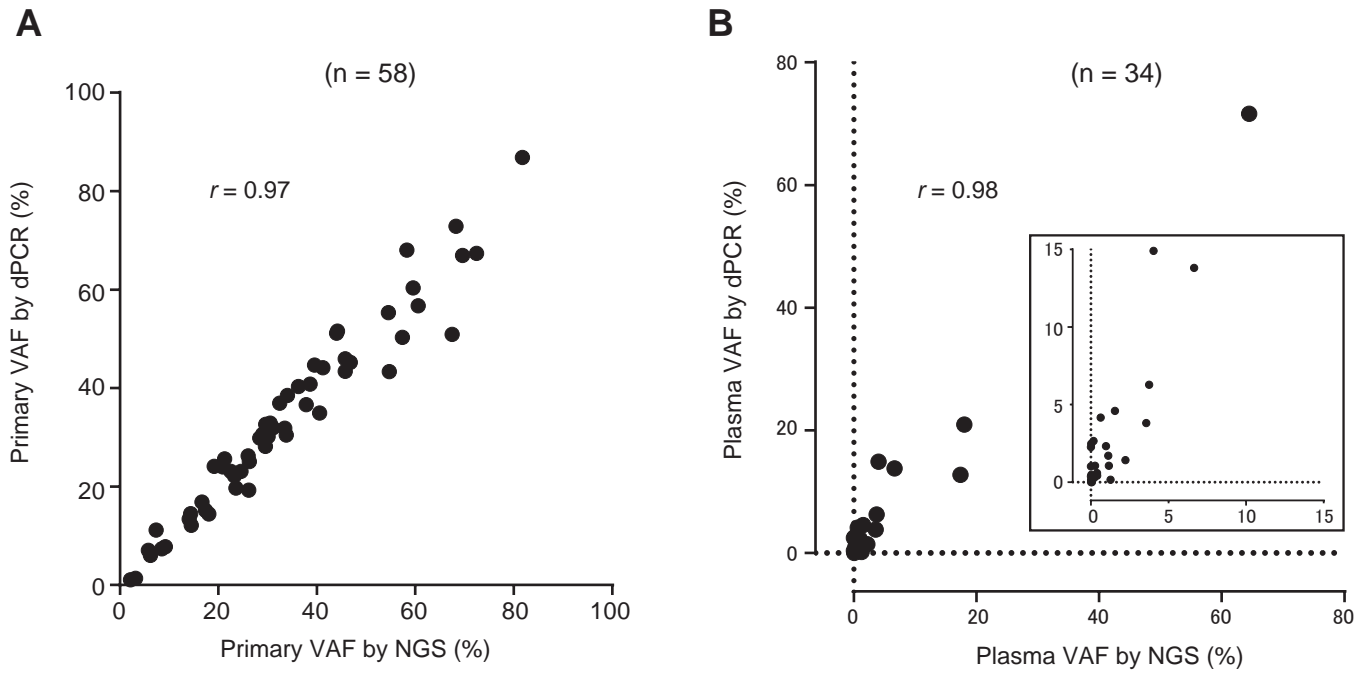

**Supplementary Figure S6. Correlation between VAFs measured by NGS and dPCR**

(A) Correlation between primary tumor VAFs measured by NGS and dPCR for 58 mutations (eTable 3; Spearman' s rank correlation coefficient). (B) Correlation between ctDNA VAFs of *TP53* mutations measured by NGS and dPCR (Spearman' s rank correlation coefficient). A total of 34 *TP53* mutations were detected in 28 patients having Stage IB or higher disease were evaluated. ctDNA, circulating tumor DNA; dPCR, digital PCR; NGS, next generation sequencing; VAF, variant allele frequency.



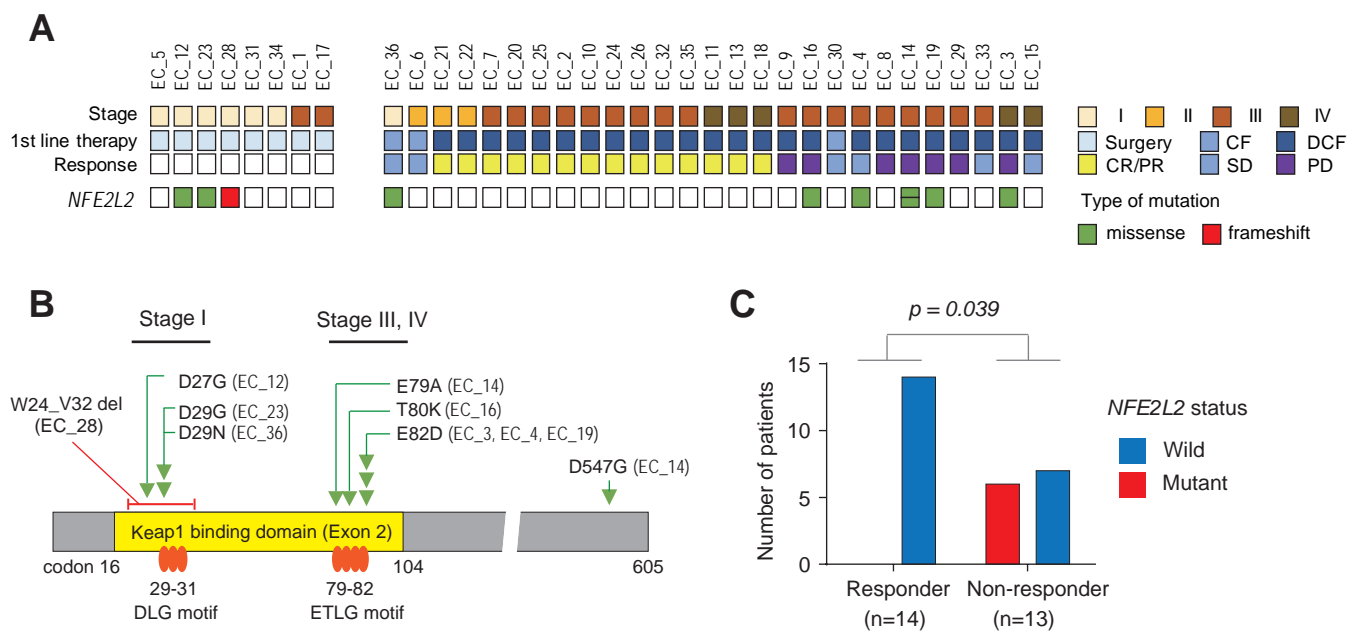

**Supplementary Figure S7. NFE2L2 mutations in primary tumors and chemotherapeutic response**

(A) *NFE2L2* mutations and treatments for ESCC patients. First line therapies, response, and *NFE2L2* mutation are shown. (B) Mutation positions in the *NFE2L2* gene. The genetic position of *NFE2L2* mutations detected in primary tumors. CF, cisplatin/5-FU; CR, complete response; DCF, docetaxel/cisplatin/5-FU; dPCR, digital PCR; PD, progressive disease; PR, partial response; SD, stable disease. (C) Number of patients with *NFE2L2* status among chemotherapy responders and non-responders. Comparisons between Responders and Non-responders were performed by  $\chi$  square test.

## **Supplementary Figure S8. Case presentations**

Abbreviations in the case descriptions

BDL, below detection limit; CEA; carcinoembryonic antigen; CF, cisplatin/5-FU;  
CIS, carcinoma in situ; CR, complete response; CYFRA 21-1, cytokeratin 19 fragments; DCF,  
docetaxel/cisplatin 5-FU; CRT, chemoradiotherapy; LN, lymph node;  
PD, progressive disease; PT, proton beam therapy; PTX, paclitaxel; PR, partial response; RT,  
radiotherapy; SCC, squamous cell carcinoma antigen; SD, stable disease;

## EC\_1 Stage IIIA

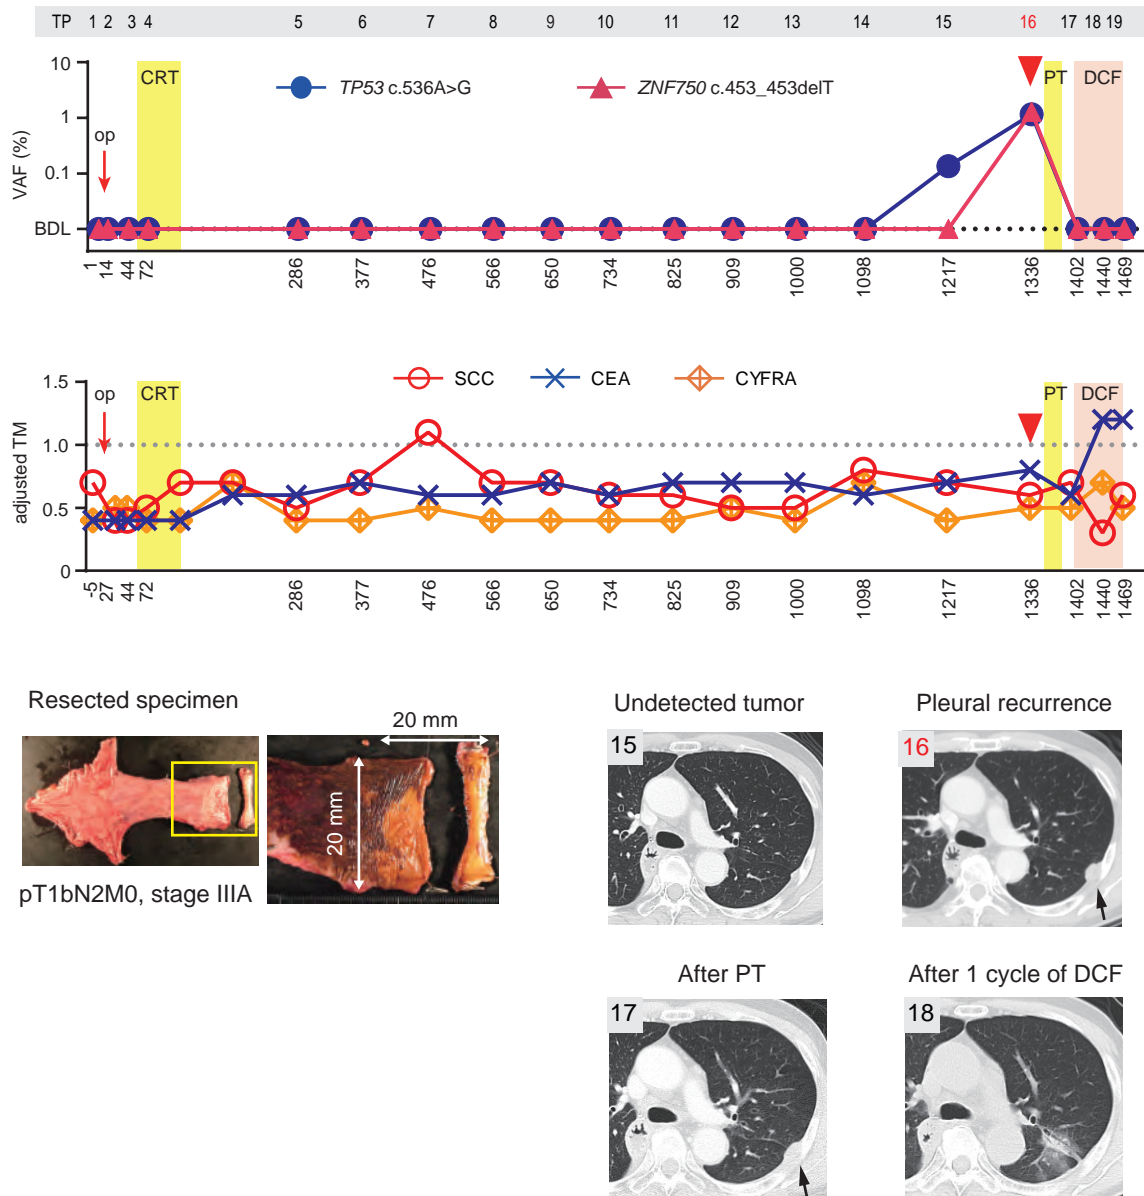

EC\_1 had a superficial ESCC in the upper third of the esophagus and metastasis could not be detected in a pre-treatment CT scan. Surgical resection was undertaken as first line therapy. Whole and enlarged images of the resected specimen are presented. Microscopically, primary tumor with submucosal invasion and three mediastinal lymph node metastases were observed. Resected margin of the primary tumor on the oral side of the esophagus was not sufficient and adjuvant CRT was followed. In addition, ctDNAs of *TP53* c.536A>G and *ZNF750* c.453\_453delT were not detected in plasma DNA from pretreatment to TP 14. A left pleural nodule was evident at day 1,336 (TP16, arrow), but neither CT scan nor tumor marker could determine whether this tumor was secondary primary lung cancer, ESCC recurrence, or other non-specific findings. However, as ctDNAs for both mutations were detected at TP16, the tumor could be diagnosed as ESCC recurrence. In addition, ctDNA of *TP53* c.536A>G was already elevated 4 months before tumor detection by CT scan (TP15). After proton beam therapy, the tumor was reduced and ctDNA decreased to zero at day 1,402 (TP 17). The tumor became undetectable after 1 additional cycle of DCF (TP 18). Red arrowheads in the upper panels indicate the time point at which recurrence was clinically evident.

## EC\_2 Stage IIIC

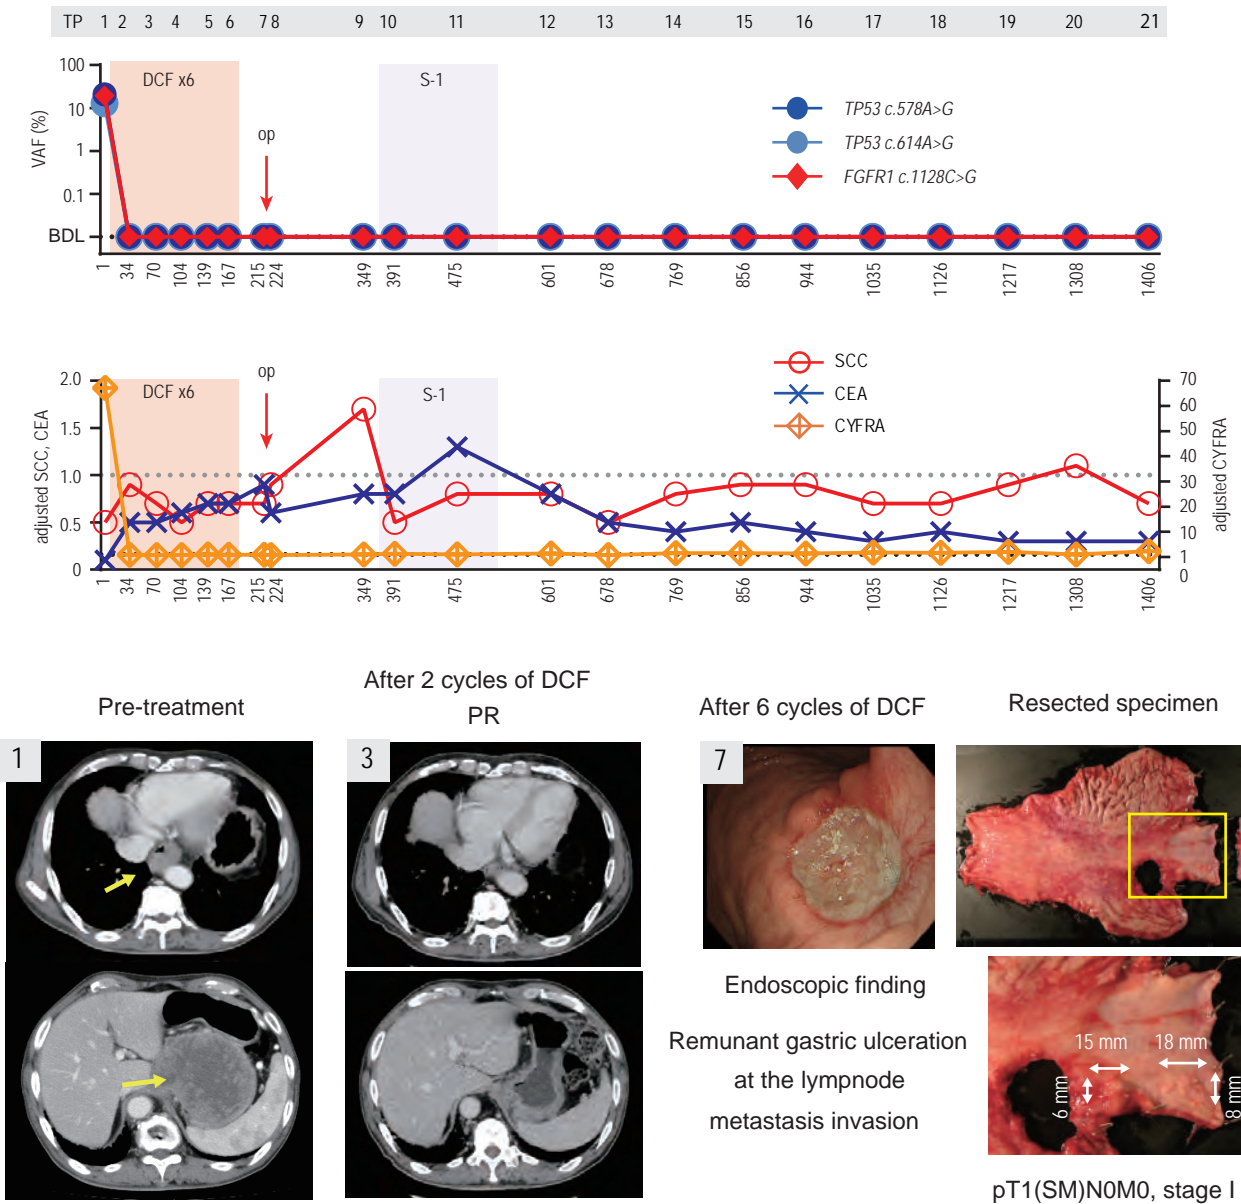

EC\_2 had a primary ESCC with adventitia invasion in the lower third of the esophagus and significant abdominal lymph node metastasis that had invaded the stomach (TP 1, arrows). Marked tumor shrinkage was achieved after 2 cycles of DCF (TP 3). After 6 cycles of DCF, a remnant of the primary ESCC tumor and a deep gastric ulcer were endoscopically observed in the stomach wall where the abdominal lymph node metastasis had invaded before administration of chemotherapy (TP 7). In the resected specimen, remnant tumor cells were limited to the submucosal layer in areas of the gastroesophageal junction (15 x 6 mm<sup>2</sup>) and the lower esophagus (18 x 8 mm<sup>2</sup>) (TP 7). Patient-specific ctDNAs were monitored using three patient-specific mutations in *TP53* c.578A>G, *TP53* c.614A>G, and *FGFR1* c.1128C>G. After one cycle of DCF, levels of all ctDNAs were decreased below the detection limit and were sustained as ctDNA-negative until TP 21 with no recurrence.

EC\_3 Stage IV

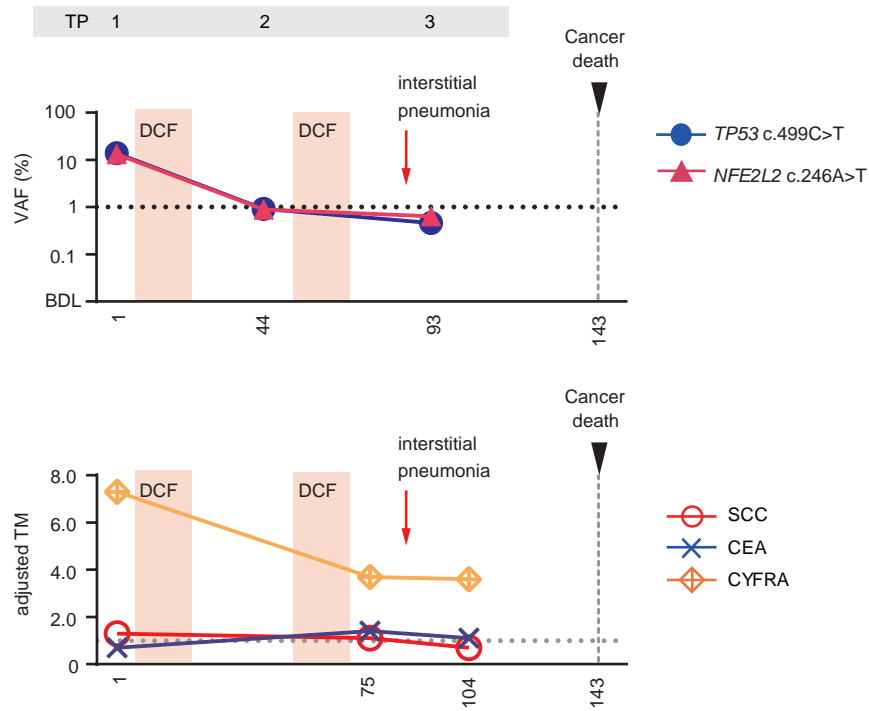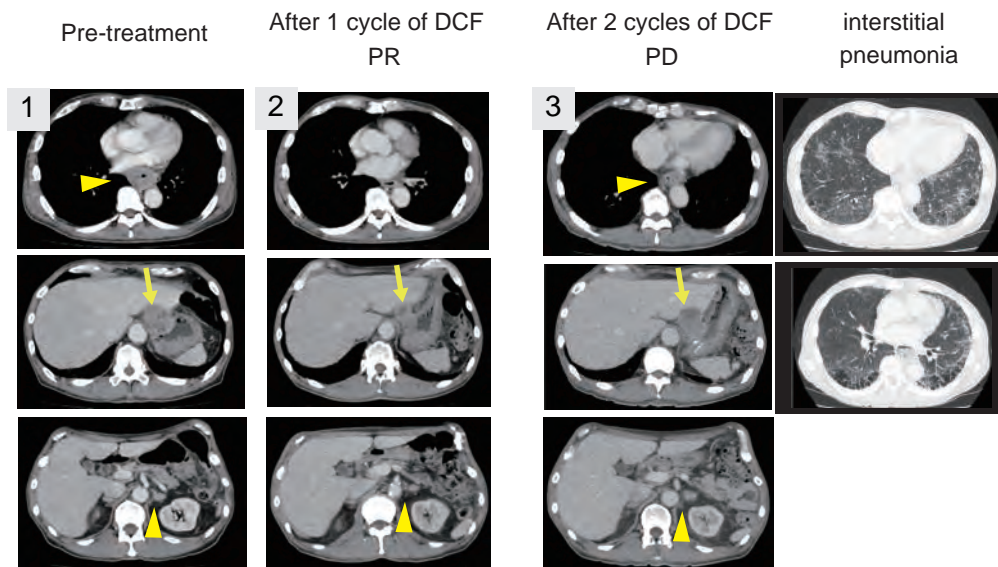

EC\_3 had a primary ESCC with adventitia invasion in the middle third of the esophagus (horizontal arrowhead), multiple abdominal lymph node metastases (arrows), and hematogenous metastasis in the left adrenal gland (vertical arrowhead) (TP 1-3). Although the tumor size was temporarily reduced after the first cycle of DCF, the patient had tumor regrowth and interstitial pneumonia by the end of the second cycle of DCF. The patient died of cancer progression on Day 143. In pre-treatment plasma, the ctDNA levels of *TP53* c.499C>T and *NFE2L2* c.246A>T were 13.80% and 13.27%, respectively. Levels of ctDNA for both mutations decreased to <1% after chemotherapy but remained detectable.

EC\_4 Stage IIIC

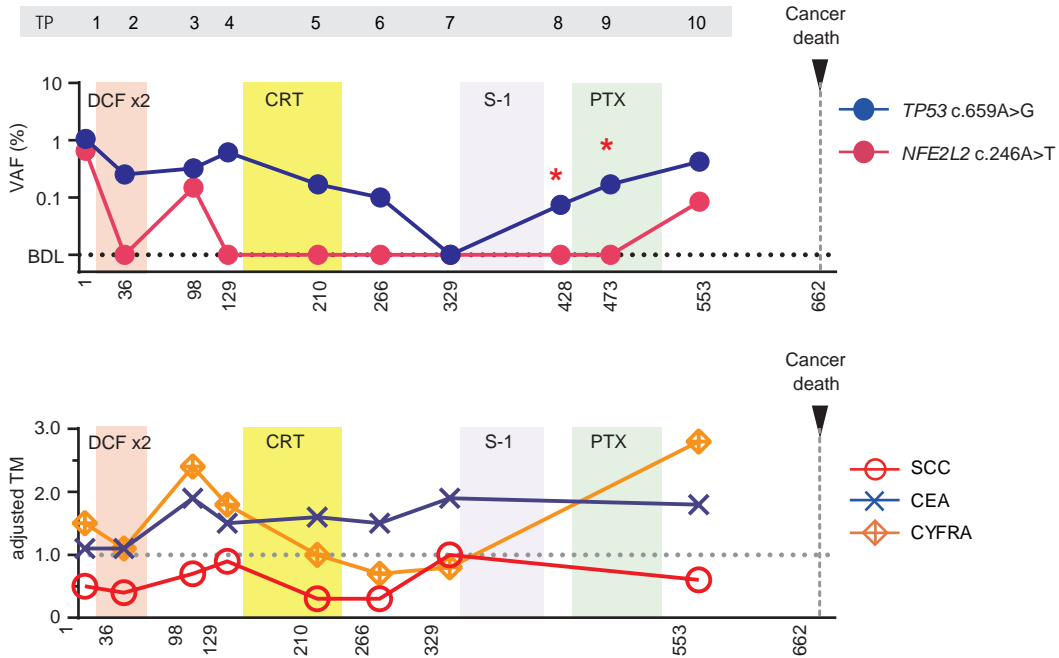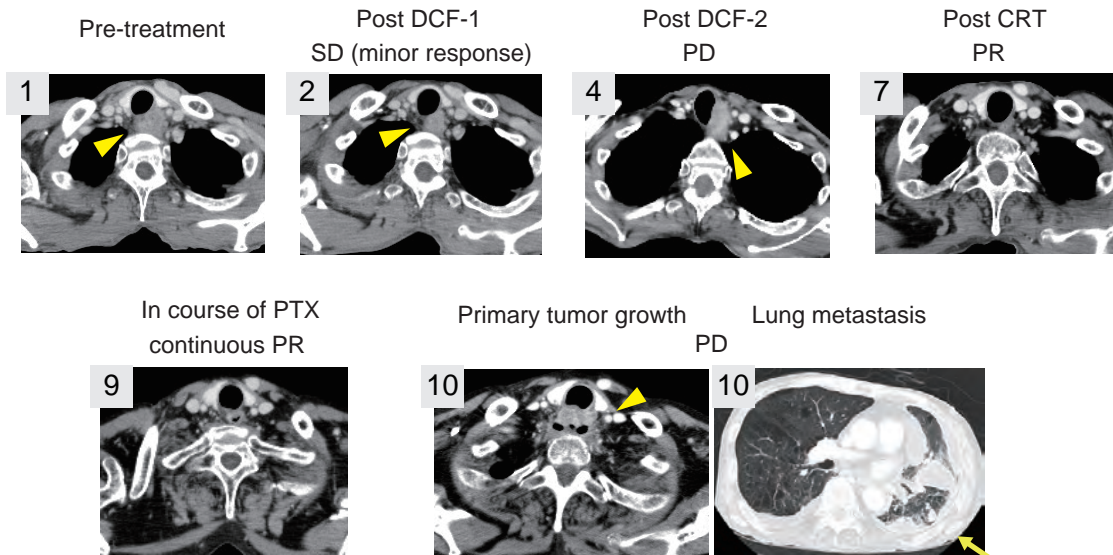

EC\_4 had cervical ESCC that invaded to the trachea (TP 1). Minor response was observed after the first cycle of DCF chemotherapy (TP 2); the tumor showed regrowth after the second cycle of DCF (TP 4). Remarkable shrinkage of the tumor was observed after CRT (TP 7). The level of *TP53* c.659A>G ctDNA was temporarily decreased below the detection limit after CRT. Due to adverse effects including diarrhea and dehydration, S-1 chemotherapy was changed to weekly paclitaxel therapy. Primary tumor regrowth and lung metastasis were detected by CT (TP 10). The patient died of cancer on Day 662. Arrowheads and arrow indicate primary tumor and lung metastasis, respectively. Asterisks indicate early elevation of ctDNA before tumor regrowth was confirmed by CT.

EC\_5 Stage IA

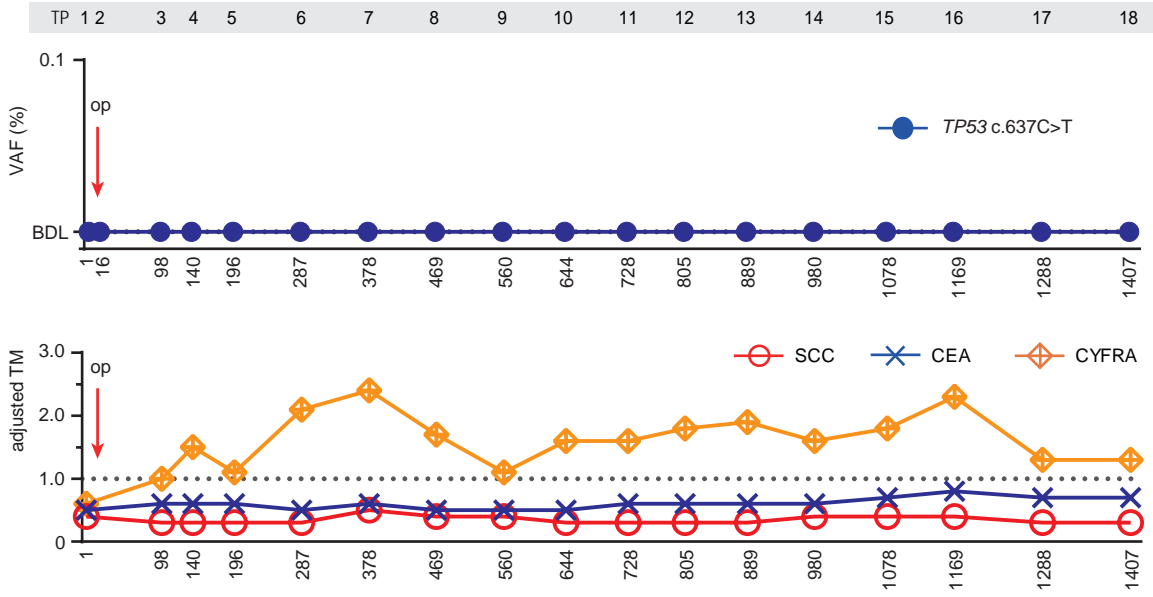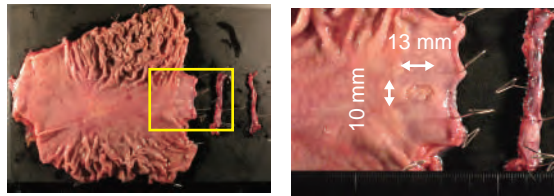

Resected specimen  
pT1bN0M0, stage IA

EC\_5 had surgical resection for superficial ESCC in the abdominal esophagus. The tumor was 13 x 10 mm<sup>2</sup> and microscopically the invasion was limited to the submucosal layer. No lymph node metastasis was observed.

EC\_6 Stage IIA

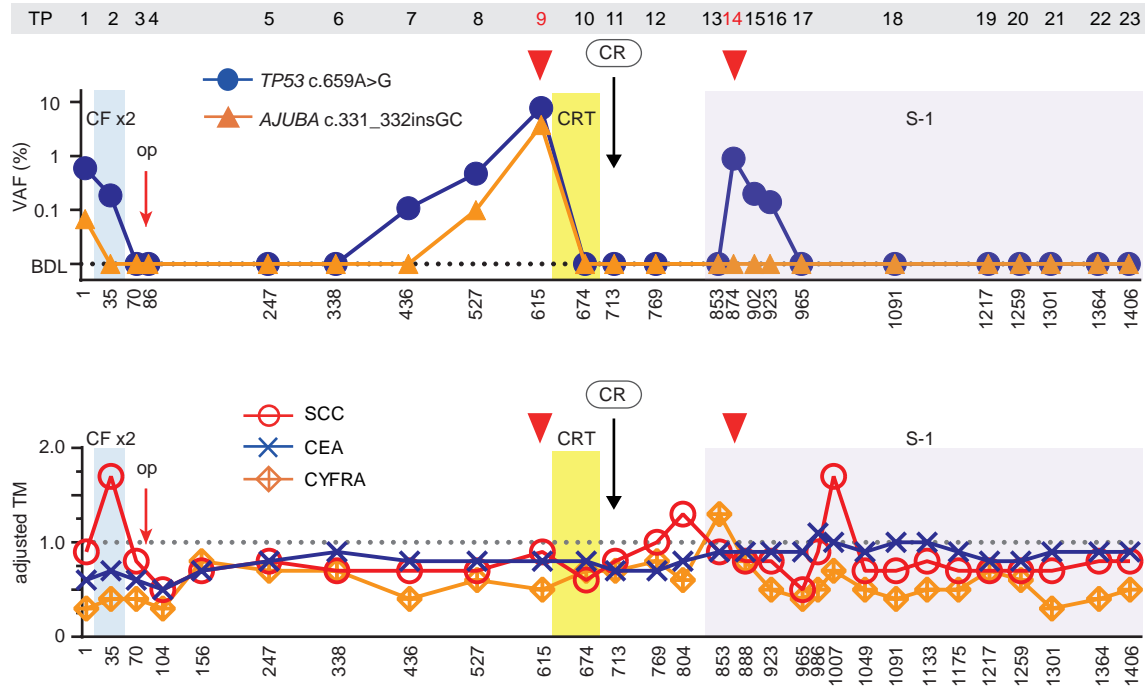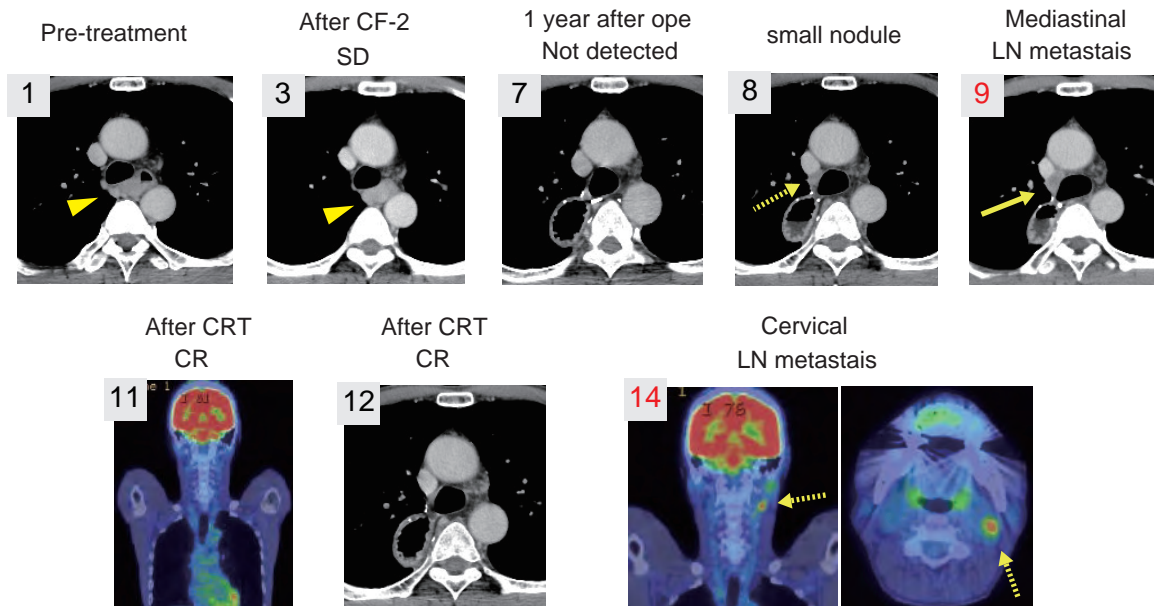

EC\_6 had a primary ESCC with adventitia invasion in the upper third of the esophagus and no lymph node metastasis (TP 1). This case was diagnosed T3N0M0, Stage IIA. Two cycles of neoadjuvant CF followed by surgical resection were completed. Adventitia invasion by the primary tumor and negative lymph node metastasis were also confirmed pathologically. At 18 months (545 days) after surgical resection, a 8 x 4 mm<sup>2</sup> mediastinal tracheal lymph node metastasis was detected by CT scan (TP 9). The patient achieved CR after CRT for the mediastinal lymph node (TP 11). The patient received an oral adjuvant therapy of S-1 for one year. Red arrowheads in the upper panels indicate the time point when recurrence is clinically evident. Yellow arrowheads and arrows in CT images indicate primary tumor and lymph node metastasis, respectively. Dashed arrows indicate lesions classified as non-specific findings at the time of diagnosis.



EC\_7 Stage IIIA

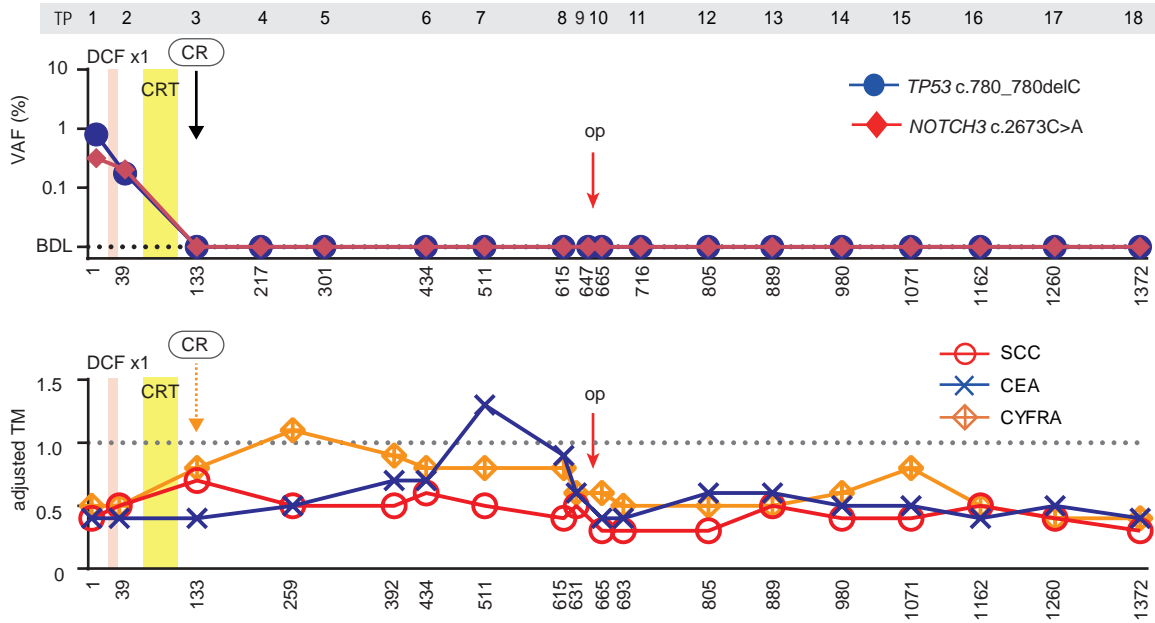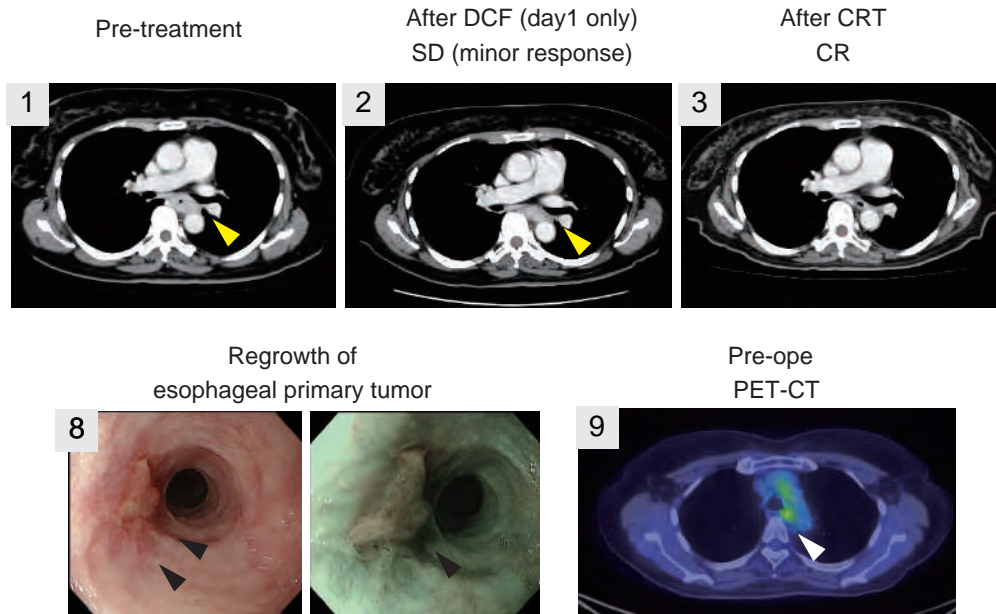

EC\_7 had a primary ESCC with adventitia invasion in the middle and upper third of the esophagus with a mediastinal lymph node metastasis. This case was diagnosed as T3N1M0, Stage IIIA. Although chemotherapy with DCF was initiated, the treatment was aborted on Day 2 of the first cycle due to liver dysfunction. An alternative CRT with low-dose cisplatin and 5-FU achieved CR. After 1.5 yr, an esophageal tumor with a mild FDG accumulation was observed on PET-CT scan (TP 8 and 9). A salvage esophagectomy was performed and cancer cells were not observed in the resected specimen. Recurrence was not observed until Day 1,372. Yellow arrowheads in CT images indicate the primary tumor. Black arrowheads in endoscopic images and a white arrowhead in PET-CT image indicate a non-malignant esophageal tumor.

EC\_8 Stage IIIC

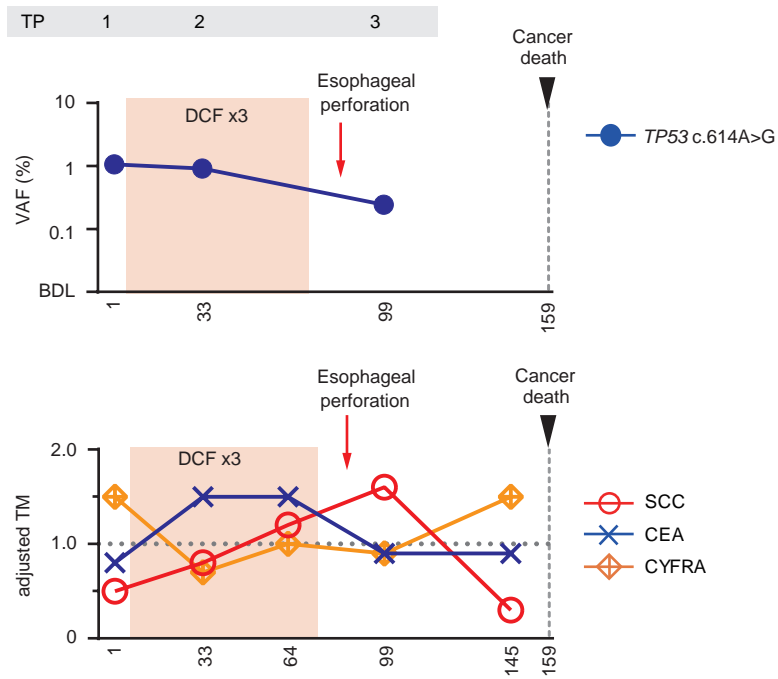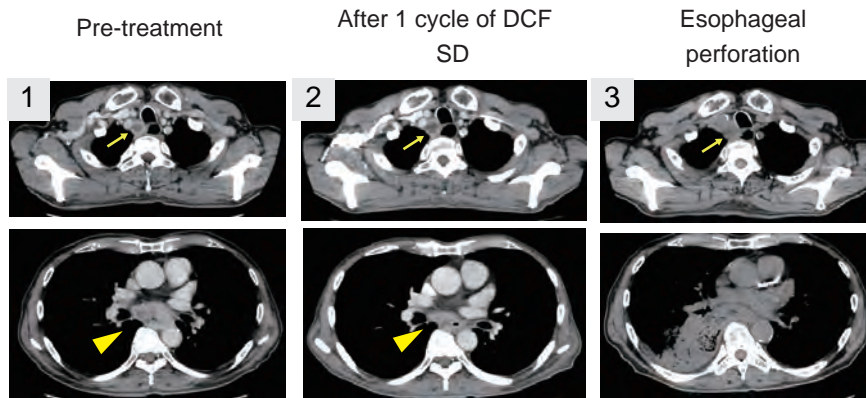

EC\_8 had an ESCC in the middle, upper and lower third of the esophagus that had invaded the right lung and right subcranial recurrent nerve; metastasis to the main bronchus lymph nodes also occurred (TP 1). This case was diagnosed as T4bN2M0, Stage IIIC. After 3 cycles of DCF, penetration of the esophageal primary tumor into the right lung was observed (TP 3). The patient died of cancer progression on Day 159.

## EC\_9 Stage IIIB

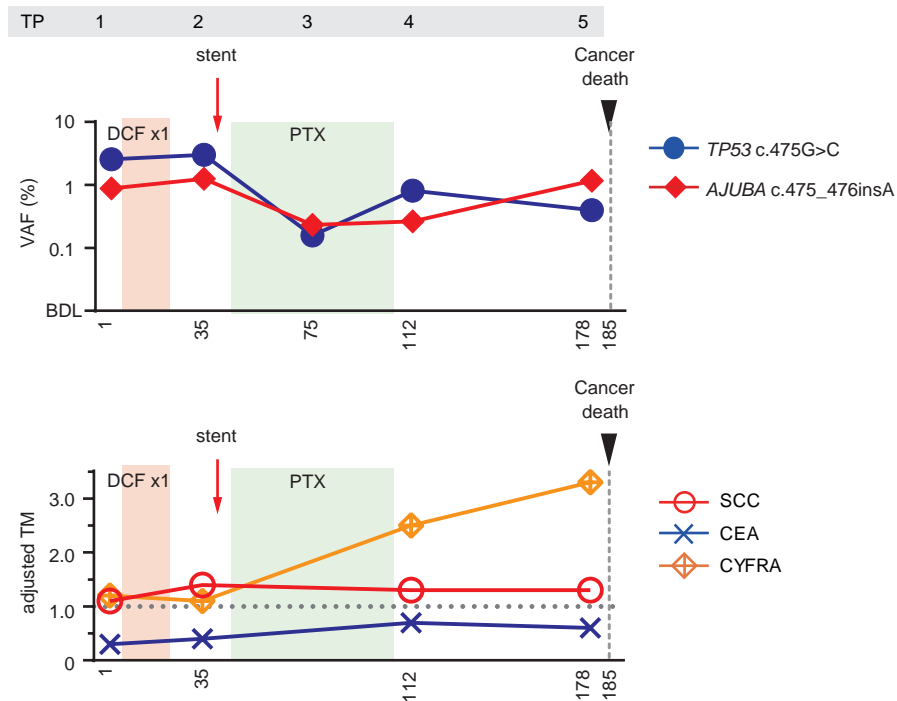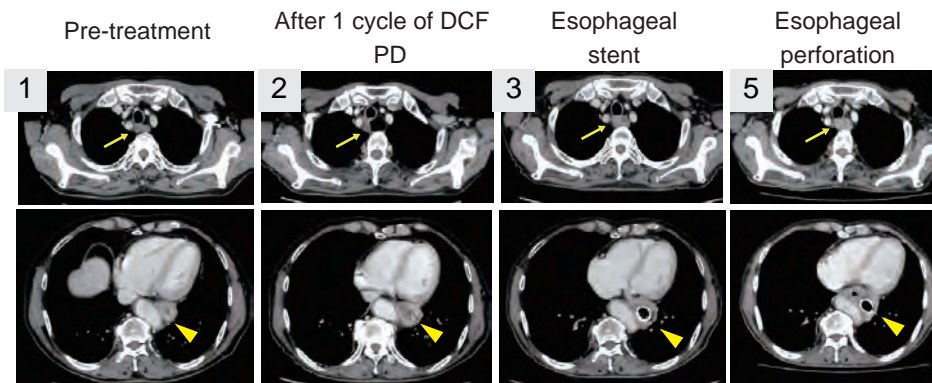

EC\_9 had a primary ESCC with adventitia invasion in the middle and lower third of the esophagus. Metastatic sites including a bilateral recurrent nerve lymph node and lesser curvature lymph node of the stomach along with branches of the left gastric artery were observed. This case was diagnosed T3N2M0, Stage IIIB. Disease progression was observed after the first cycle of DCF, and an esophageal stent was then placed at the stricture of the primary tumor (TP 2 and 3). Although paclitaxel was given weekly for two months, the patient died of cancer progression on Day 185. Esophageal perforation was also observed by CT scan at TP 5. Arrowheads and arrows indicate primary tumor and lymph node metastasis, respectively.

EC\_10 Stage IIIC

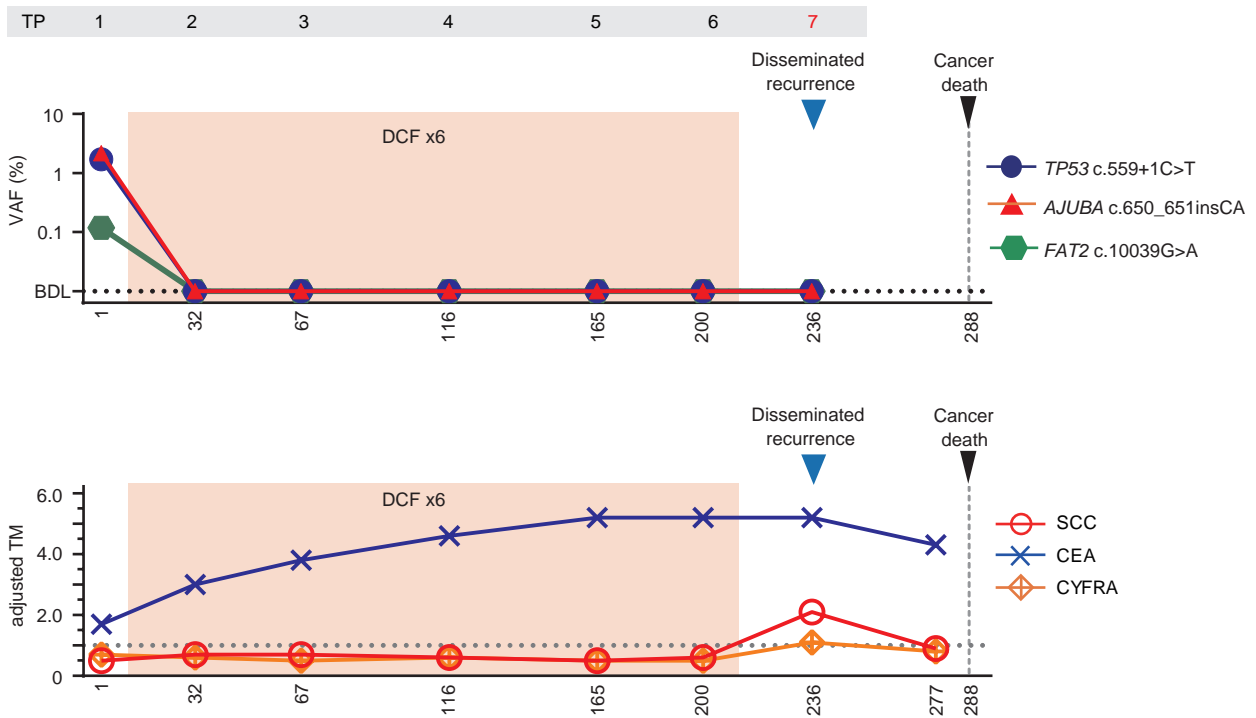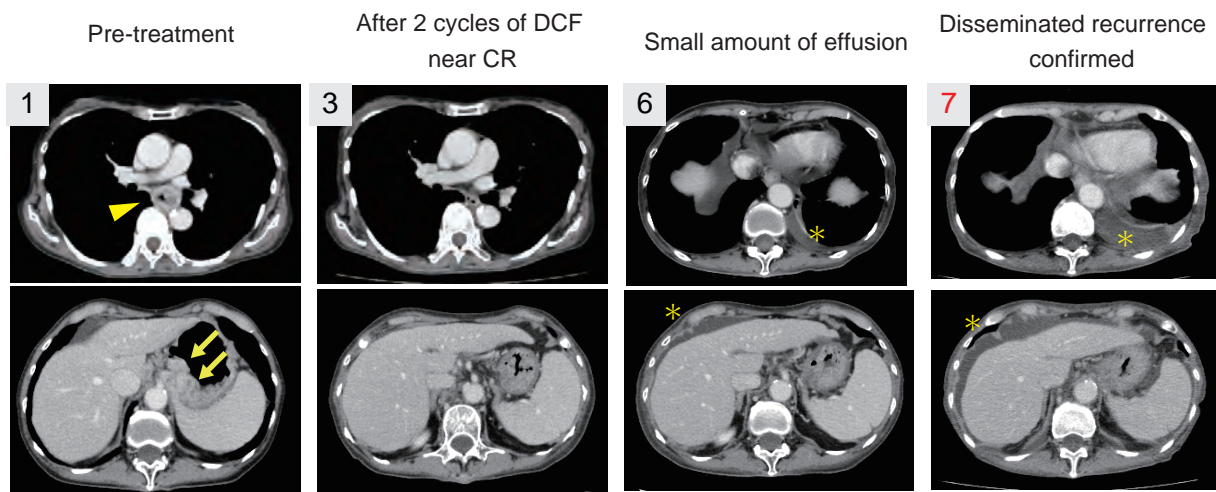

EC\_10 had a primary ESCC with adventitia invasion in the lower third of the esophagus and abdominal lymph node metastasis that invaded to the stomach (TP 1). Remarkable tumor shrinkage was observed after the first 2 cycles of DCF, whereas ctDNA levels of all mutations were decreased below the detection limit after the first cycle of DCF (TP 2). However, after 5 cycles of DCF, a small amount of effusion was detected by CT scan (TP 6). Pleural effusion and ascites rapidly increased and the patient died of disseminated recurrence 2 months after diagnosis. Blue arrowheads in the upper panels indicate the time point when recurrence was clinically evident. The yellow arrowhead and arrows in CT images indicate primary tumor and lymph node metastases, respectively. Yellow asterisks indicate pleural effusion and ascites.

EC\_11 Stage IV

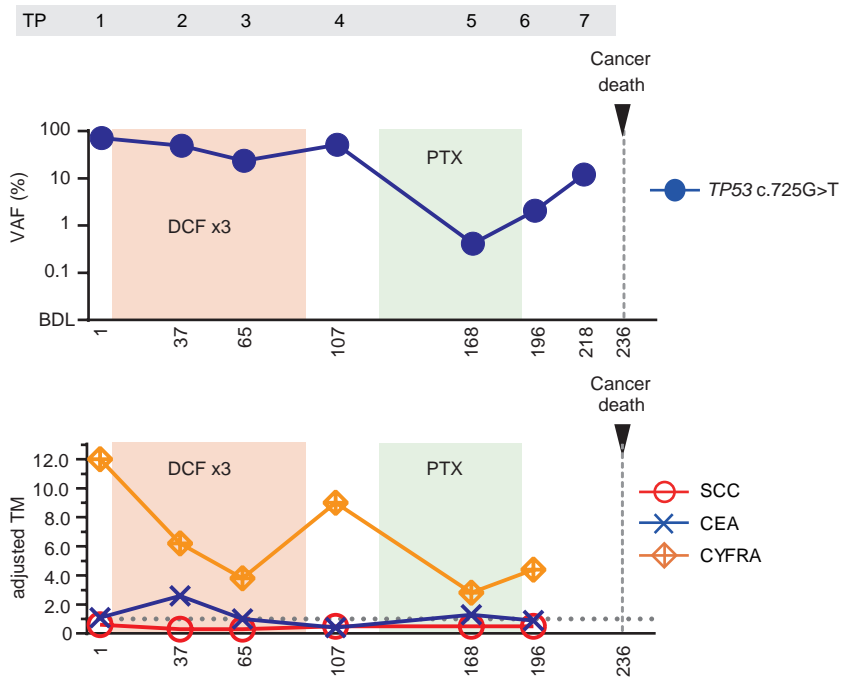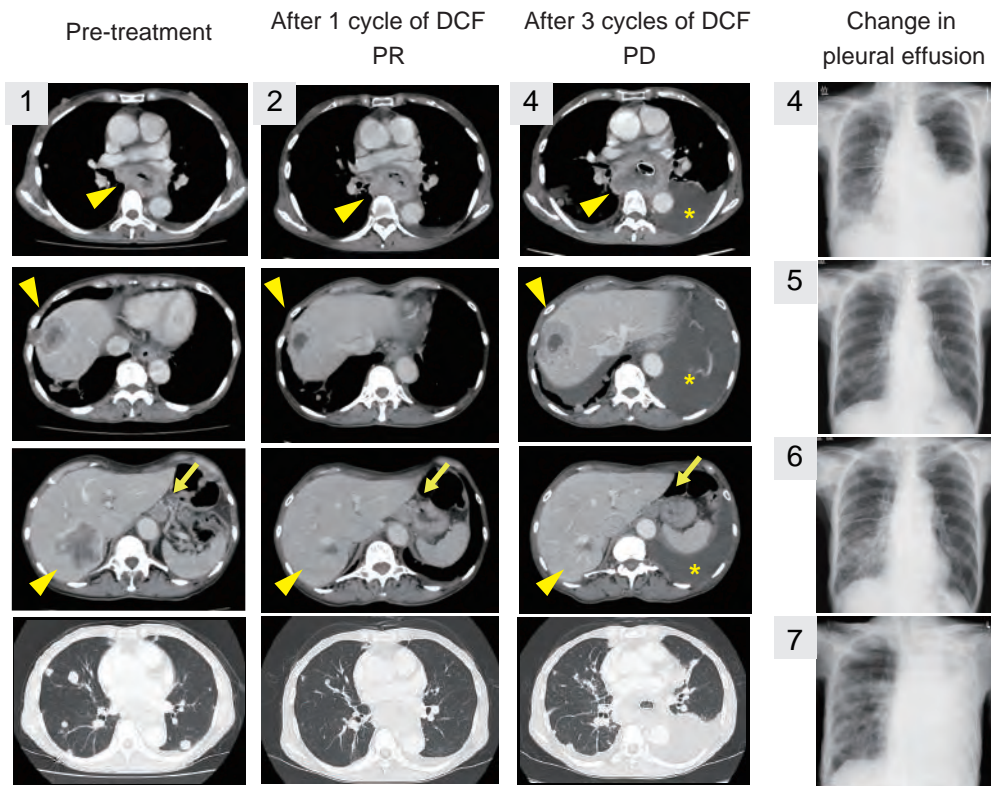

EC\_11 had a primary ESCC with adventitia invasion in the middle, upper and lower third of the esophagus, multiple mediastinal and abdominal lymph node metastases, and multiple hematogenous metastasis in the liver and bilateral lungs (TP 1). This case was diagnosed T3N3M1, Stage IV. Although metastatic lesions were reduced by administration of DCF, primary tumor growth and left pleural effusion were evident after the third cycle of DCF (TP 4). Weekly paclitaxel therapy temporarily reduced the pleural effusion (TP 4-7), but the patient died of cancer progression on Day 236. Arrowheads in CT images indicate primary tumor and liver metastasis, whereas arrows indicate lymph node metastasis. Yellow asterisks indicate pleural effusion and ascites.

EC\_12 Stage IA

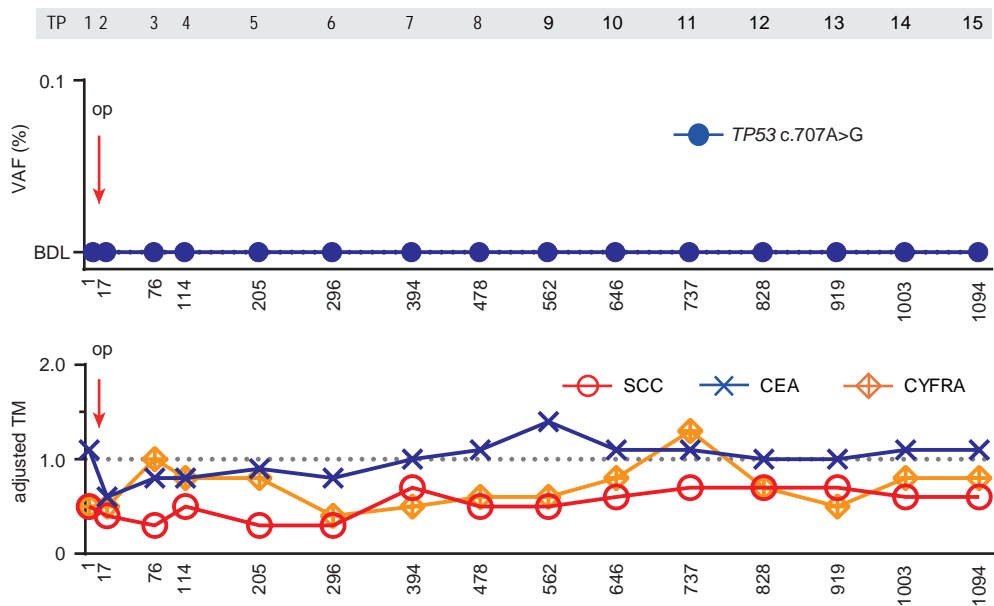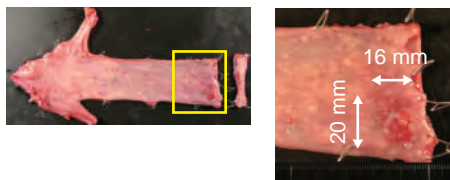

Resected specimen  
pT1bN0M0, stage IA

EC\_12 had superficial ESCC in the middle third of the esophagus that was surgically resected. The tumor was 16 x 20 mm<sup>2</sup> and microscopically confirmed tumor invasion was limited to the submucosal layer. No lymph node metastasis was observed.

## EC\_13 Stage IV

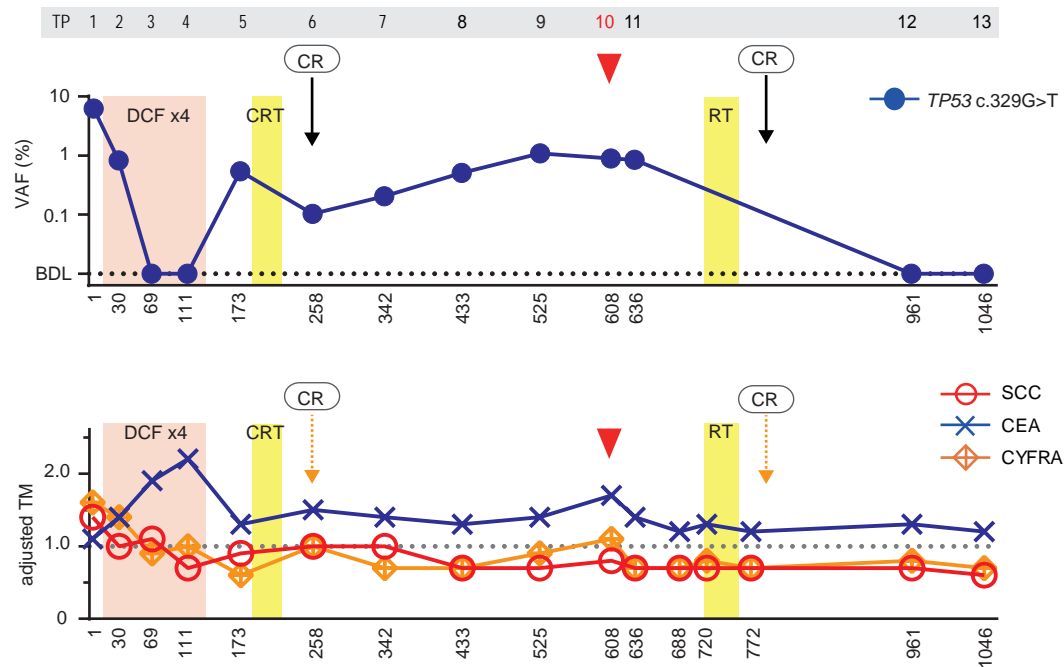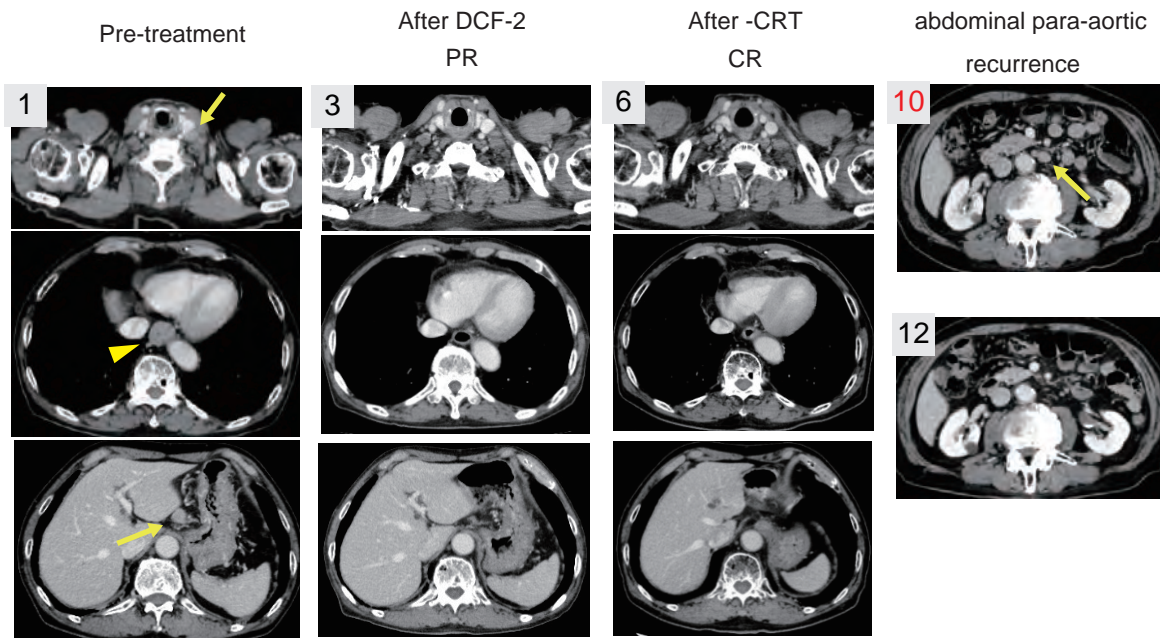

EC\_13 had a primary ESCC with adventitia invasion in the lower third of the esophagus with multiple lymph nodes metastasis in mediastinal, abdominal, and cervical regions (TP 1). As the cervical metastatic node was extra-regional metastasis, this case was diagnosed T3N1M1, Stage IV. Four cycles of DCF followed by CRT achieved CR (TP 6). An abdominal para-aortic lymph node metastasis was observed by CT on Day 608 (TP 10). Red arrowheads in the upper panels indicate the time point when recurrence was clinically evident. A yellow arrowhead and arrows in CT images indicate primary tumor and lymph node metastasis, respectively.

EC\_14 Stage IIIB

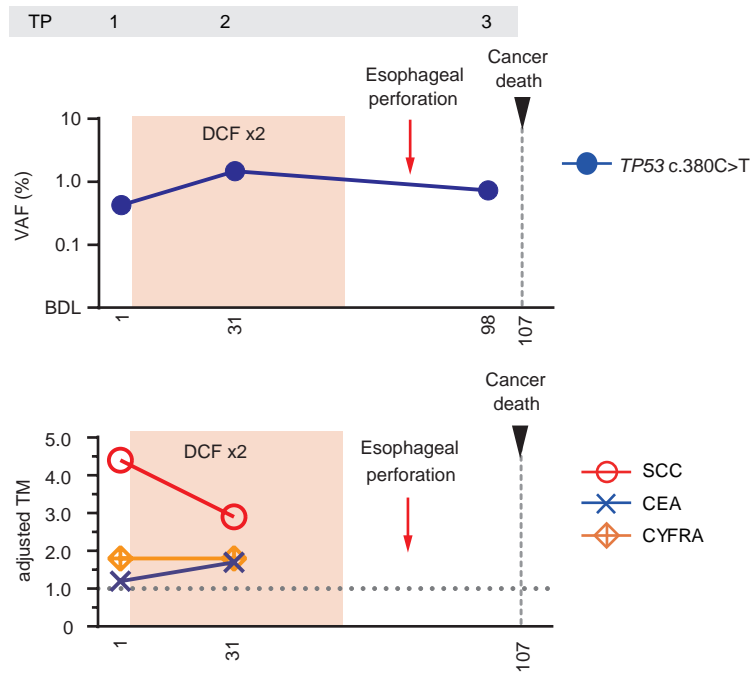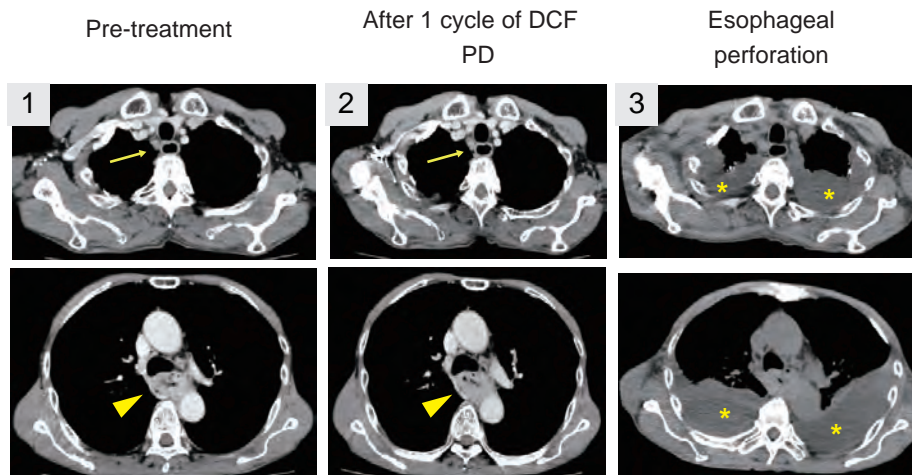

EC\_14 had ESCC that invaded the trachea in the upper and middle third of the esophagus with multiple mediastinal lymph nodes metastasis. This case was diagnosed T4bN2M0, Stage IIIC. Disease progression and esophageal perforation were observed after the first and second cycle of DCF therapy (TP 2 and 3). The patient died of cancer progression on Day 107. Yellow arrowhead and arrows in CT images indicate primary tumor and lymph node metastasis, respectively. Yellow asterisks indicate pleural effusion.



EC\_15 Stage IV

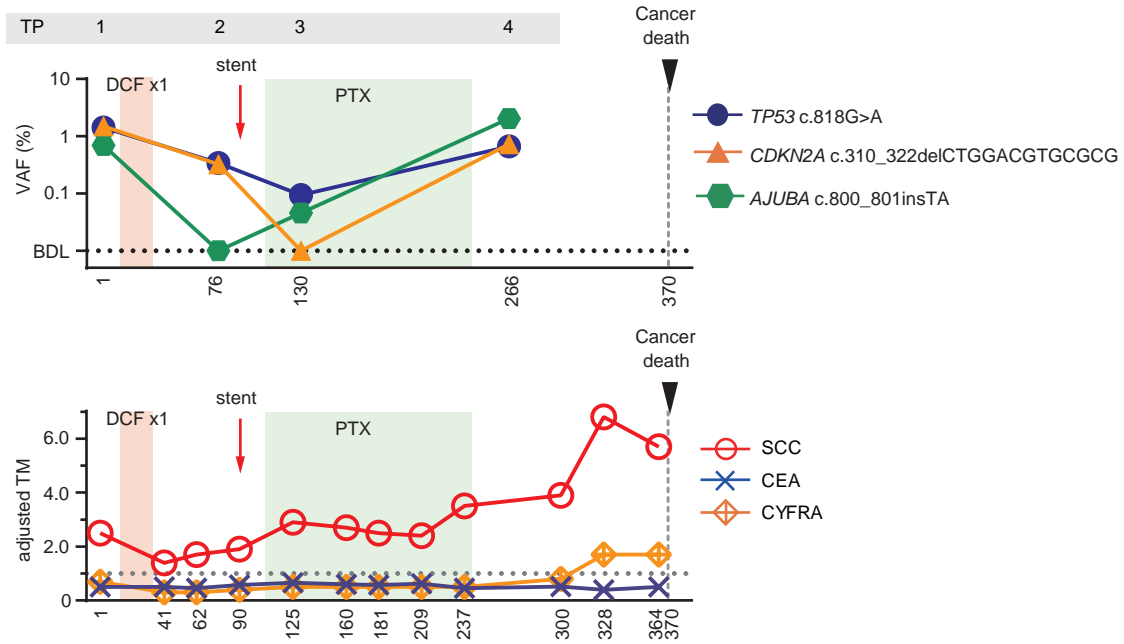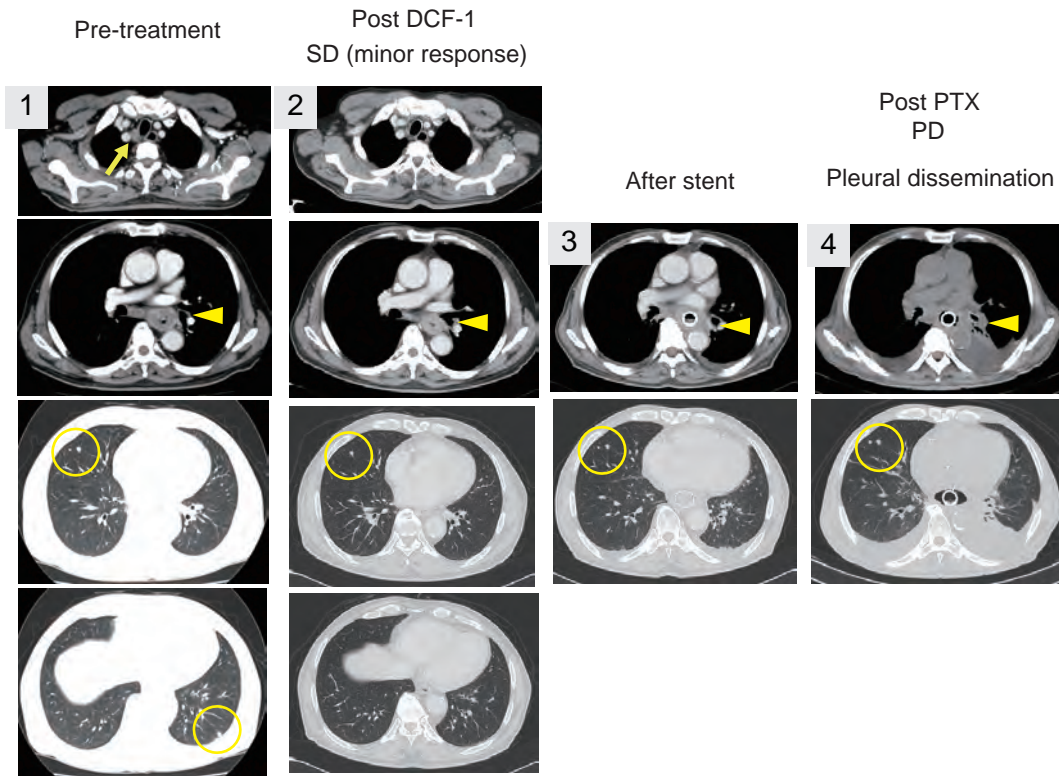

EC\_15 had an ESCC in the middle and upper third of the esophagus, invasion of the left main bronchus, multiple mediastinal lymph node metastases, and bilateral hematogenous metastases in the lung (TP 1). This case was diagnosed T4bN2M1, Stage IV. After the first cycle of DCF, shrinkage of mediastinal lymph node metastases was observed, although esophageal stenosis persisted (TP 2). An esophageal stent was placed followed by weekly paclitaxel for 6 months. With subsequent primary tumor growth and pleural dissemination, the patient died of cancer progression on Day 370. Yellow arrowheads and an arrow in CT images indicate primary tumor and lymph node metastasis, respectively. Yellow circles indicate lung metastases.

EC\_16 Stage IIIB

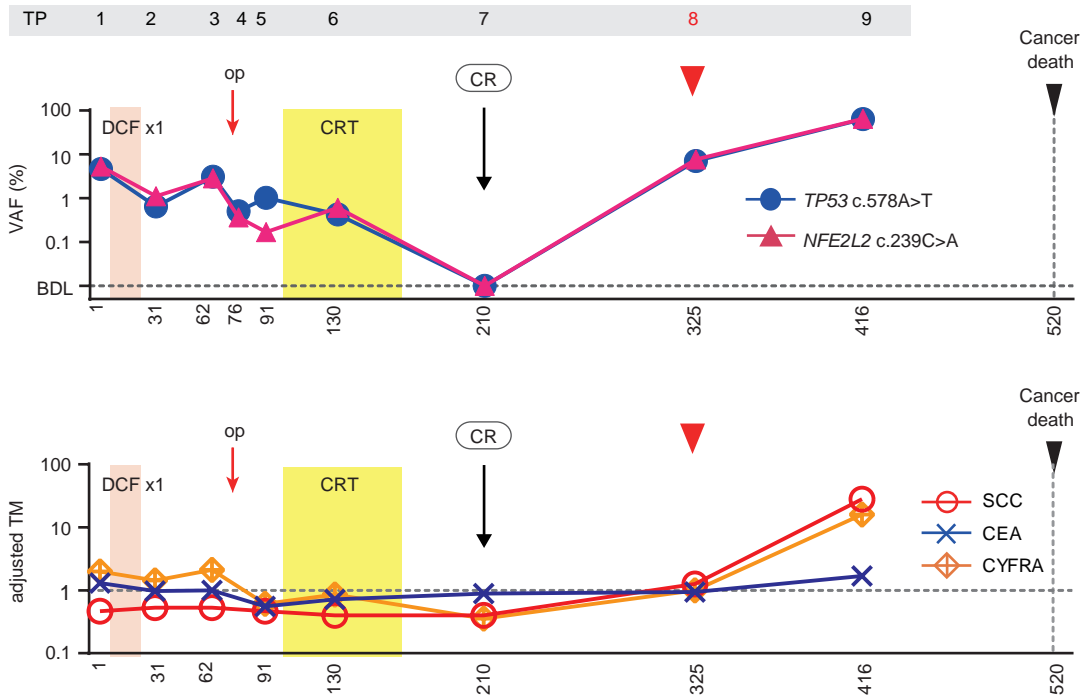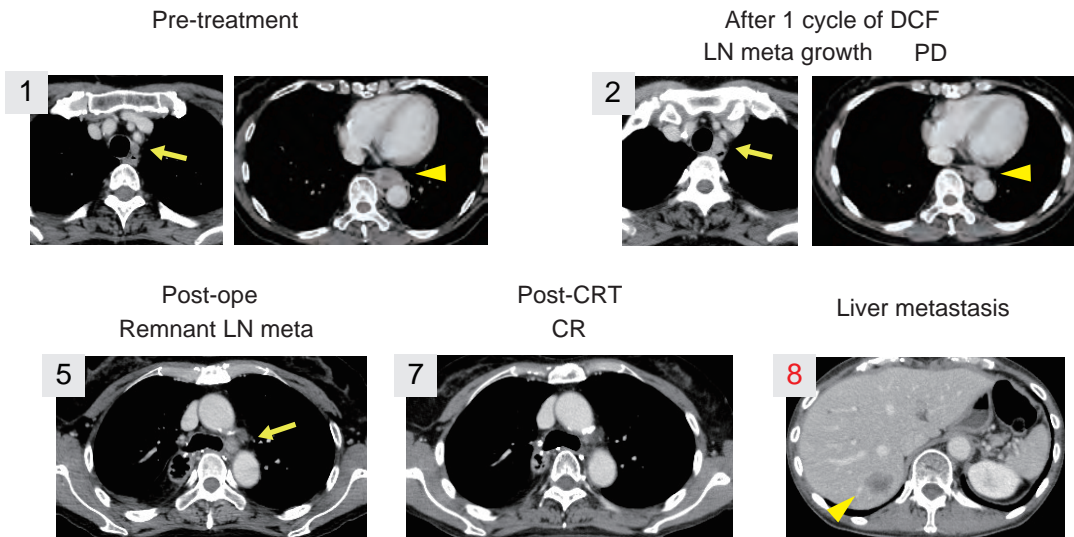

EC\_16 had a primary ESCC with adventitia invasion in the middle thoracic esophagus and left recurrent nerve lymph node metastasis (TP 1). After the first cycle of DCF, lymph node metastasis showed growth (TP 2) and subsequent surgical resection was undertaken. A remnant left tracheobronchial lymph node was noted after surgery (TP 5). CRT for mediastinal metastasis was performed and this lesion disappeared (TP 7). Liver metastasis was observed (TP 8) and the patient died of cancer on Day 520. Red arrowheads in the upper panels indicate the time point when recurrence was clinically evident. Arrowheads in CT images indicate primary tumor and liver metastasis whereas arrows indicate lymph node metastasis.

EC\_17 Stage IIIA

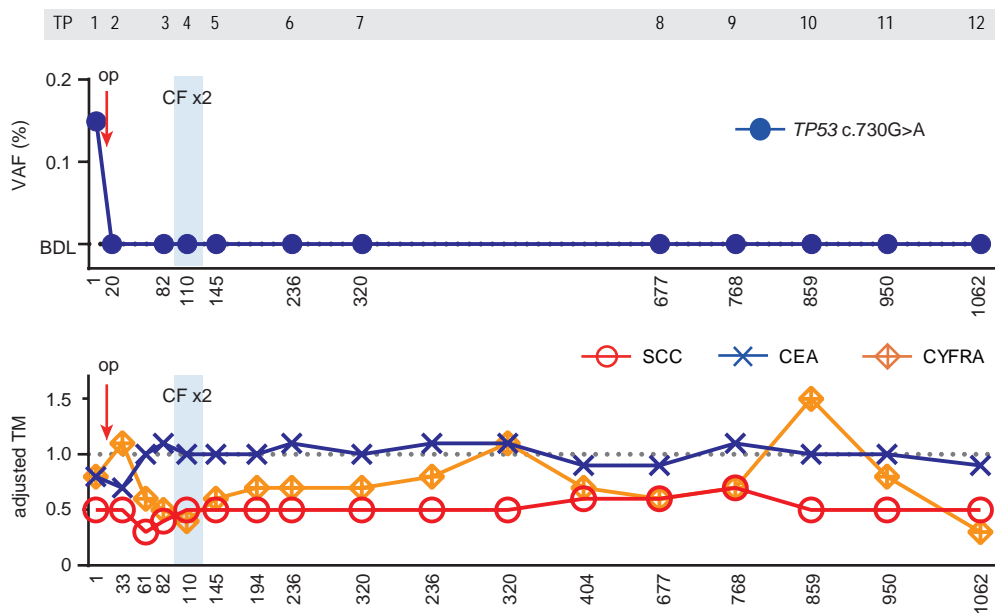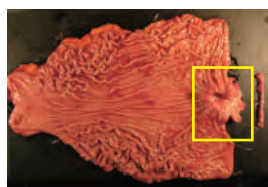

Resected specimen  
35x40 mm  
pT3N1M0, stage IIIA

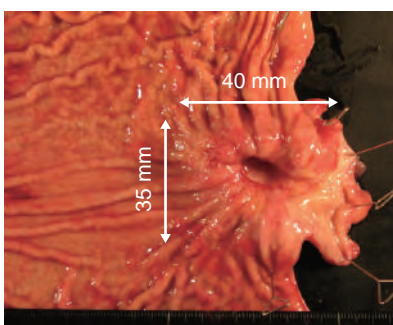

EC\_17 had a primary ESCC with adventitia invasion in the gastroesophageal junction. Surgical resection was performed as the first line therapy. Microscopically, 2 metastatic nodes were observed as paracardial lymph nodes. This case was diagnosed pathological T3N1M0, stage III. Two cycles of post-operative adjuvant CF therapy were performed. Recurrence was not observed until Day 1,062

EC\_18 Stage IV

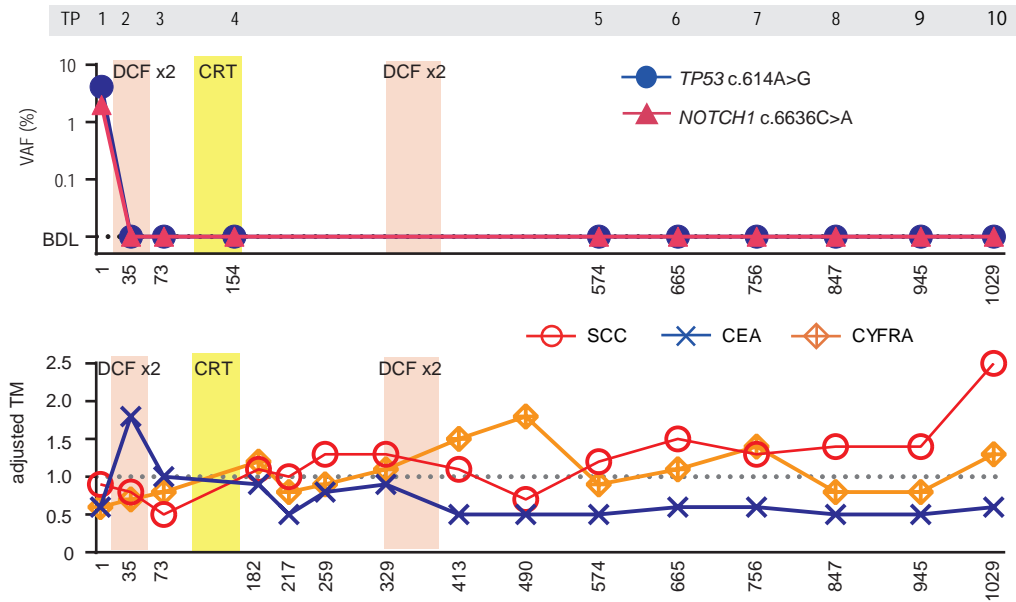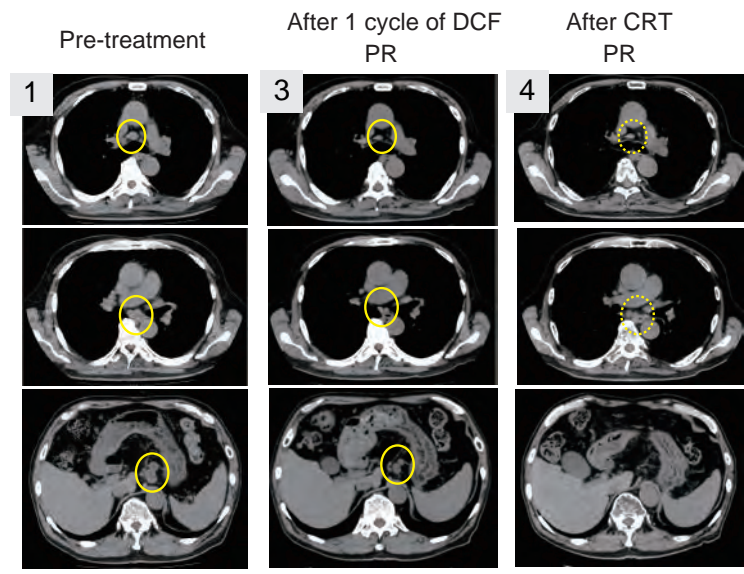

EC\_18 had a primary ESCC with submucosal invasion in the lower third of the esophagus and extensive lymph node metastasis. The middle thoracic esophagus was surrounded by multiple enlarged metastatic mediastinal lymph nodes. Extra-regional lymph node metastasis was observed in the pre-tracheal region. Furthermore, metastases were observed in lymph nodes as well as on the left gastric artery and celiac artery (TP 1). This case was diagnosed T1N2M1, Stage IV. Although some mediastinal lymph nodes were still detected after CRT, they were considered to be non-specific lymph node swelling. Recurrence of primary tumor, regrowth lymph node metastasis and emergence of new lesions were not observed through Day 1,029. Yellow circles in CT images indicate primary tumor and lymph node metastasis. Dashed yellow circles indicate mediastinal lymph nodes that were recognized as non-specific findings.

## EC\_19 Stage IIIC

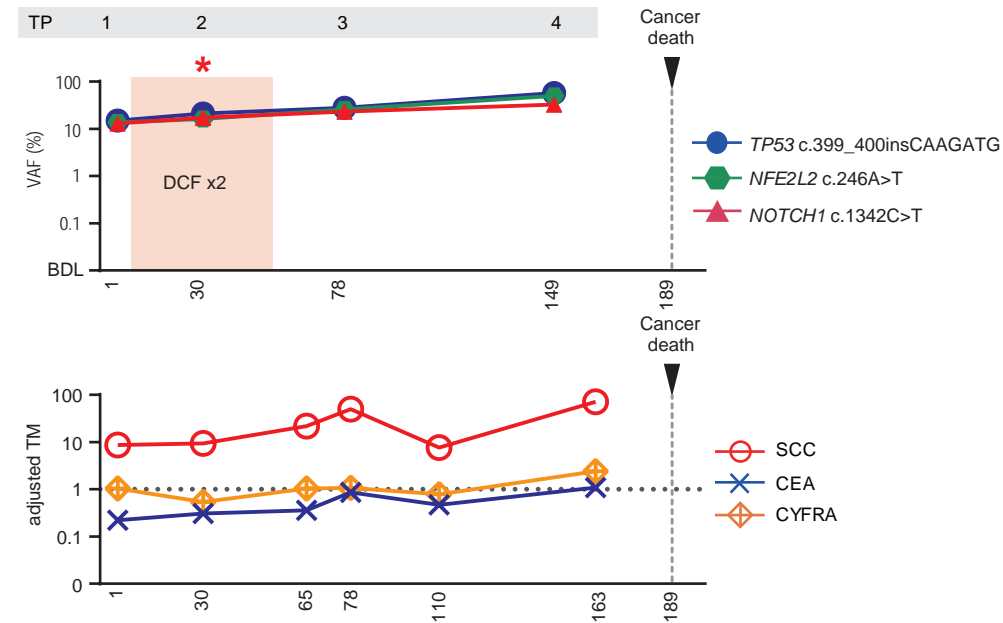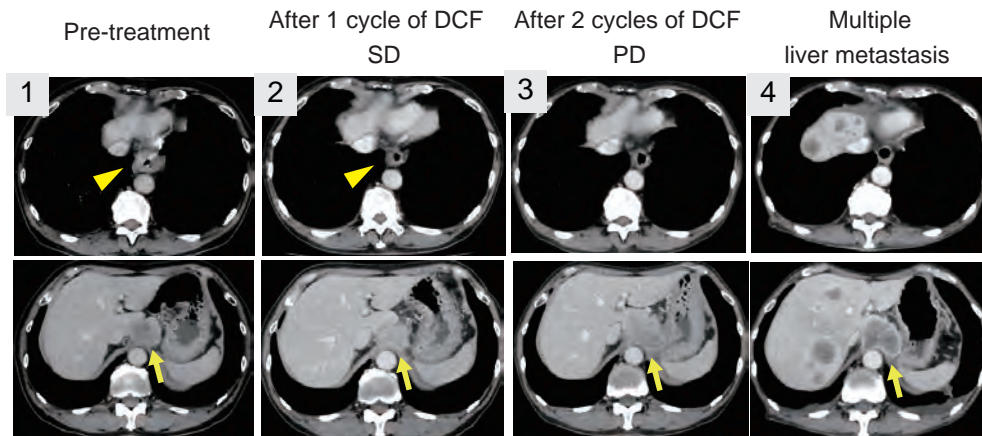

EC\_19 had a primary ESCC with adventitia invasion in the lower thoracic esophagus with a bulky abdominal lymph node metastasis (TP 1). After the first cycle of DCF, the response was SD (TP 2). After the second cycle of DCF, the enlarged lymph node metastasis confirmed PD (TP 3). Multiple liver metastases were observed on Day 149 (TP 4), and the patient died on Day 189 after treatment initiation. Asterisks indicate early elevation of ctDNA before tumor growth was confirmed by CT. Arrowheads and arrows in CT images indicate primary tumor and abdominal lymph node metastasis, respectively.

EC\_21 Stage IIA

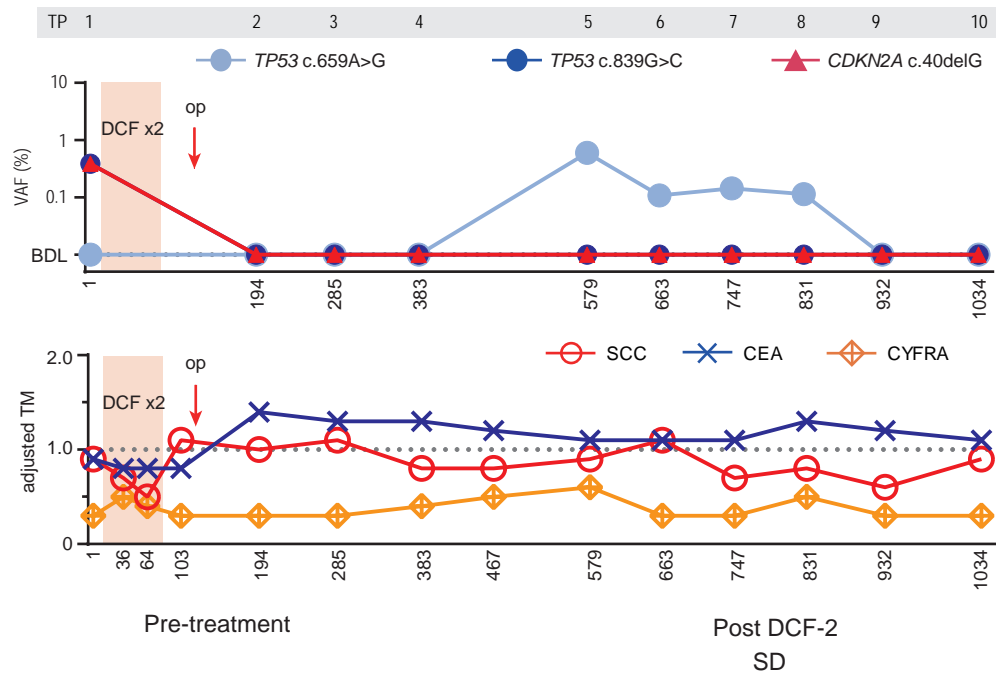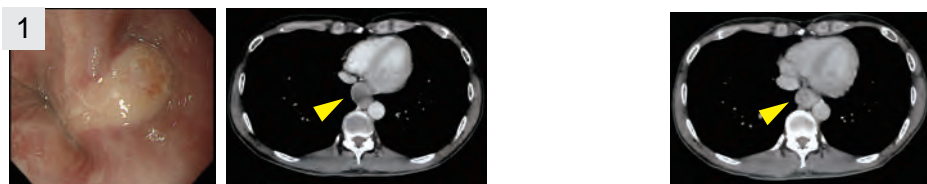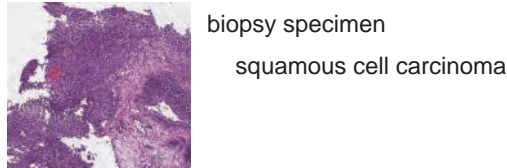

biopsy specimen  
squamous cell carcinoma

Resected specimen  
leiomyosarcoma, 33x16x25 mm

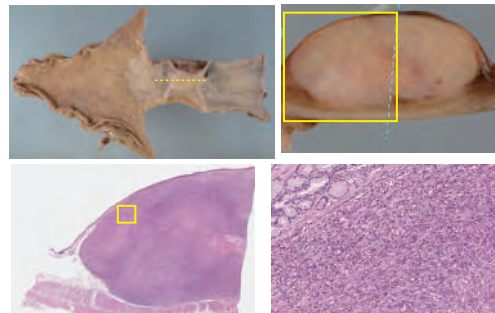

Mediastinal lymph node swelling

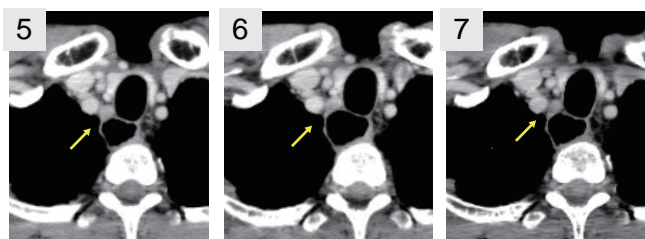

Lymph node metastasis  
was not confirmed.

EC\_21 had a primary ESCC with adventitia invasion in the lower third of the esophagus (TP 1). This case was clinically diagnosed T3N0M0, Stage IIA ESCC according to CT and biopsy findings. After the second cycle of DCF, the response was SD. Surgical resection was subsequently performed. Microscopically, the remnant esophageal tumor was classified as leiomyosarcoma comprising malignant spindle cells. According to the pathological findings in the pretreatment biopsy specimen and resected specimen, the tumor was diagnosed as carcinosarcoma. No recurrence has been observed through Day 1,034. Arrowheads in CT images indicate primary tumor, whereas arrows indicate right recurrent nerve lymph node swelling.

EC\_22 Stage IIB

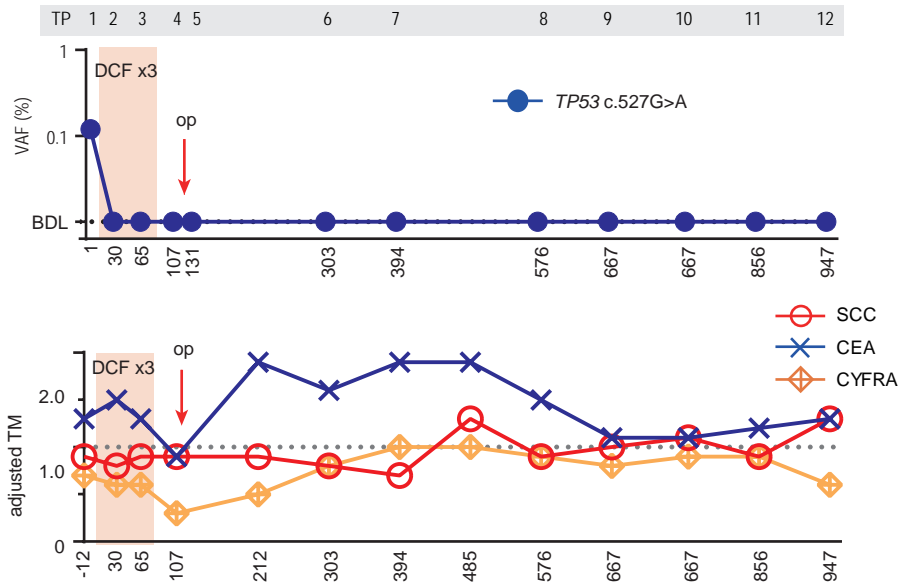

Pre-treatment

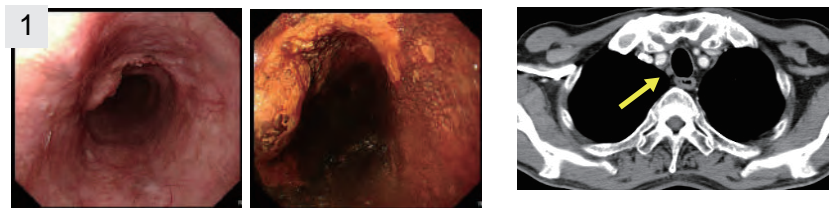

Resected specimen 2 x 2 mm<sup>2</sup>, pTisN0M0, Stage 0

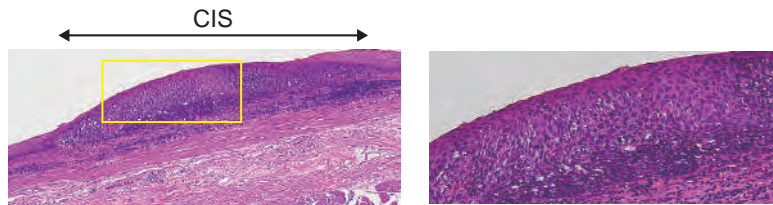

EC\_22 had a primary ESCC with muscular layer invasion in the middle third of the esophagus and right recurrent nerve lymph node metastasis (TP 1, pretreatment endoscopic (left) and CT (right) images are shown). At the end of the third cycle of DCF, surgical resection was performed. Remnant cancer cells were limited to the esophageal epithelium layer in a 2 x 2 mm<sup>2</sup> area. Recurrence was not observed until Day 947. Arrow in the CT image indicates right recurrent nerve lymph node metastasis.

EC\_23 Stage IA

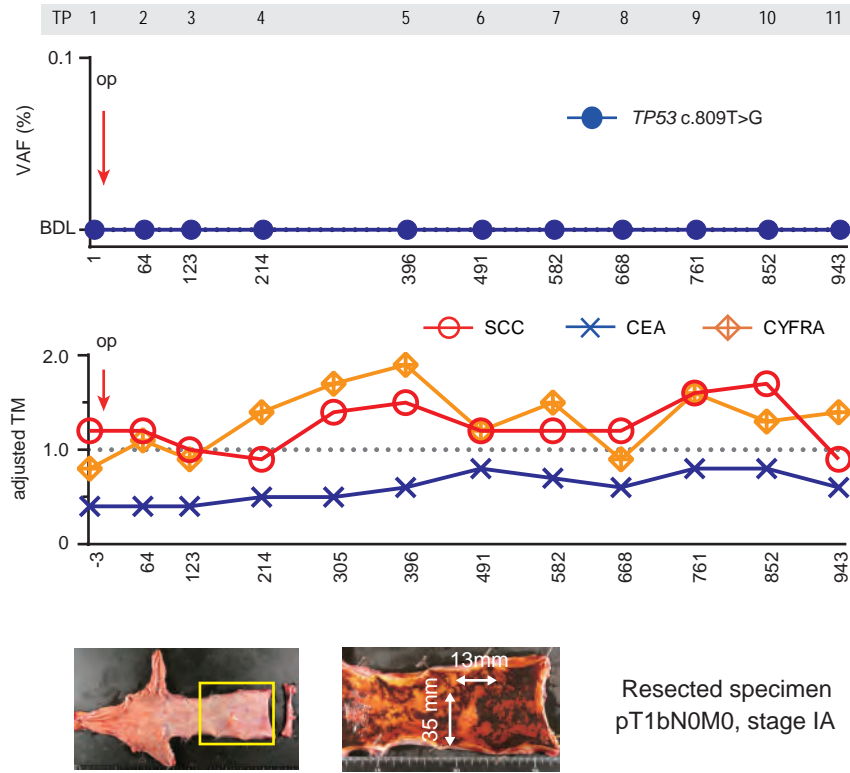

EC\_23 had superficial ESCC in the middle third of the esophagus. Although areas of the resected specimen lacking Lugol' s staining were frequently observed throughout the esophagus, the area of cancer was limited to 13 x 35 mm<sup>2</sup> (enlarged image). Microscopic pathological examinations revealed that tumor invasion was limited to the submucosal layer. Lymph node metastasis was not observed.



EC\_24 Stage IIIC

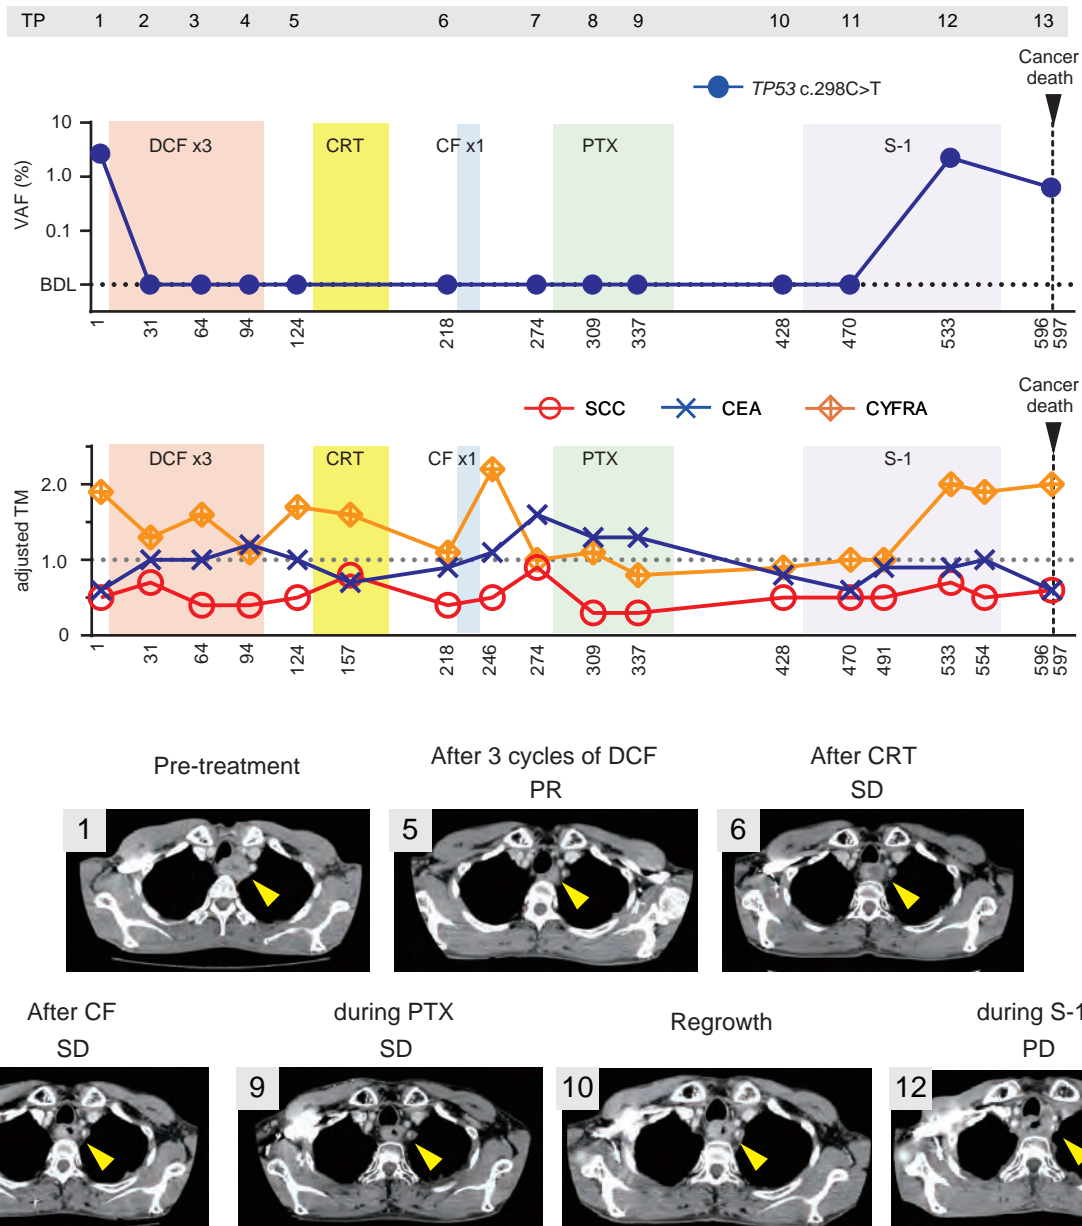

EC\_24 had a primary ESCC with trachea invasion in the cervical esophagus (TP 1). This case was diagnosed T4bN0M0, Stage IIIC. After the third cycle of DCF, tumor reduction was observed (TP 5). As cervical esophageal edema and stenosis remained after CRT, chemotherapies with CF, PTX, and S-1 continued. Although thickening of the cervical esophagus wall was persistently observed, new lesions and tumor regrowth were not evident until Day 428. The patient died of cancer progression on Day 597. Arrowheads indicate the main tumor.

EC\_25 Stage IIIA

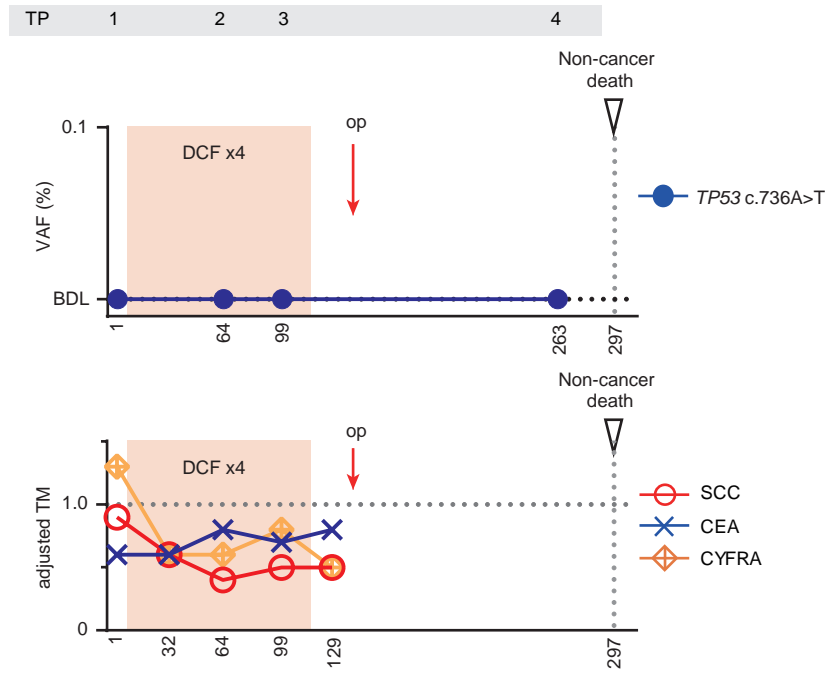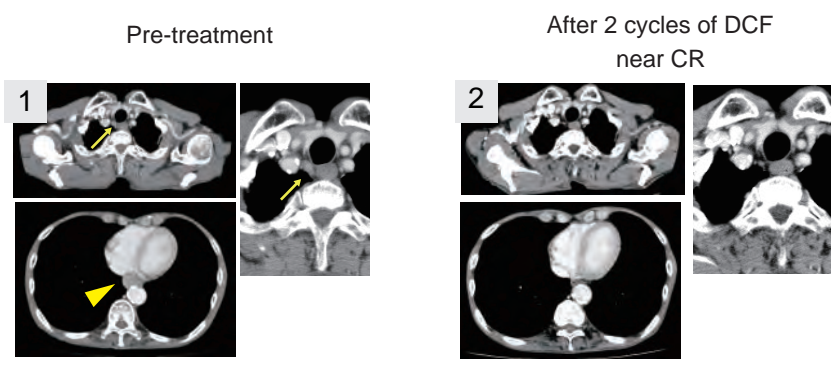

Resected specimen 1x1 mm<sup>2</sup> pTisN20M0, stage 0

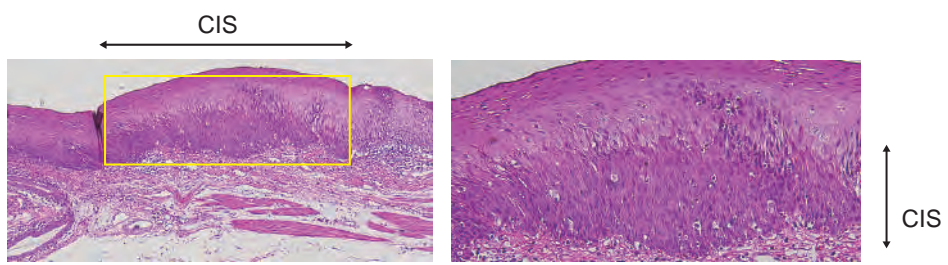

EC\_25 had a primary ESCC with adventitia invasion in the lower third of the esophagus and a right recurrent nerve lymph node metastasis (TP 1). This case was diagnosed T3N1M0, Stage IIIA. At the end of the second cycle of DCF, remarkable tumor shrinkage was observed in both the primary tumor and the metastatic node (TP 2). In the resected specimen, remnant cancer cells were limited to the epithelial layer in a 1.0 x1.0 mm<sup>2</sup> area. The area of carcinoma in situ (CIS) is shown in microscopy figures. VAF of mutations detected in the pre-treatment primary tumor were all <5 % by NGS analysis (eTable 3). Arrowhead and arrows indicate primary tumor and lymph node metastasis, respectively.

EC\_26 Stage IIIC

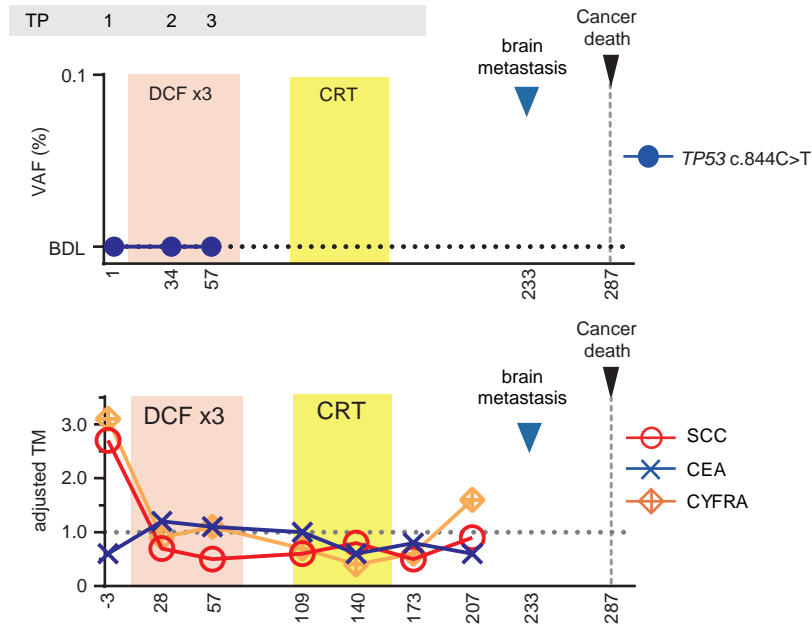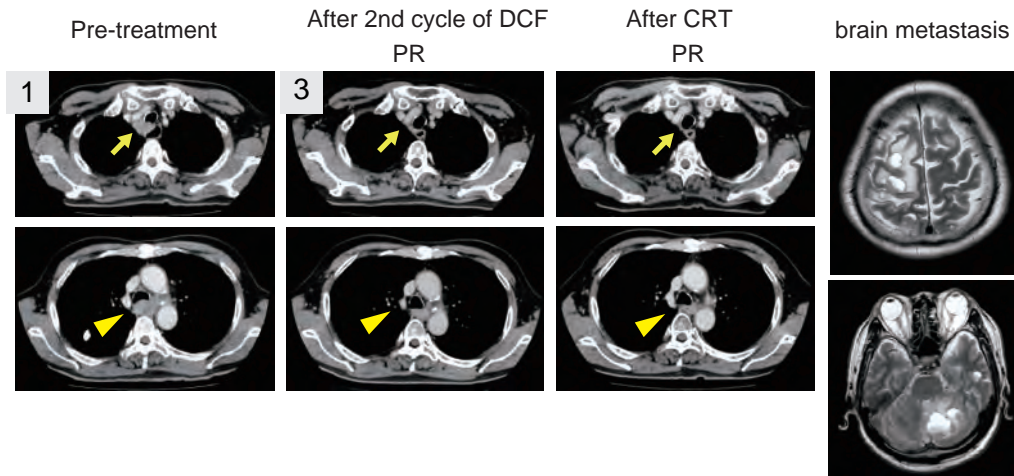

EC\_26 had a primary ESCC with trachea invasion in the middle third of the esophagus. A lymph node metastasis at the right recurrent nerve and tracheal invasion (TP 1) were found. This case was diagnosed T4bN1M0, Stage IIIC. After the third cycle of DCF, shrinkage of the primary tumor and lymph node metastasis were observed. A CRT with curative intent was subsequently initiated. Tumor shrinkage was sustained after CRT, and the patient was referred to a local hospital for subsequent chemotherapy. Multiple brain metastases were observed on Day 233 and the patient died of cancer on Day 287. Arrowheads and arrows in CT images indicate primary tumor and lymph node metastasis, respectively.

EC\_28 Stage IA

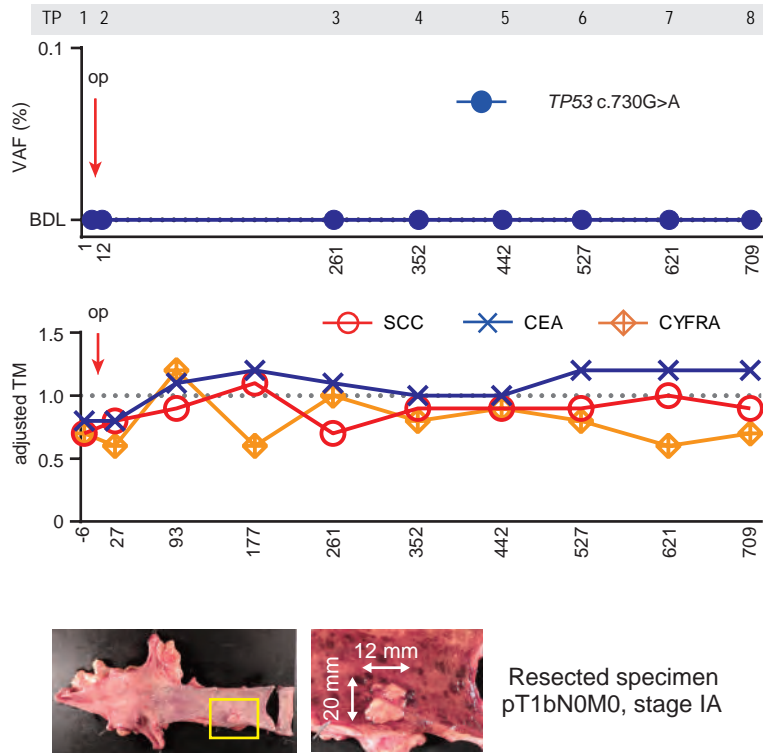

EC\_28 had superficial ESCC in the middle third of the esophagus. The tumor was 12 x 20 mm<sup>2</sup> and areas unstained with Lugol and tumor invasion were limited to the submucosal layer upon microscopic examination. Lymph node metastasis was not observed.

## EC\_29 Stage IIIC

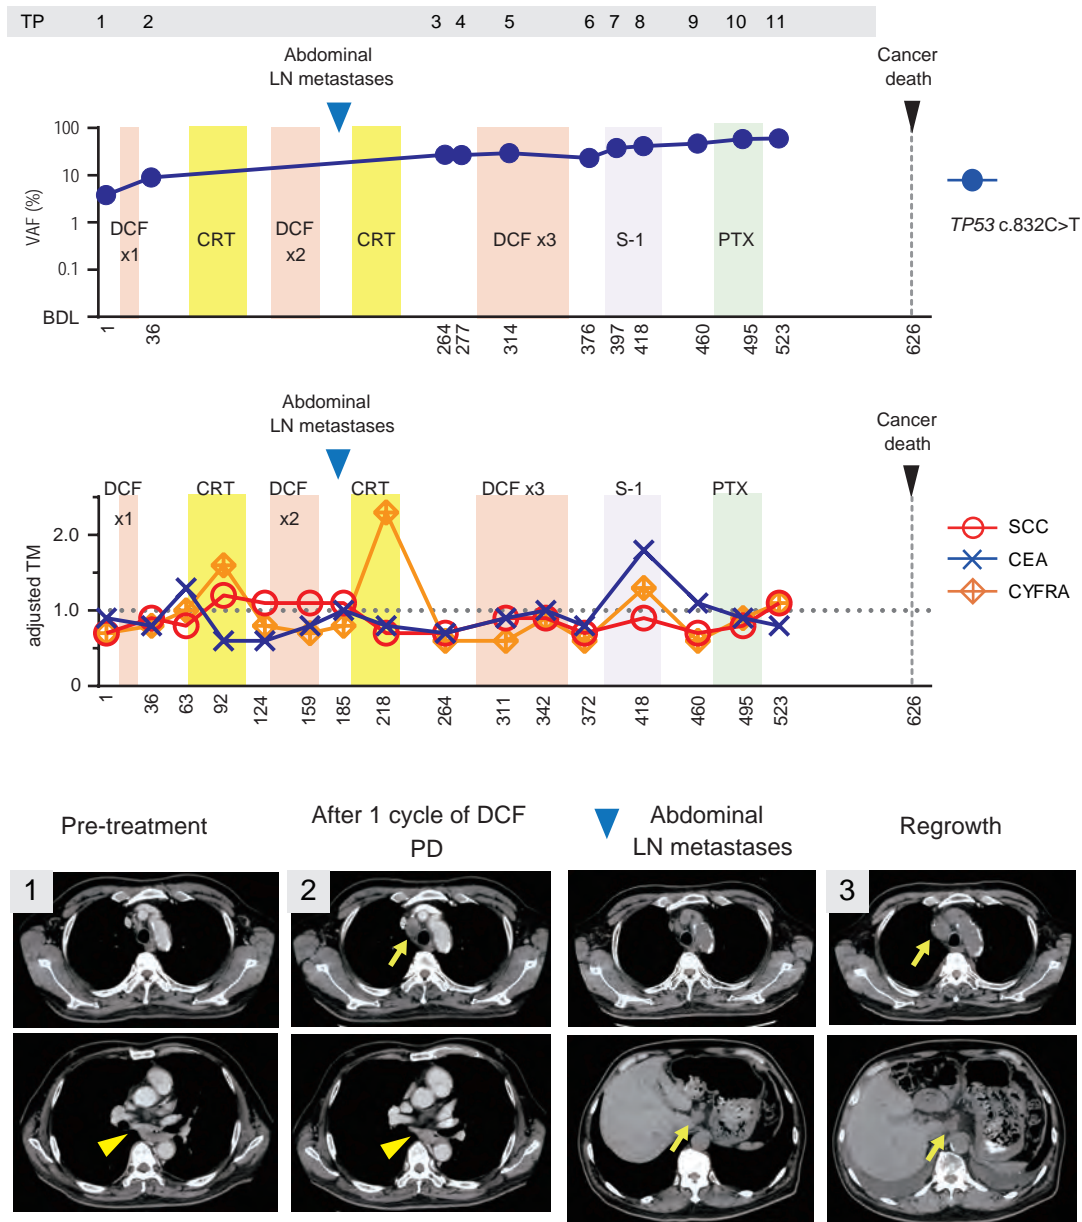

EC\_29 had a primary ESCC with left main bronchus and thoracic aorta invasion in the middle third of the esophagus, as well as the right recurrent nerve. Middle and lower para-esophageal lymph nodes metastases were also seen (TP 1). This case was diagnosed T4bN2M0, Stage IIIC. As enlargement of the right recurrent nerve lymph node metastasis was observed after the first cycle of DCF (TP 2), CRT for the primary tumor and mediastinal lymph nodes followed by 2 cycles of DCF was performed. Although primary tumor and mediastinal lymph nodes were reduced after the first CRT, paracardial and lesser curvature lymph node metastases along the branches of the left gastric artery were evident. A second cycle of CRT for the abdominal lymph nodes was performed but no reduction in tumor volume was achieved (TP 3). An additional three cycles of DCF, oral S-1 administration, and weekly paclitaxel therapy continued with no response. The patient died of cancer progression on Day 626. Arrowheads and arrows indicate primary tumor and lymph node metastasis, respectively.

EC\_30 Stage IIIB

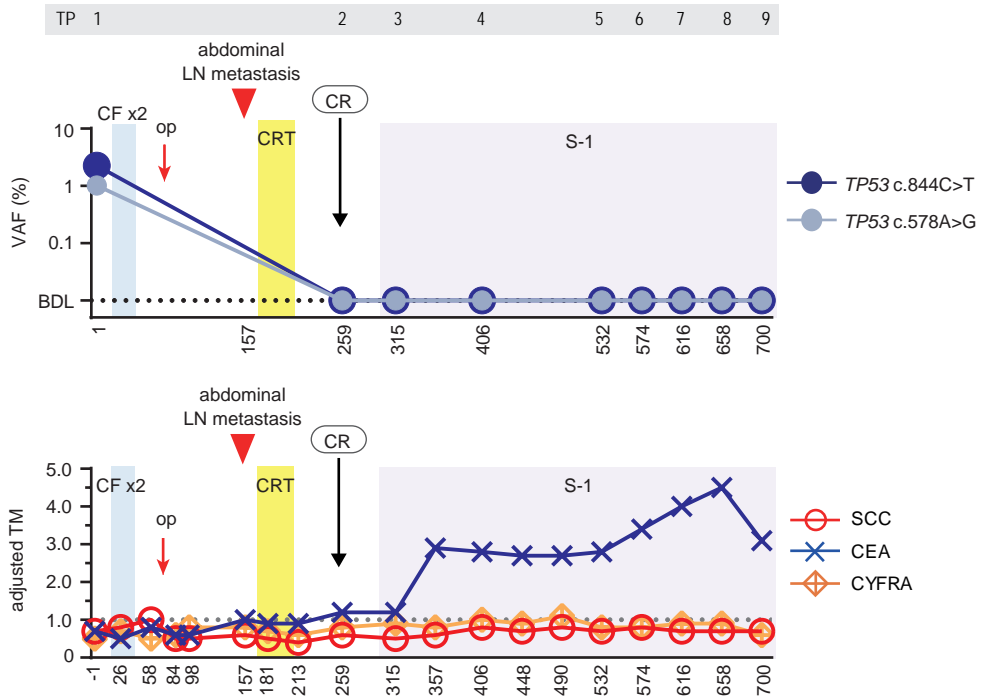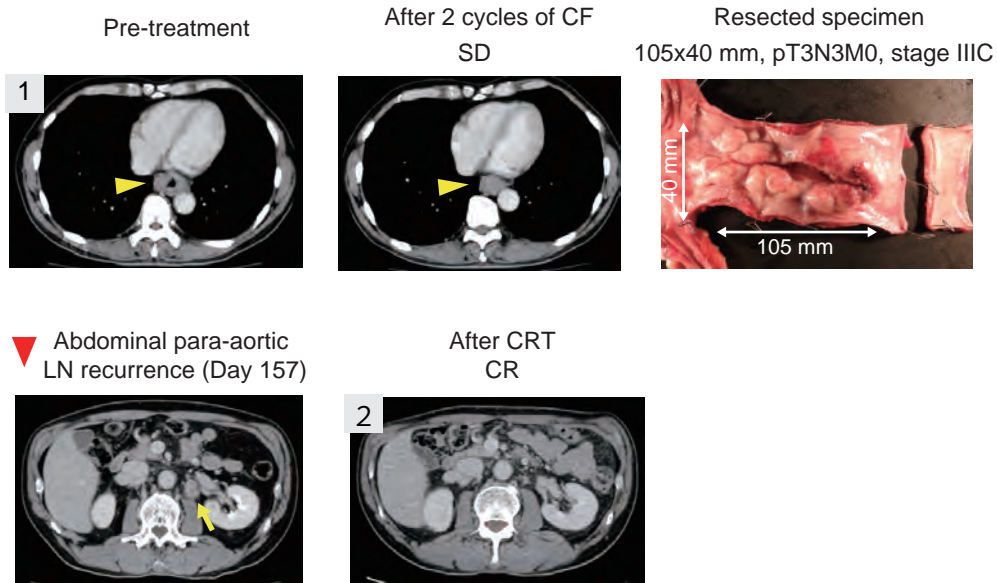

EC\_30 had a primary ESCC with adventitia invasion in the middle and lower third of the esophagus, and bulky lesser curvature lymph node metastases to the stomach as well as branches of the left gastric artery, and the right recurrent nerve. This case was diagnosed T3N2M0, Stage IIIB. Tumor shrinkage was not observed after CF and the resected specimen demonstrated a bulky tumor. Microscopically, 13 metastatic nodes were observed in abdominal lymph nodes. On Day 157, abdominal para-aortic lymph node recurrence was noted. Subsequent CRT achieved CR (TP 2), followed by S-1 adjuvant chemotherapy. No recurrence has been observed through Day 700. Arrowheads and arrow indicate primary tumor and lymph node metastasis, respectively.

EC\_31 Stage IA

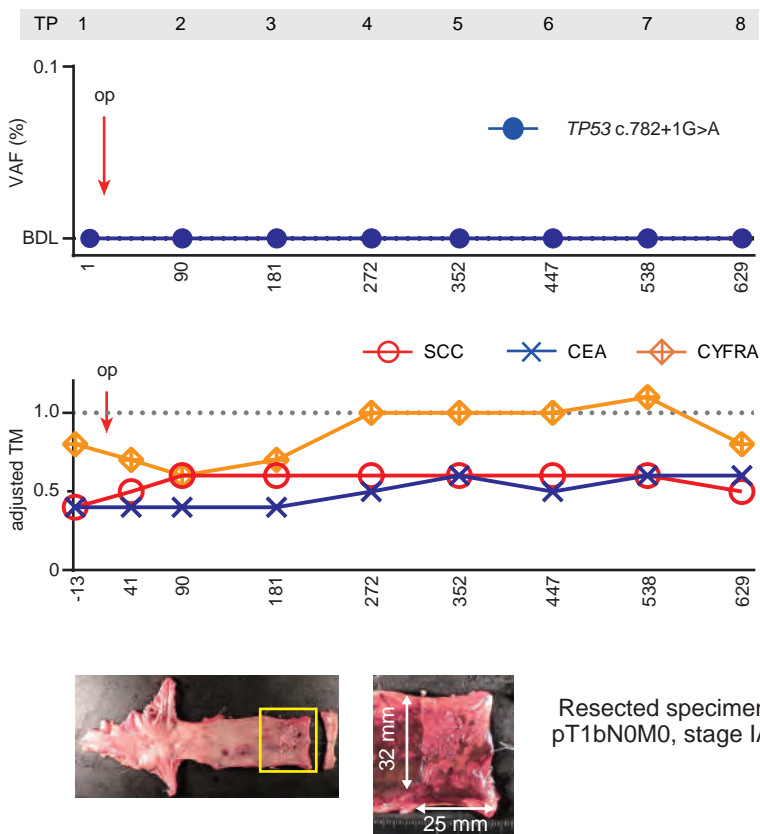

EC\_31 had superficial ESCC in the upper third of the esophagus. Macroscopic images of the resected specimen revealed that tumor had an area of 25 x 32 mm<sup>2</sup> that was unstained by Lugol. Pathological examination showed that tumor invasion was limited to the submucosal layer.

EC\_32 Stage IIIC

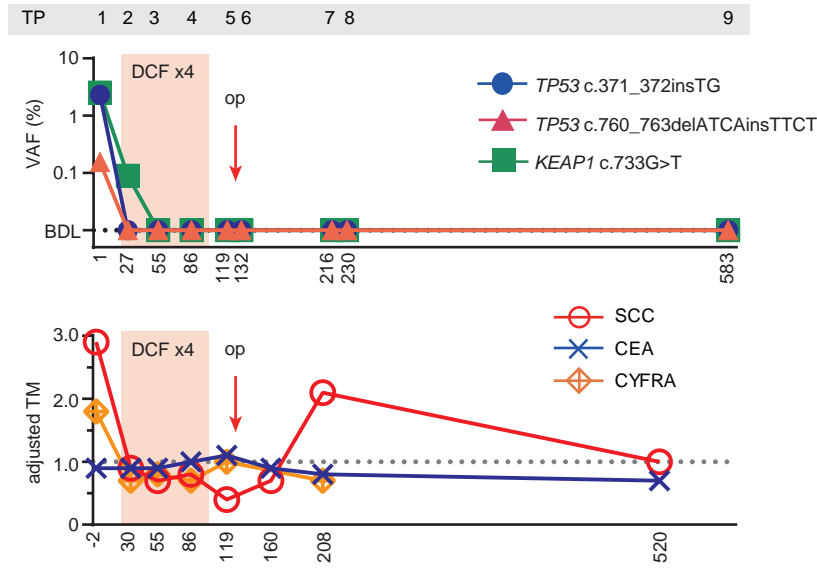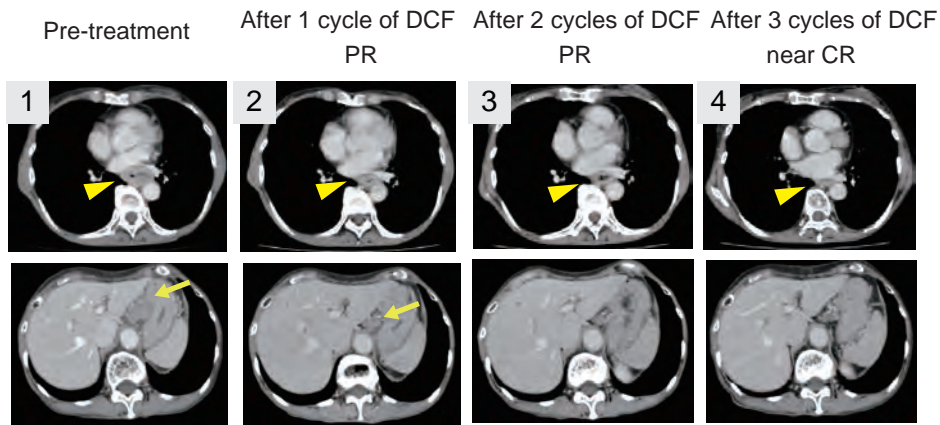

Resected specimen 15 x 4 mm<sup>2</sup>, pT1aN1M0, stage IB

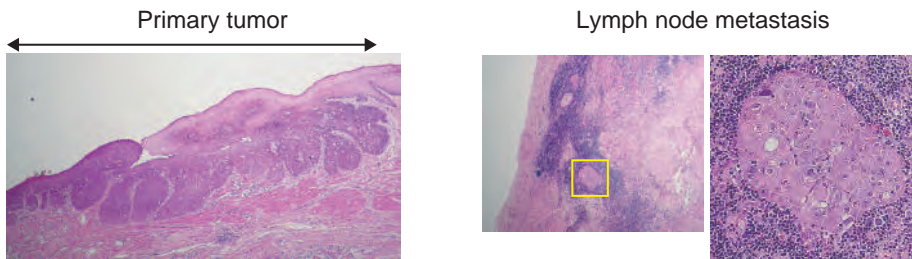

EC\_32 had a primary ESCC with adjacent pleural and pericardium invasion in the middle third of the esophagus and bulky lesser curvature lymph node metastases to the stomach as well as branches of the left gastric artery (TP 1). This case was diagnosed T4aN1M0, Stage IIIC. After the fourth cycle of DCF, remarkable tumor shrinkage was observed and surgical resection was performed. In the resected specimen, remnant cancer cells were limited to the muscularis mucosa in a 15 x 4 mm<sup>2</sup> area in the esophagus and a small area in the lesser curvature lymph node metastasis that had extensive fibrosis. Recurrence has not been observed through Day 520. Arrowheads and arrows in CT images indicate primary tumor and lymph node metastasis, respectively.



EC\_33 Stage IIIC

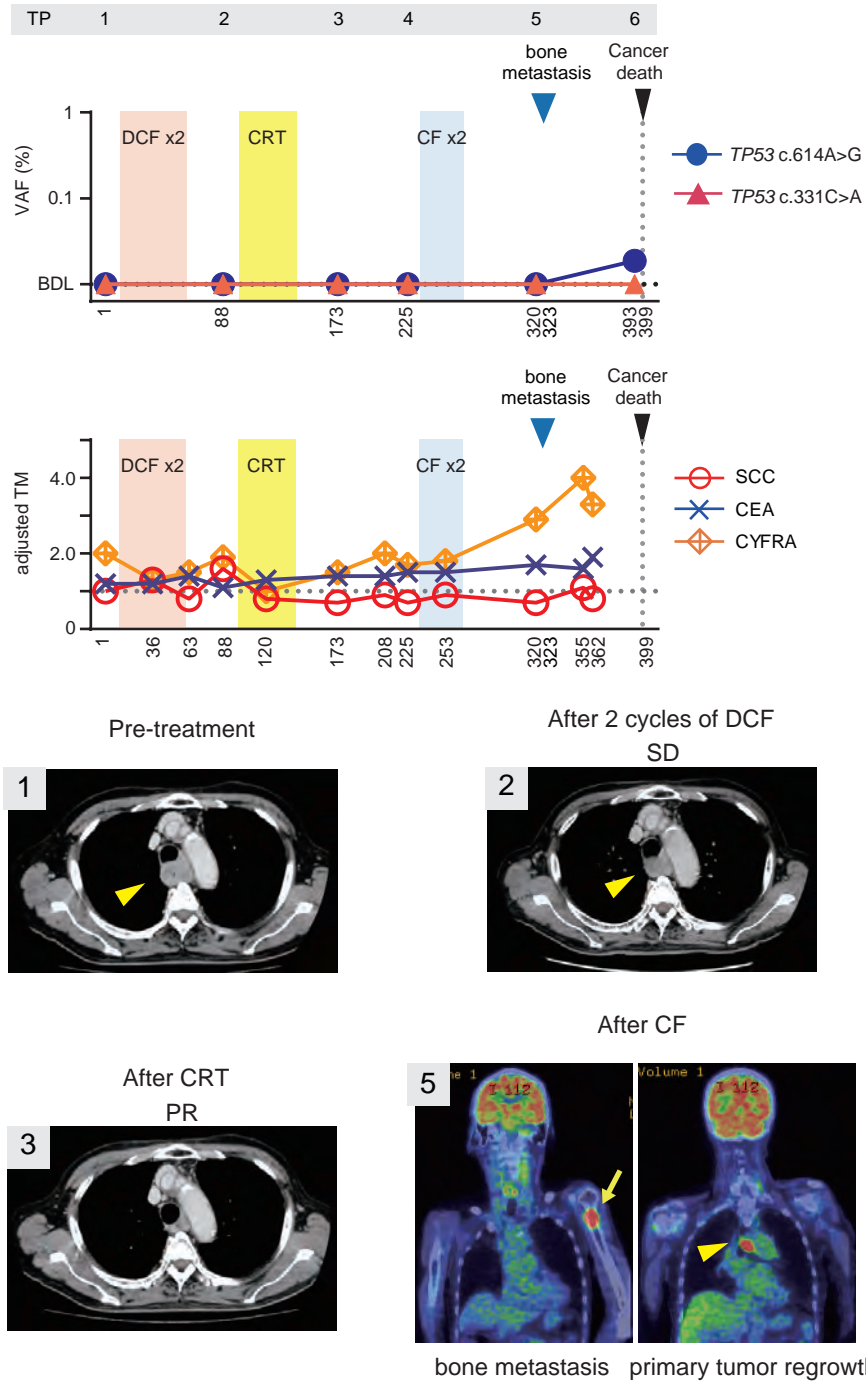

EC\_33 had a primary ESCC with trachea invasion in the upper third of the esophagus and a right recurrent nerve lymph node metastasis. This case was diagnosed T4bN1M0, Stage IIIC. Tumor shrinkage was not observed after two cycles of DCF, but the tumor was reduced after CRT and the patient had a PR (TP 2 and 3). After two cycles of CF, by Day 323 bone metastasis in the left humerus and primary tumor regrowth were observed by FDG-PET/CT. The patient died of cancer on Day 399. Arrowheads and arrow indicate primary tumor and bone metastasis, respectively.

EC\_34 Stage IA

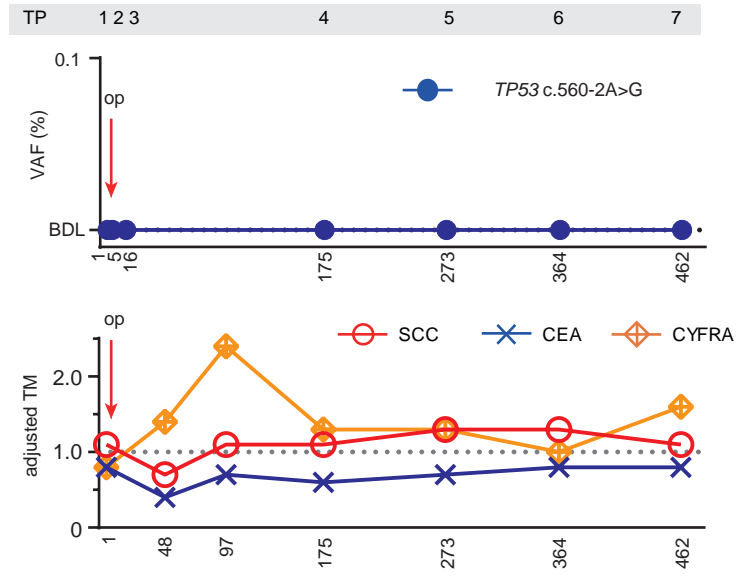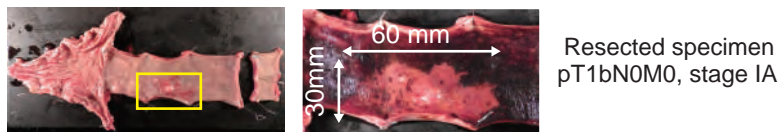

EC\_34 had a superficial ESCC in the lower third of the esophagus. The resected tumor had a 60 x 30 mm<sup>2</sup> area that was unstained by Lugol. Pathological examination revealed that tumor invasion was limited to the submucosal layer.

EC\_35 Stage IIIC

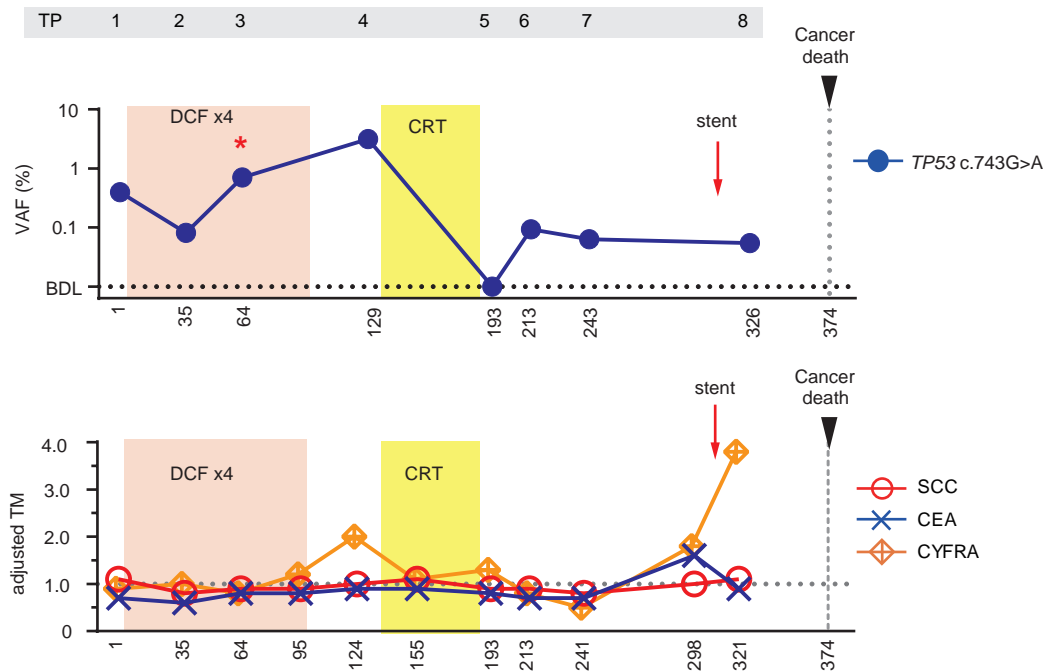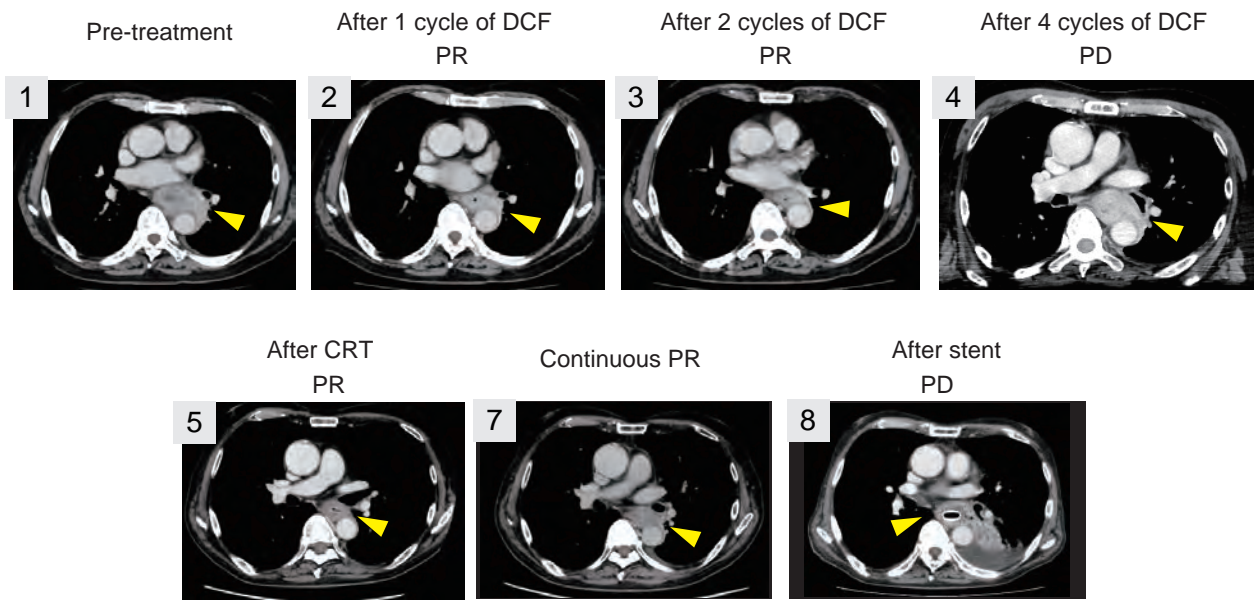

EC\_35 had a bulky primary ESCC that invaded the thoracic aorta in the middle third of the esophagus (TP 1). After the first cycle of DCF, tumor shrinkage was observed, but by the end of the fourth cycle of DCF, tumor regrowth was observed (TP 4). A CRT showed remarkable, temporary shrinkage of the primary tumor (TP 5), but esophageal stenosis progressed (TP 6-8). An esophageal stent was inserted. The patient died of cancer on Day 374. Asterisks indicate early elevation of ctDNA before tumor regrowth was confirmed by CT. Arrowheads indicate primary tumor.

## EC\_36 Stage IB

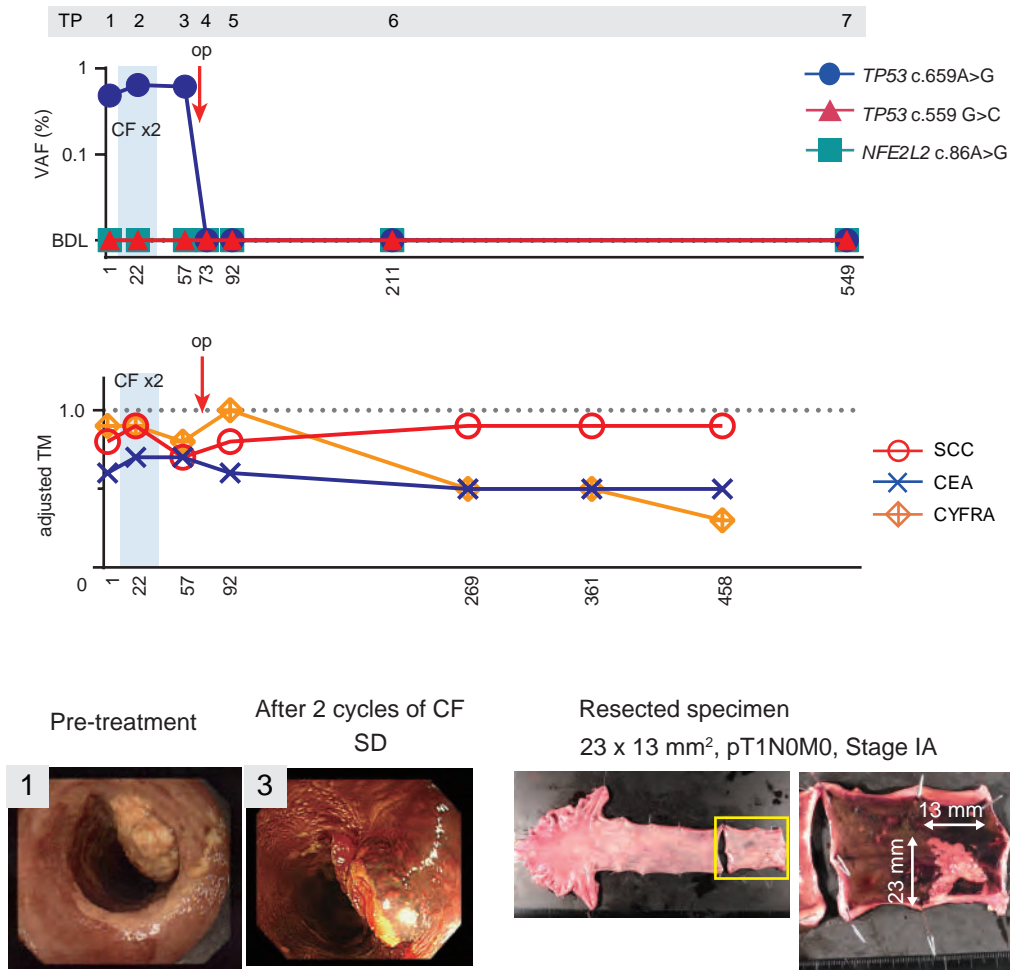

EC\_36 had a primary ESCC with muscular invasion in the upper third of the esophagus. This case was diagnosed T2N0M0, Stage IB. Endoscopic images of the primary tumor at pre-treatment (TP 1) and after CF (TP 3) are shown. In the resected specimen, the tumor had a 13 x 23 mm<sup>2</sup> area that was not stained by Lugol. Pathological examination indicated that remnant cancer cells were limited to the submucosal layer. No recurrence was observed after surgery through Day 549.
